# Supplementary material for: Anion-exchange facilitated selective extraction of sulfate and phosphate by overcoming the Hofmeister bias
Source: Royal Society of Chemistry journal article supplement (doi:10.1039/d3ra01771k), 2023-01-01
Supplement: d3ra01771k1.pdf [file d3ra01771k1.pdf]

## Anion-exchange facilitated selective extraction of sulfate and phosphate by overcoming Hofmeister bias

Anamika Gogoi,<sup>a</sup> Dipjyoti Dutta,<sup>a</sup> Beatriz Gil-Hernández,<sup>c</sup> Sandeep Kumar Dey,<sup>\*a,b</sup>

<sup>a</sup>Material Science and Technology Division, CSIR-North East Institute of Science and Technology, Jorhat, Assam 785006, India. Email: [sandeep@neist.res.in](mailto:sandeep@neist.res.in) Phone: +91-7387633550

<sup>b</sup>Academy of Scientific and Innovative Research (AcSIR), Ghaziabad, Uttar Pradesh, India.

<sup>c</sup>Departamento de Química, Facultad de Ciencias, Sección Química, Universidad de La Laguna, 38206, La Laguna, Tenerife, Spain. Email: [beagher@ull.es](mailto:beagher@ull.es).

---

### Contents

| Sl. No. | Headings                                                                                                        | Page Numbers |
|---------|-----------------------------------------------------------------------------------------------------------------|--------------|
| 1       | Materials and experimental methods                                                                              | 1            |
| 2       | Synthesis and characterization of tris-urea receptors ( <b>L</b> <sub>1</sub> – <b>L</b> <sub>3</sub> )         | 2-3          |
| 3       | Synthesis and characterization of tris-thiourea receptors ( <b>L</b> <sub>4</sub> )                             | 4            |
| 4       | Synthesis of oxoanion complexes of tris-urea receptors ( <b>L</b> <sub>1</sub> – <b>L</b> <sub>3</sub> )        | 5            |
| 5       | Synthesis of oxoanion complexes of tris-thiourea receptors ( <b>L</b> <sub>4</sub> )                            | 5            |
| 6       | Anion complexes of <b>L</b> <sub>1</sub> : Characterization by NMR spectroscopy                                 | 6-10         |
| 7       | Anion complexes of <b>L</b> <sub>2</sub> : Characterization by NMR spectroscopy                                 | 11-16        |
| 8       | Anion complexes of <b>L</b> <sub>3</sub> : Characterization by NMR spectroscopy                                 | 17-20        |
| 9       | Selective extraction of sulfate by <b>L</b> <sub>1</sub> : <sup>1</sup> H-NMR spectra                           | 21-26        |
| 10      | Selective extraction of sulfate by <b>L</b> <sub>2</sub> : <sup>1</sup> H-NMR spectra                           | 27-32        |
| 11      | Selective extraction of sulfate by <b>L</b> <sub>3</sub> : <sup>1</sup> H-NMR spectra                           | 33-38        |
| 12      | Anion complexes of <b>L</b> <sub>4</sub> : Characterization by NMR spectroscopy                                 | 39-42        |
| 13      | Selective extraction of phosphate by <b>L</b> <sub>4</sub> : <sup>1</sup> H-NMR and <sup>31</sup> P-NMR spectra | 43-49        |
| 14      | Sulfate extraction under environmentally relevant conditions                                                    | 50           |
| 15      | Control experiments: <sup>1</sup> H-NMR and <sup>31</sup> P-NMR spectra                                         | 51-56        |
| 16      | X-ray diffraction analysis                                                                                      | 57-58        |

### 1. Materials and experimental methods

All reagents and solvents were obtained from commercial sources and used as received without any further purification. Tris(2-aminoethyl) amine (Tren), 3-nitrophenyl isocyanate, 4-nitrophenyl isocyanate, 4-fluorophenyl isocyanate, 4-nitrophenyl isothiocyanate and all quaternary ammonium (tetraalkylammonium) salts were purchased from Sigma-Aldrich or TCI Chemicals. Solvents (analytical grade) for synthesis and extraction experiments were purchased from Merck (India), and used without further purification. <sup>1</sup>H, <sup>31</sup>P and <sup>19</sup>F NMR spectra were recorded in DMSO-D<sub>6</sub> (99.9% D) on a Bruker FT-500 MHz spectrometer at 298 K and chemical shifts were recorded in parts per million (ppm) on the scale using residual solvent peak as a reference, and <sup>13</sup>C-NMR spectra were obtained at 125 MHz instrument. Powder X-ray diffraction analysis was carried out on a Rigaku Ultima-IV diffractometer (Cu-K<sub>α</sub> λ = 1.5418 Å).

## 2. Synthesis and characterization of tris-urea receptors ( $L_1$ , $L_2$ and $L_3$ )

Receptors  $L_1$ - $L_3$  were synthesized by the reaction of tris(2-aminoethyl)amine with 3-nitrophenylisocyanate/4-nitrophenylisocyanate/4-fluorophenylisocyanate in a 1:3.1 molar ratio at room temperature (Scheme S1).<sup>1</sup> In a 50 mL flat bottom flask, 146  $\mu$ L of tris(2-aminoethyl)amine (1 mmol) was dissolved in 10 mL of tetrahydrofuran (THF) and 510 mg of 3-nitrophenylisocyanate/4-nitrophenylisocyanate (3.1 mmol) was added into the above solution mixture and was allowed to stir at room temperature (25–30  $^{\circ}$ C) for about 12 hours. The precipitate formed in the reaction mixture was then filtered and washed with methanol a couple of times (2 x 10 mL) and dried at room temperature. Yield:  $L_1$  83%,  $L_2$  85%, and  $L_3$  80% (percentage yields reported are the average value of three reactions in each case).

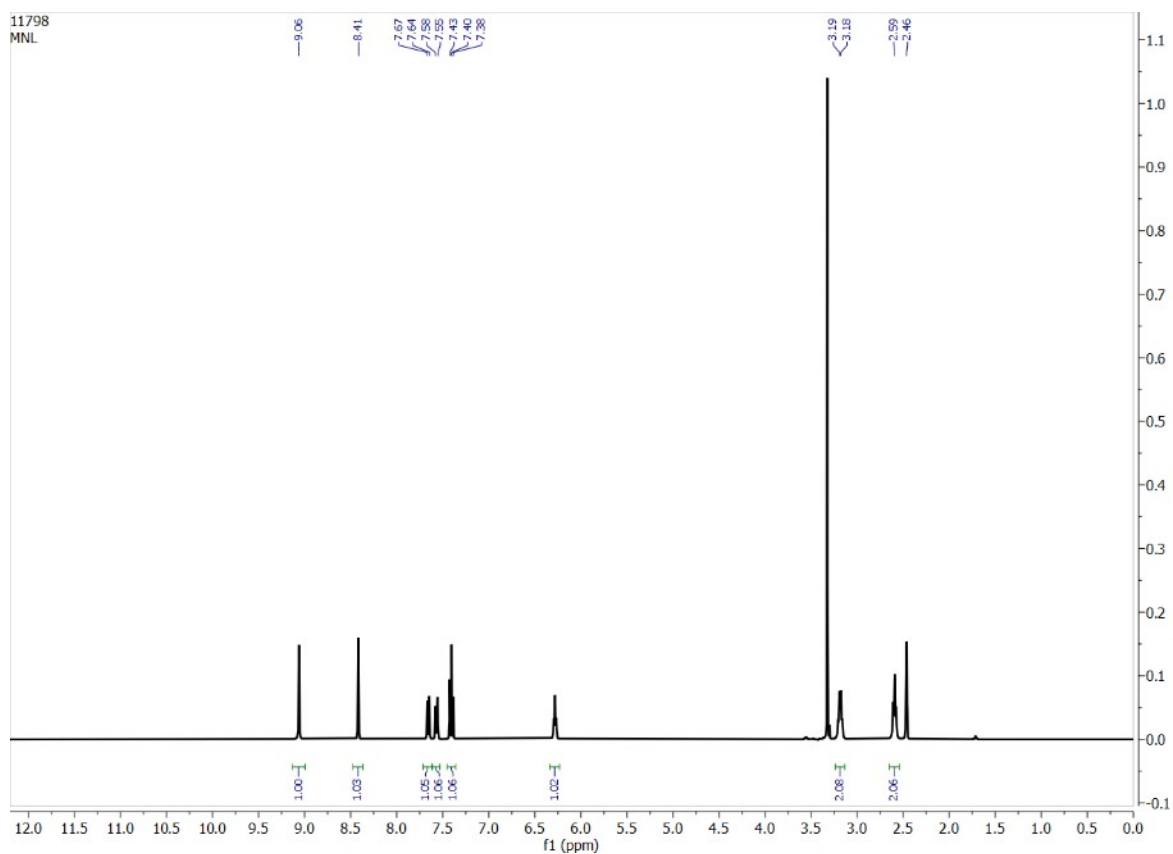

Fig S1.  $^1$ H-NMR spectrum of  $L_1$  in DMSO- $D_6$ .

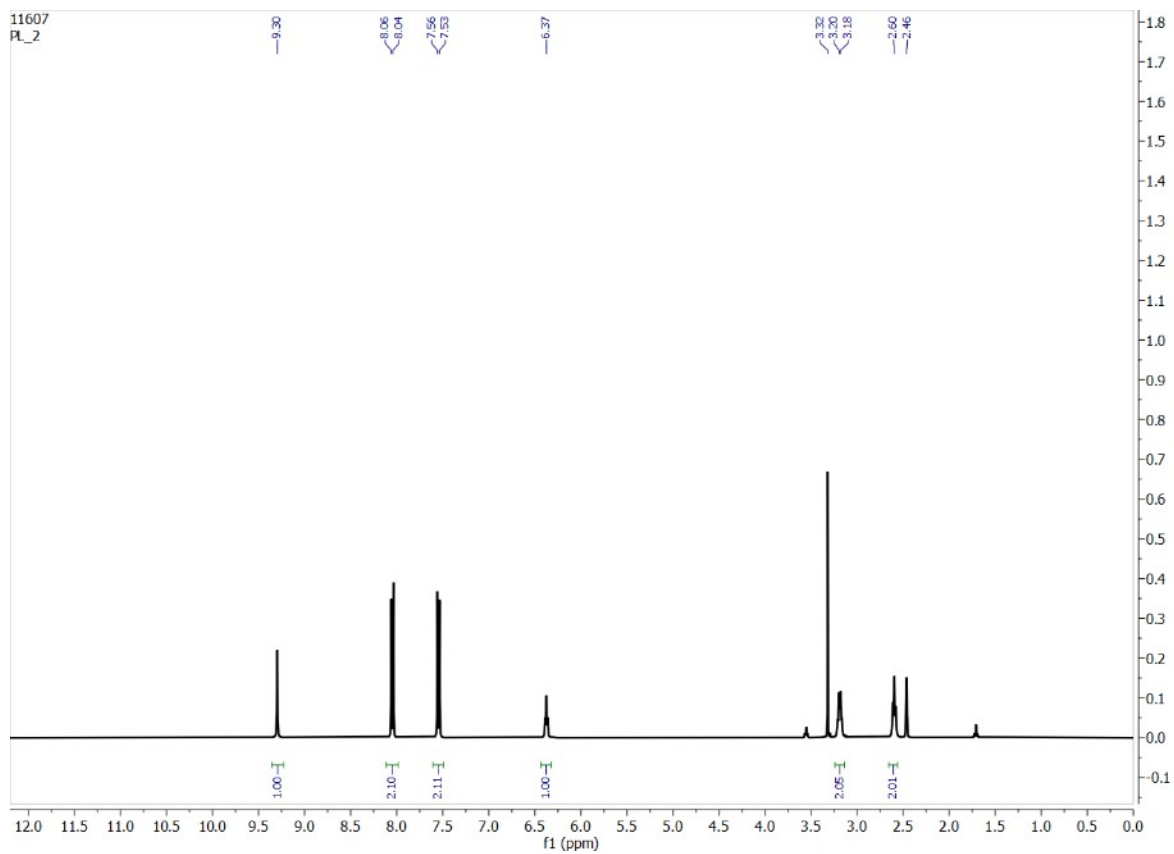

**Fig S2.**  $^1\text{H}$ -NMR spectrum of  $\text{L}_2$  in  $\text{DMSO-D}_6$ .

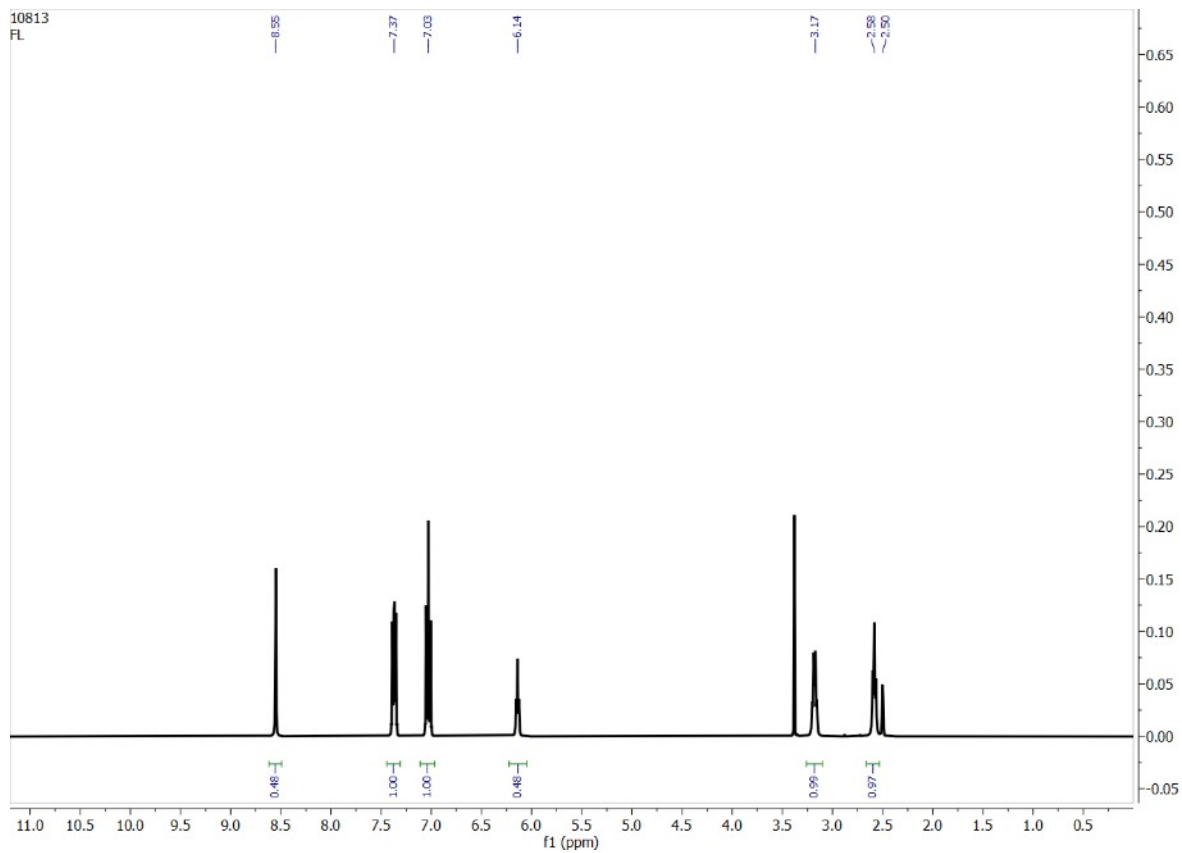

**Fig S3.**  $^1\text{H}$ -NMR spectrum of  $\text{L}_3$  in  $\text{DMSO-D}_6$ .

### 3. Synthesis and characterization of tris-thiourea receptor ( $L_4$ )

Receptors  $L_3$  was synthesized by the reaction of tris(2-aminoethyl)amine with 4-nitrophenylisothiocyanate in a 1:3.1 molar ratio at room temperature (Scheme S1).<sup>2</sup> In a 50 mL flat bottom flask, 146  $\mu$ L of tris(2-aminoethyl)amine (1 mmol) was dissolved in 10 mL of tetrahydrofuran (THF) and 560 mg of 4-nitrophenylisothiocyanate (3.1 mmol) was added into the above solution mixture and was allowed to stir at room temperature (25–30  $^{\circ}$ C) for about 12 hours. The solvent was evaporated under reduced pressure at 40  $^{\circ}$ C to obtain a thick oily compound, which was then treated with 20 mL of methanol to precipitate the final product. The pale-yellow precipitate obtained was then filtered and washed with 20 mL methanol and dried at room temperature. Yield: 82% (percentage yield reported are the average value of three reactions).

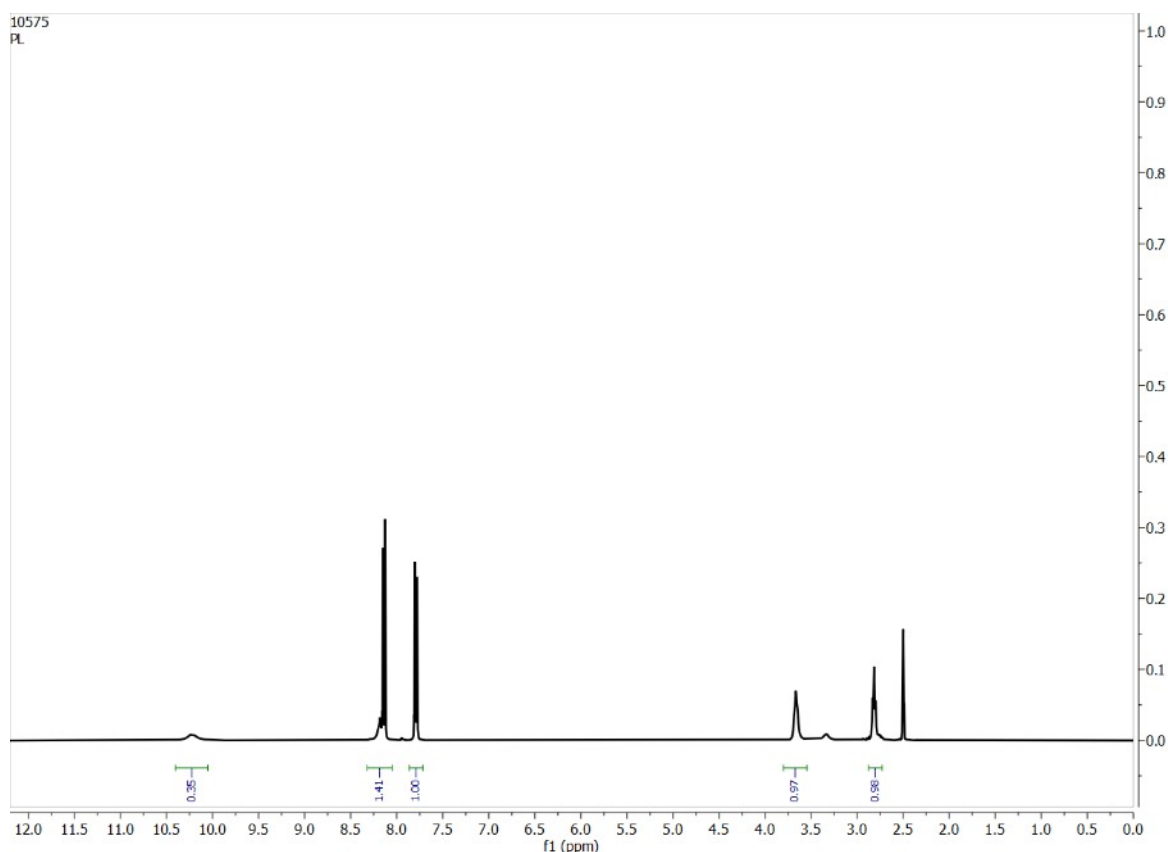

Fig S4.  $^1$ H-NMR spectrum of  $L_4$  in DMSO- $D_6$ .

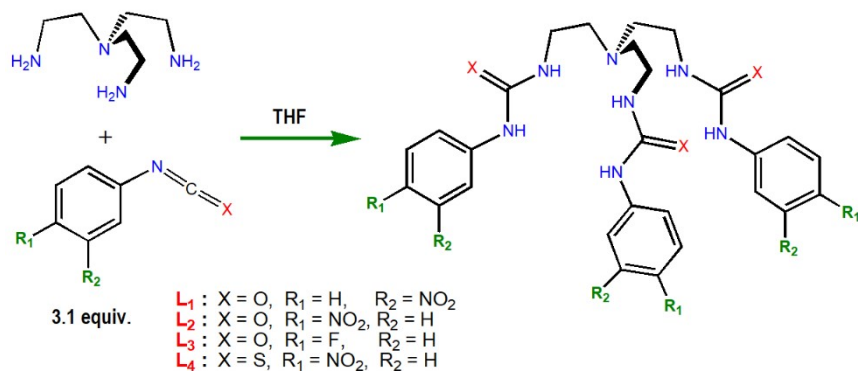

**Scheme S1.** Synthesis of urea and thiourea-based tripodal receptors.

#### 4. Synthesis of oxoanion complexes of tris-urea receptors ( $L_1$ - $L_3$ )

The receptor-oxoanion complexes were obtained by liquid-liquid extraction experiments. In a typical liquid-liquid extraction experiment,  $L_1/L_2/L_3$  (100 mg) was dissolved in dichloromethane (DCM, 20 mL) in the presence of two equivalents  $(n\text{-Bu}_4\text{N}^+)\text{OH}^-$  and an aqueous solution of an oxoanion (one equivalent of  $\text{Na}_2\text{SO}_4$ ,  $\text{Na}_2\text{SeO}_4$ ,  $\text{Na}_2\text{HPO}_4$ ,  $\text{Na}_2\text{HAsO}_4$  or  $\text{Na}_2\text{CO}_3$  dissolved in 20 mL of deionized water) was added into the DCM solution. The solution mixture was then stirred at room temperature for about an hour and the separated organic layer was washed with 20 mL of deionized water (10 min. of stirring) in each case. The DCM layer was then isolated again using a separating funnel and treated with anhydrous sodium sulfate in each case. The solution was then filtered and evaporated to dryness at room temperature to obtain yellow crystalline powder of the host-guest complex which was characterized by NMR spectroscopy in  $\text{DMSO-D}_6$ .

#### 5. Synthesis of oxoanion complexes of tris-thiourea receptors ( $L_4$ )

The receptor-oxoanion complexes were obtained by liquid-liquid extraction experiments. In a typical liquid-liquid extraction experiment,  $L_4$  (100 mg) was dissolved in dichloromethane (DCM, 20 mL) in the presence of three equivalents  $(n\text{-Bu}_4\text{N}^+)\text{CH}_3\text{CO}_2^-$  and an aqueous solution of an oxoanion (one equivalent of  $\text{Na}_2\text{SO}_4$ ,  $\text{Na}_2\text{SeO}_4$ ,  $\text{Na}_2\text{HPO}_4$ ,  $\text{Na}_2\text{HAsO}_4$  or  $\text{Na}_2\text{CO}_3$  dissolved in 20 mL of deionized water) was added into the DCM solution. The solution mixture was then stirred at room temperature for about an hour and the separated organic layer was washed with 20 mL of deionized water (10 min. of stirring) in each case. The DCM layer was then isolated again using a separating funnel and treated with anhydrous sodium sulfate in each case. The solution was then filtered and evaporated to dryness at room temperature to obtain yellow crystalline powder of the host-guest complex which was characterized by NMR spectroscopy in  $\text{DMSO-D}_6$ .

**Competitive liquid-liquid extraction experiments:** In a typical competitive liquid-liquid extraction experiment for the selective sulfate extraction,  $L_1/L_2$  (100 mg) was dissolved in dichloromethane (DCM, 20 mL) in the presence of two equivalents  $(n\text{-Bu}_4\text{N}^+)\text{OH}^-$  and an aqueous solution mixture of sulfate and one or more competing anions ( $\text{Na}^+$  salts dissolved in 20 mL of deionized water) was added into the DCM solution. The solution mixture was then stirred at room temperature for about an hour and the DCM layer was isolated using a separating funnel and treated with anhydrous sodium sulfate in each case. The solution was then filtered and evaporated to dryness at room temperature to obtain yellow crystalline powder of the receptor-sulfate complex which was characterized by NMR spectroscopy in  $\text{DMSO-D}_6$ . The yield of the isolated complex was calculated with respect to the receptor. Similar experiments have also been performed with receptors  $L_3$  and  $L_4$  for sulfate and phosphate extractions, respectively.

## 6. Anion complexes of L<sub>1</sub>: Characterization by NMR spectroscopy

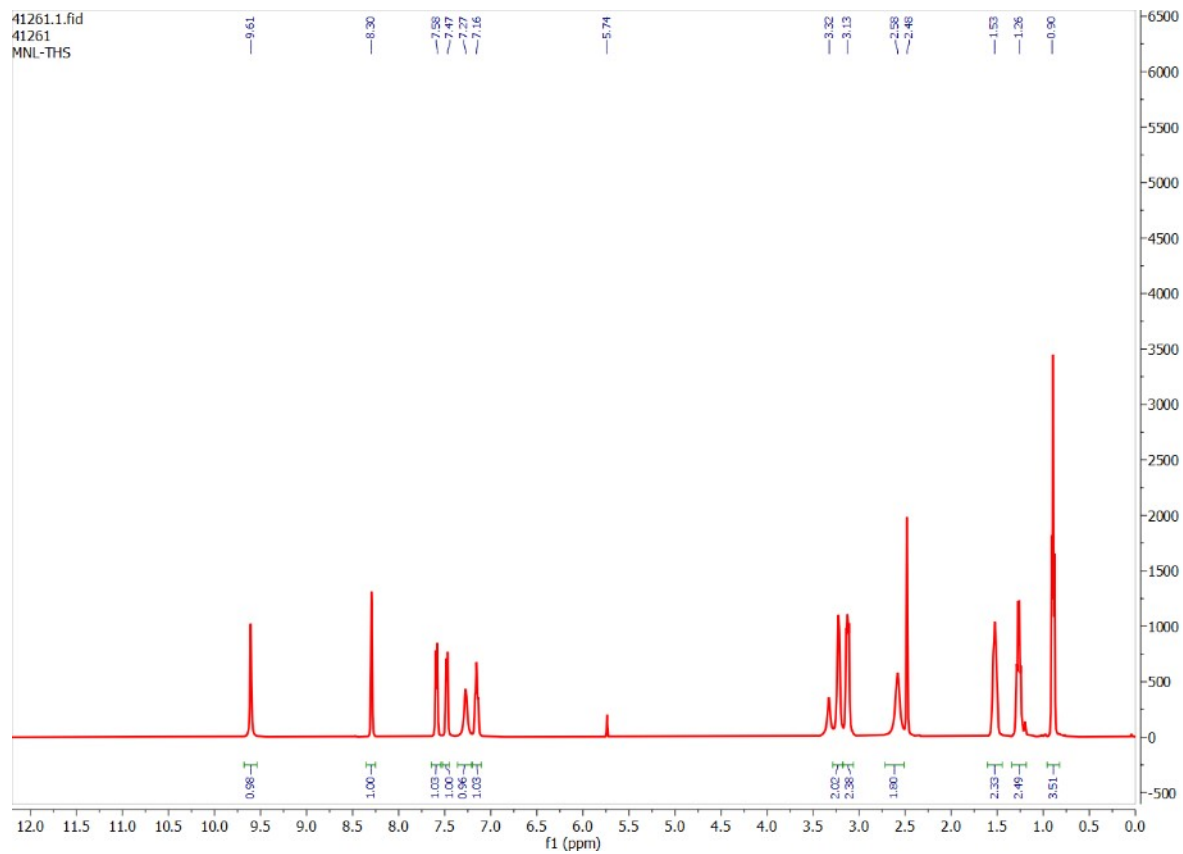

**Fig. S5.** <sup>1</sup>H-NMR spectrum of sulfate complex, [(n-Bu<sub>4</sub>N)<sub>2</sub>(2L<sub>1</sub>·SO<sub>4</sub>)] in DMSO-D<sub>6</sub>.

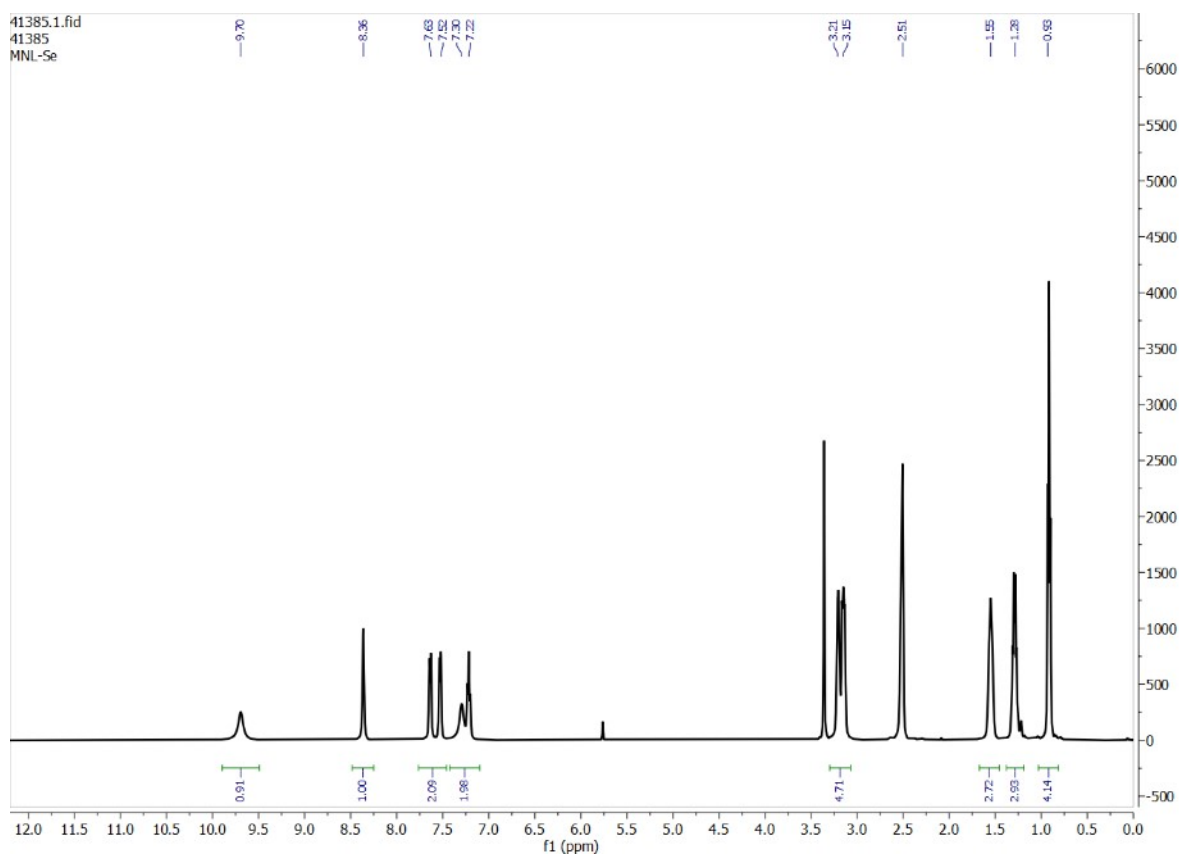

**Fig. S6.**  $^1\text{H-NMR}$  spectrum of selenate complex,  $[(n\text{-Bu}_4\text{N})_2(2\text{L}_1\cdot\text{SeO}_4)]$  in  $\text{DMSO-D}_6$ .

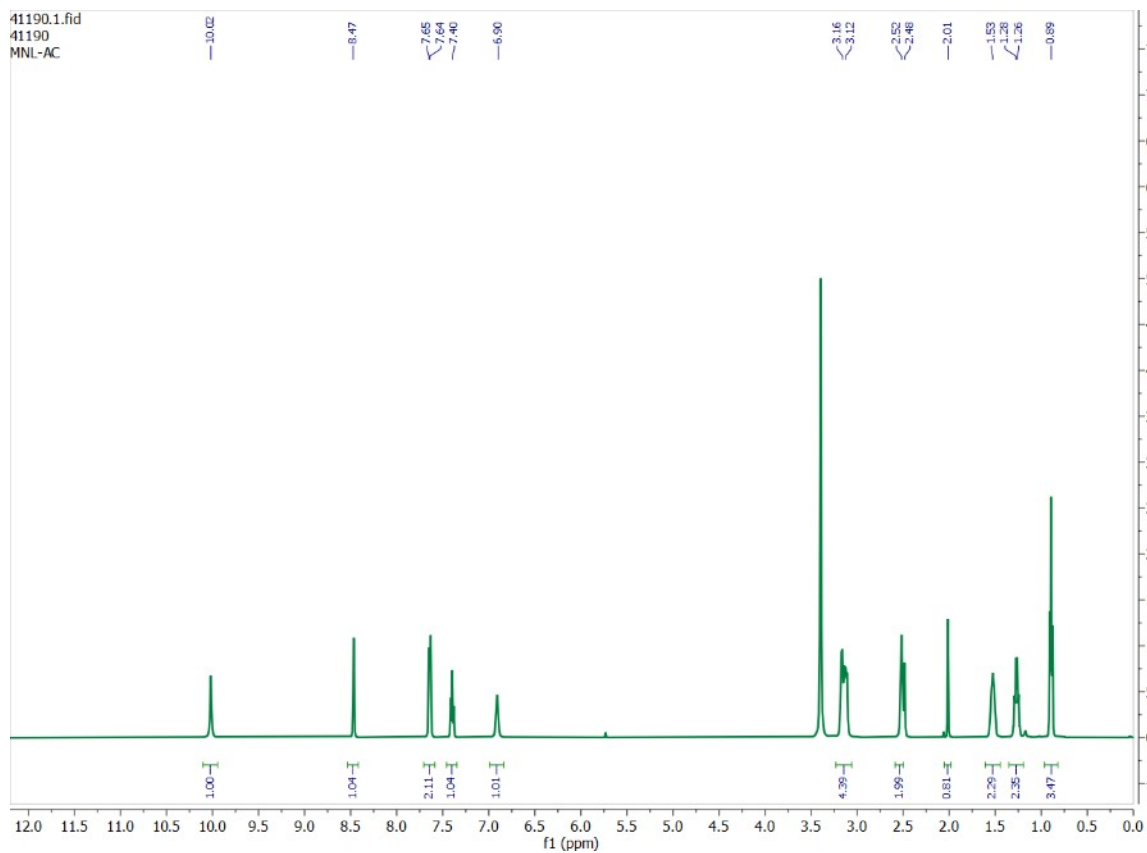

**Fig. S7.**  $^1\text{H-NMR}$  spectrum of acetate complex,  $[(n\text{-Bu}_4\text{N})(\text{L}_1\cdot\text{CH}_3\text{CO}_2)]$  in  $\text{DMSO-D}_6$ .

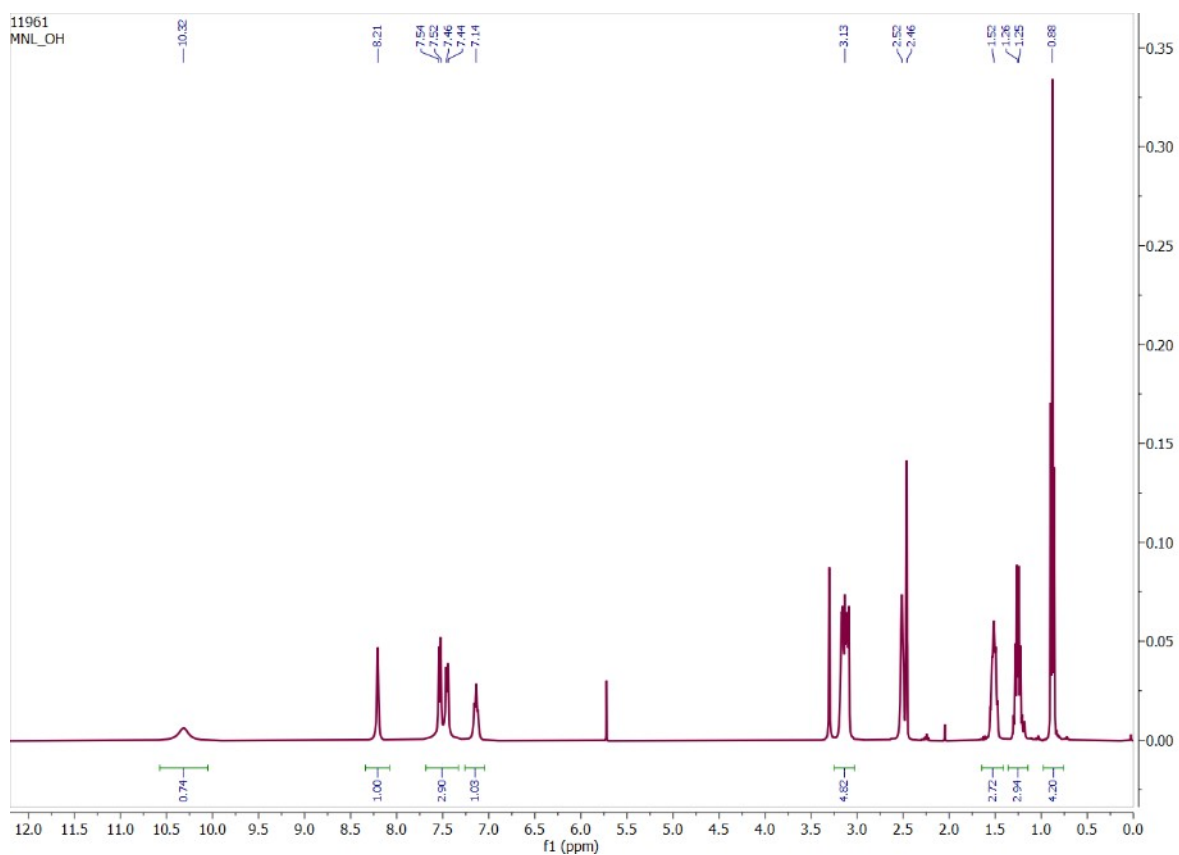

**Fig. S8.**  $^1\text{H-NMR}$  spectrum of hydroxide complex,  $[(n\text{-Bu}_4\text{N})(\text{L}_1\cdot\text{OH})]$  in  $\text{DMSO-D}_6$ .

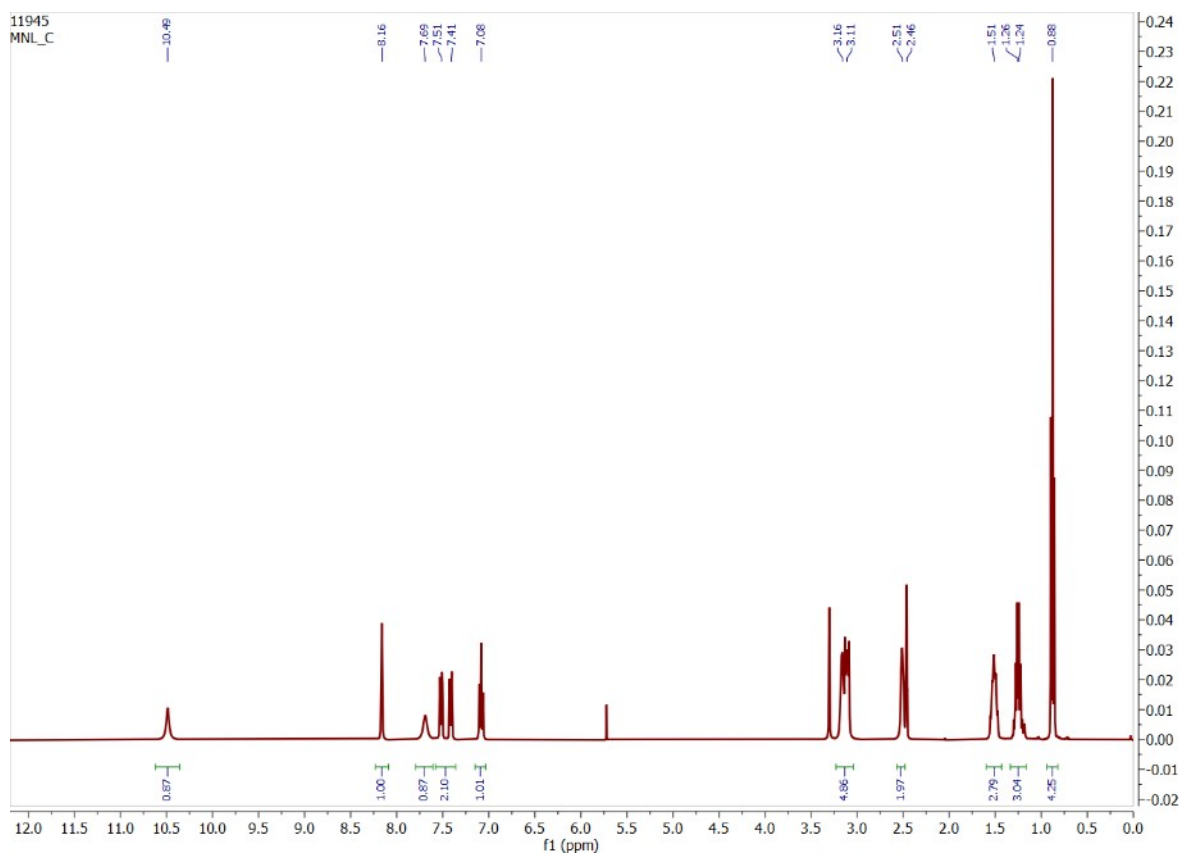

**Fig. S9.**  $^1\text{H-NMR}$  spectrum of carbonate complex,  $[(n\text{-Bu}_4\text{N})_2(2\text{L}_1\cdot\text{CO}_3)]$  in  $\text{DMSO-D}_6$ .



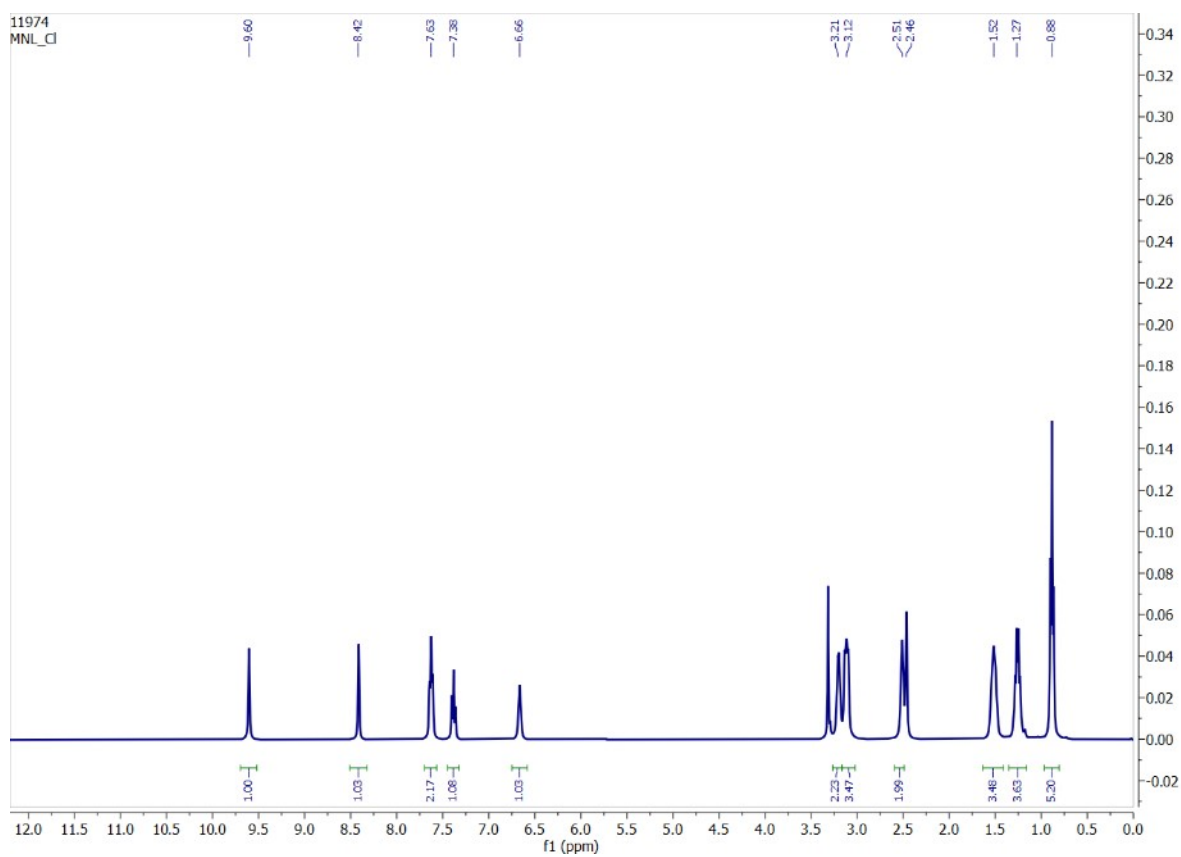

**Fig. S10.**  $^1\text{H-NMR}$  spectrum of chloride complex,  $[(n\text{-Bu}_4\text{N})(\text{L}_1\cdot\text{Cl})]$  in  $\text{DMSO-D}_6$ .

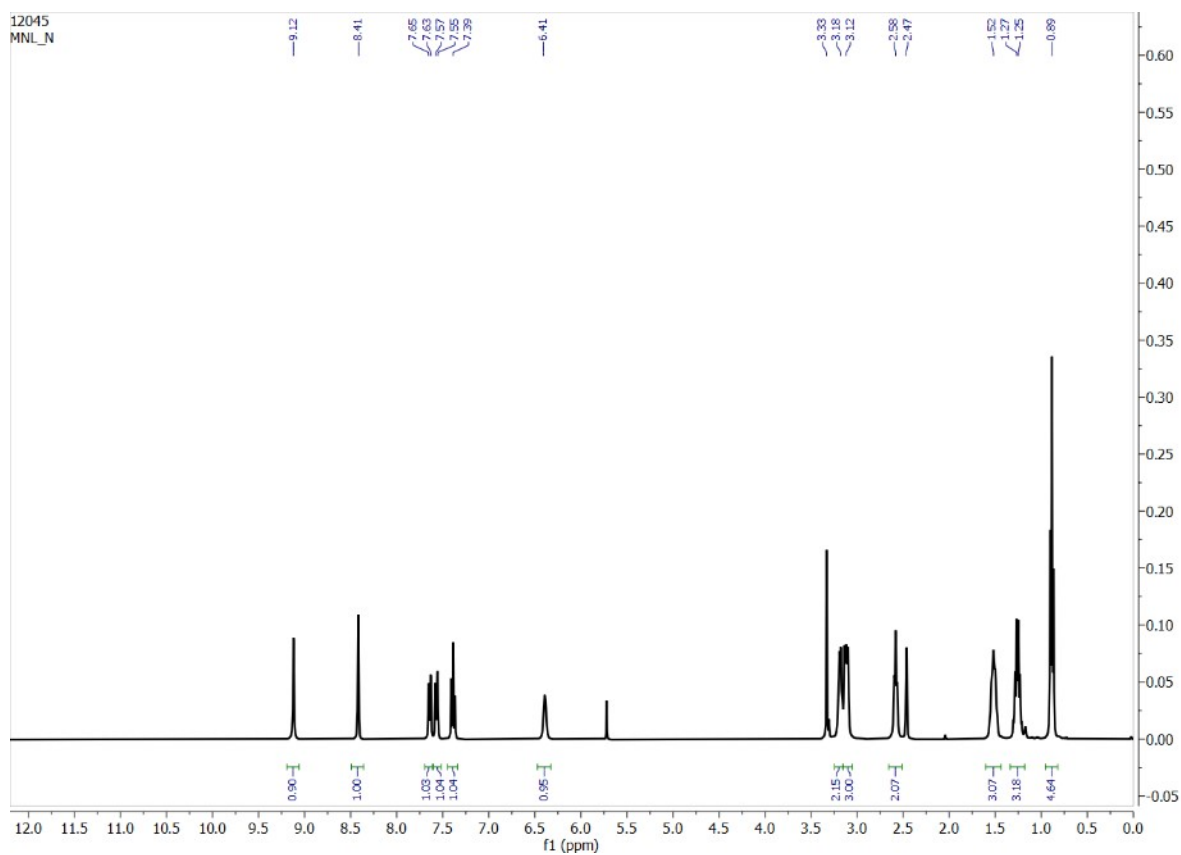

**Fig. S11.**  $^1\text{H-NMR}$  spectrum of nitrate complex,  $[(n\text{-Bu}_4\text{N})(\text{L}_1\cdot\text{NO}_3)]$  in  $\text{DMSO-D}_6$ .

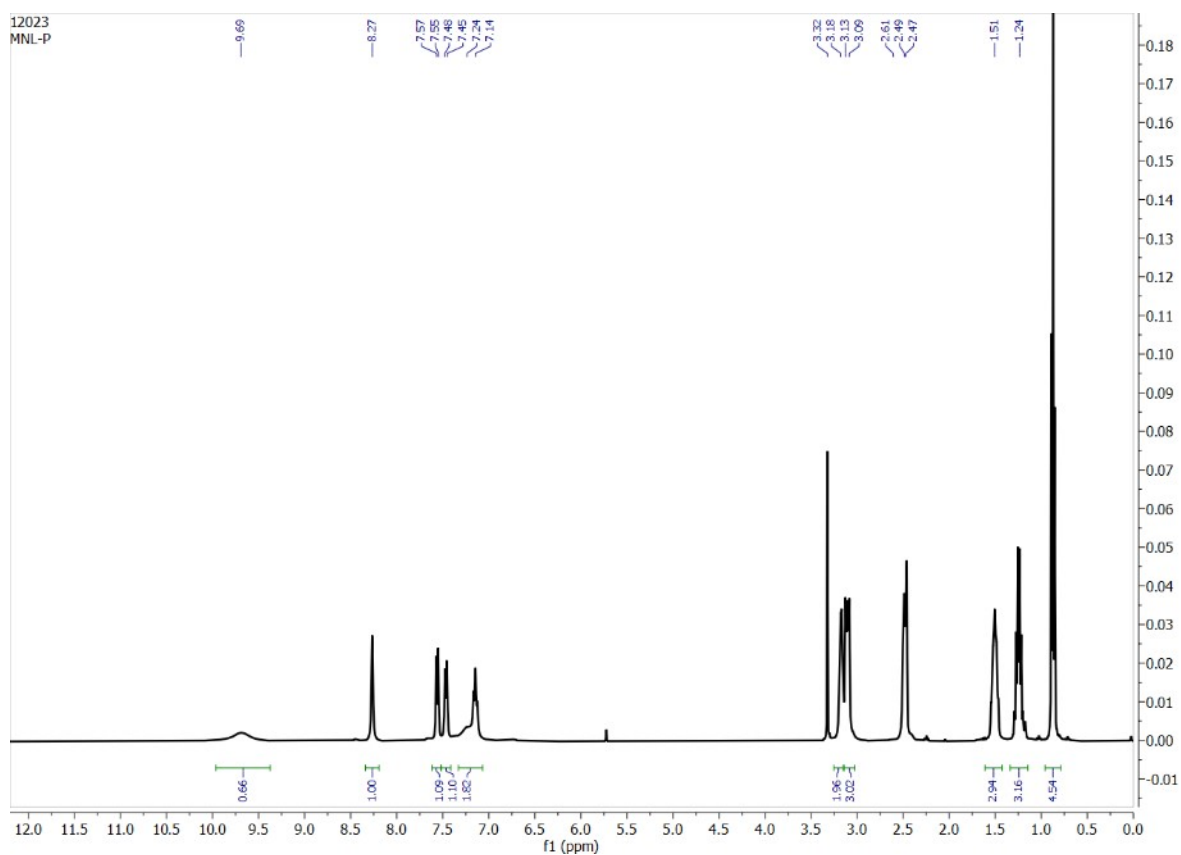

**Fig. S12.**  $^1\text{H-NMR}$  spectrum of phosphate complex, mixture of  $[(n\text{-Bu}_4\text{N})_2(2\text{L}_1\cdot\text{HPO}_4)] + [(n\text{-Bu}_4\text{N})_3(2\text{L}_1\cdot\text{PO}_4)]$  in  $\text{DMSO-D}_6$ .

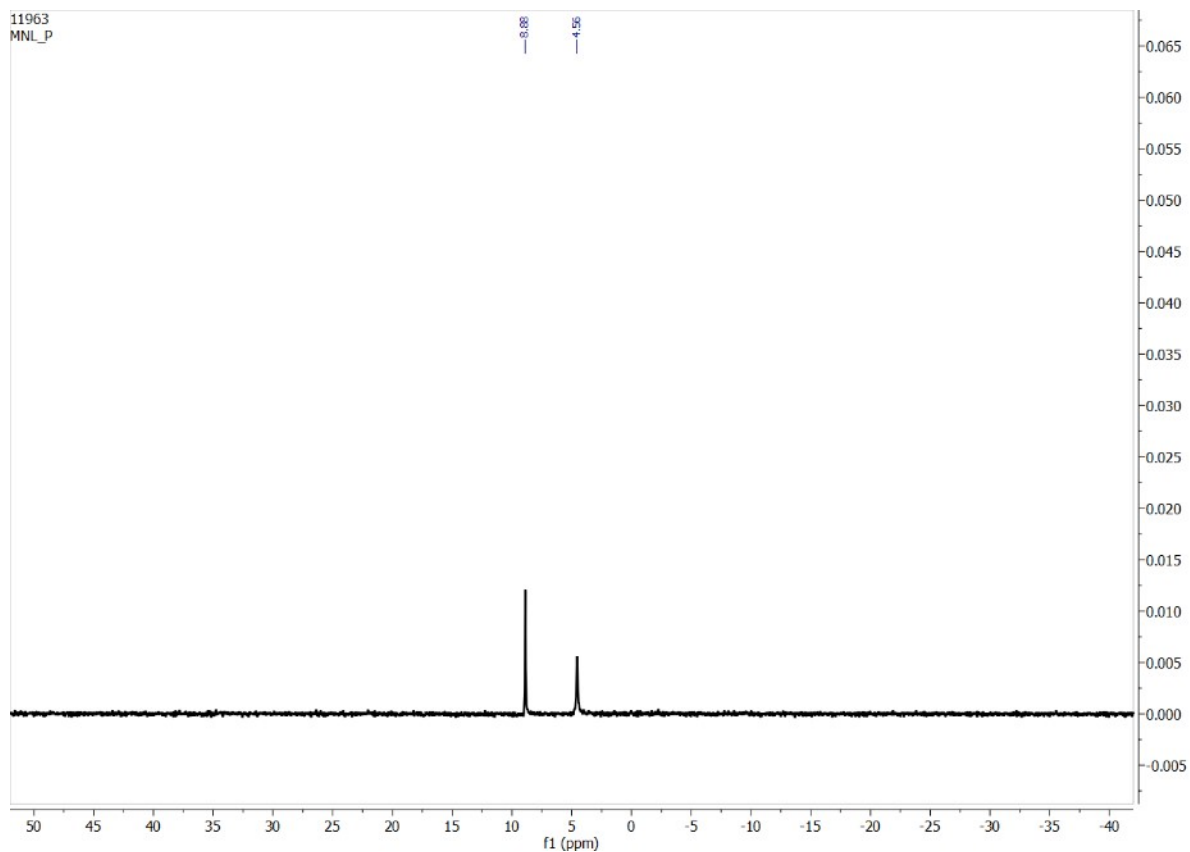

**Fig. S13.**  $^{31}\text{P}$ -NMR spectrum of phosphate complex in  $\text{DMSO-D}_6$ , showing the presence of two phosphate species i.e., mixture of  $[(n\text{-Bu}_4\text{N})_2(2\text{L}_1\cdot\text{HPO}_4)]$  and  $[(n\text{-Bu}_4\text{N})_3(2\text{L}_1\cdot\text{PO}_4)]$ .

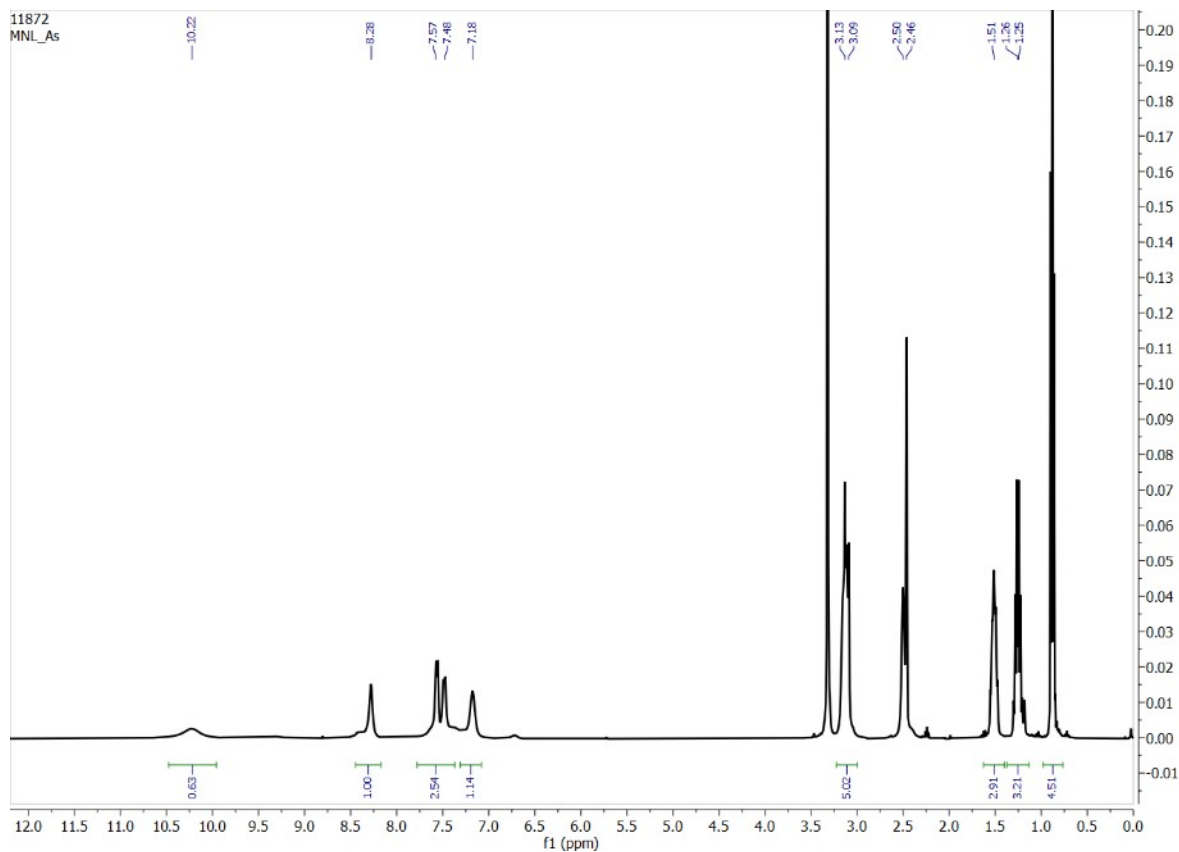

**Fig. S14.**  $^1\text{H}$ -NMR spectrum of arsenate complex,  $[(n\text{-Bu}_4\text{N})_2(2\text{L}_1\cdot\text{HAsO}_4)]$  in  $\text{DMSO-D}_6$ .

## 7. Anion complexes of $\text{L}_2$ : Characterization by NMR spectroscopy

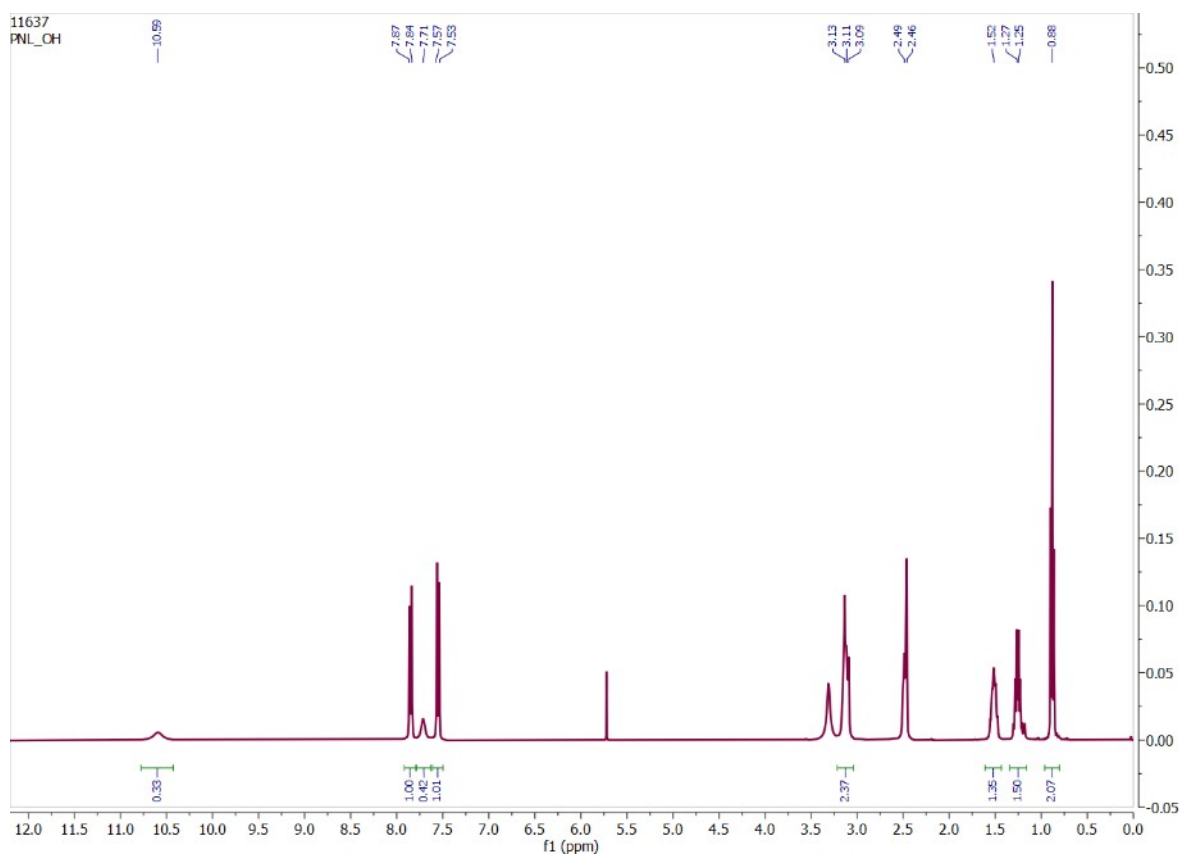

**Fig. S15.**  $^1\text{H-NMR}$  spectrum of hydroxide complex,  $[(n\text{-Bu}_4\text{N})(\text{L}_2\cdot\text{OH})]$  in  $\text{DMSO-D}_6$ .

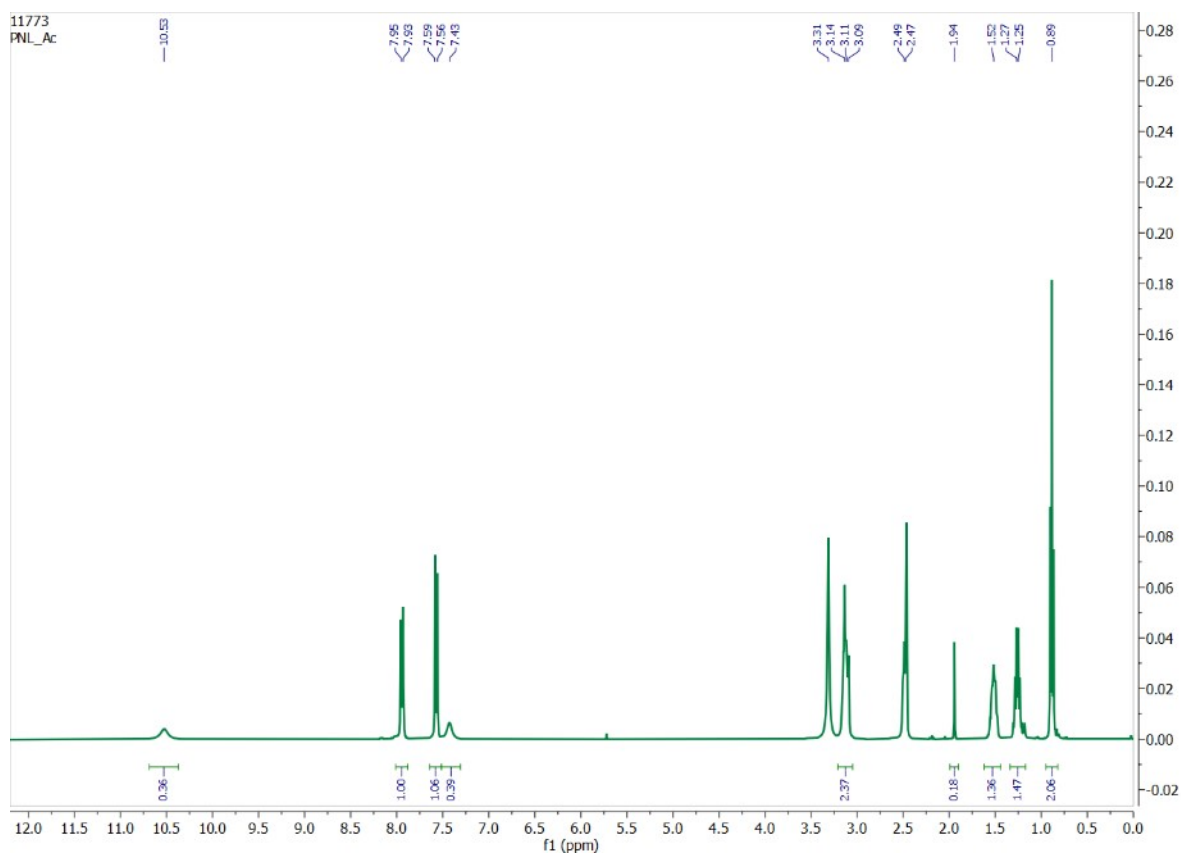

**Fig. S16.**  $^1\text{H-NMR}$  spectrum of acetate complex,  $[(n\text{-Bu}_4\text{N})(\text{L}_2\cdot\text{CH}_3\text{CO}_2)]$  in  $\text{DMSO-D}_6$ .

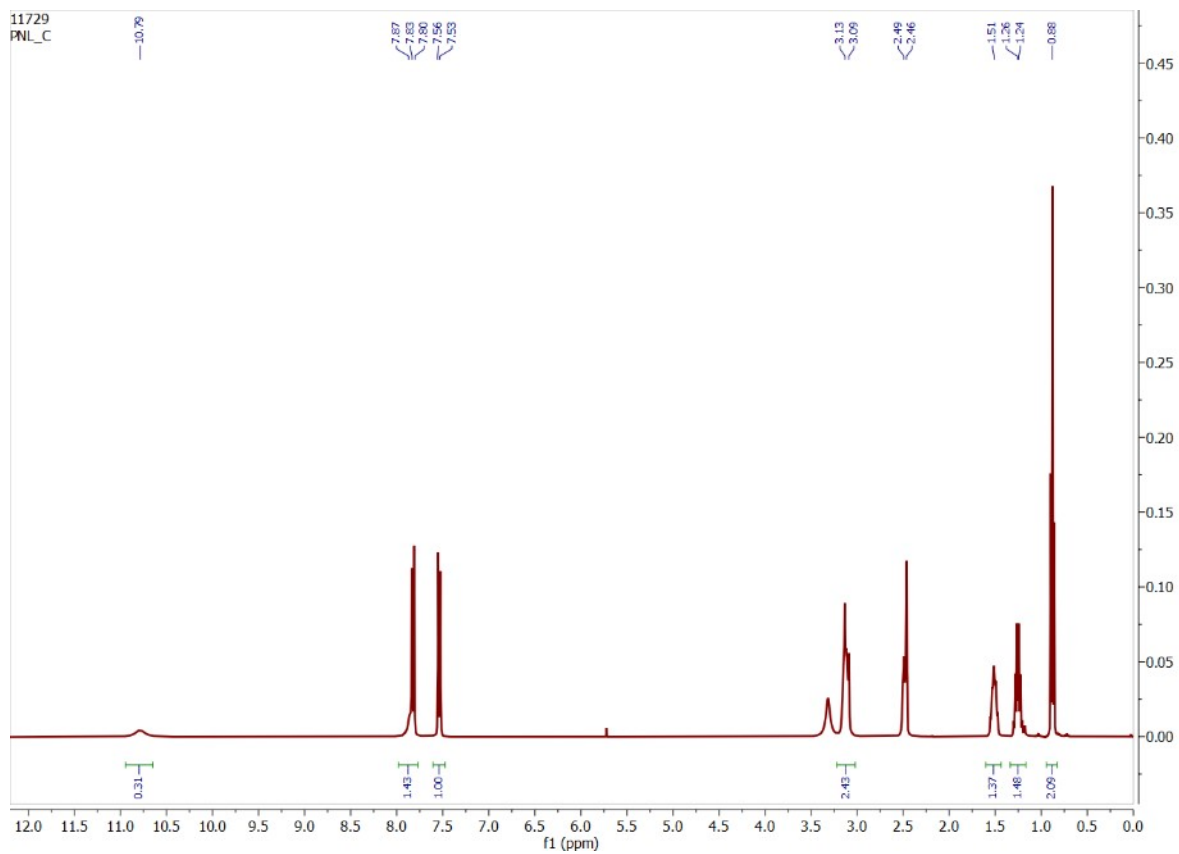

**Fig. S17.**  $^1\text{H-NMR}$  spectrum of carbonate complex,  $[(n\text{-Bu}_4\text{N})_2(2\text{L}_2\cdot\text{CO}_3)]$  in  $\text{DMSO-D}_6$ .

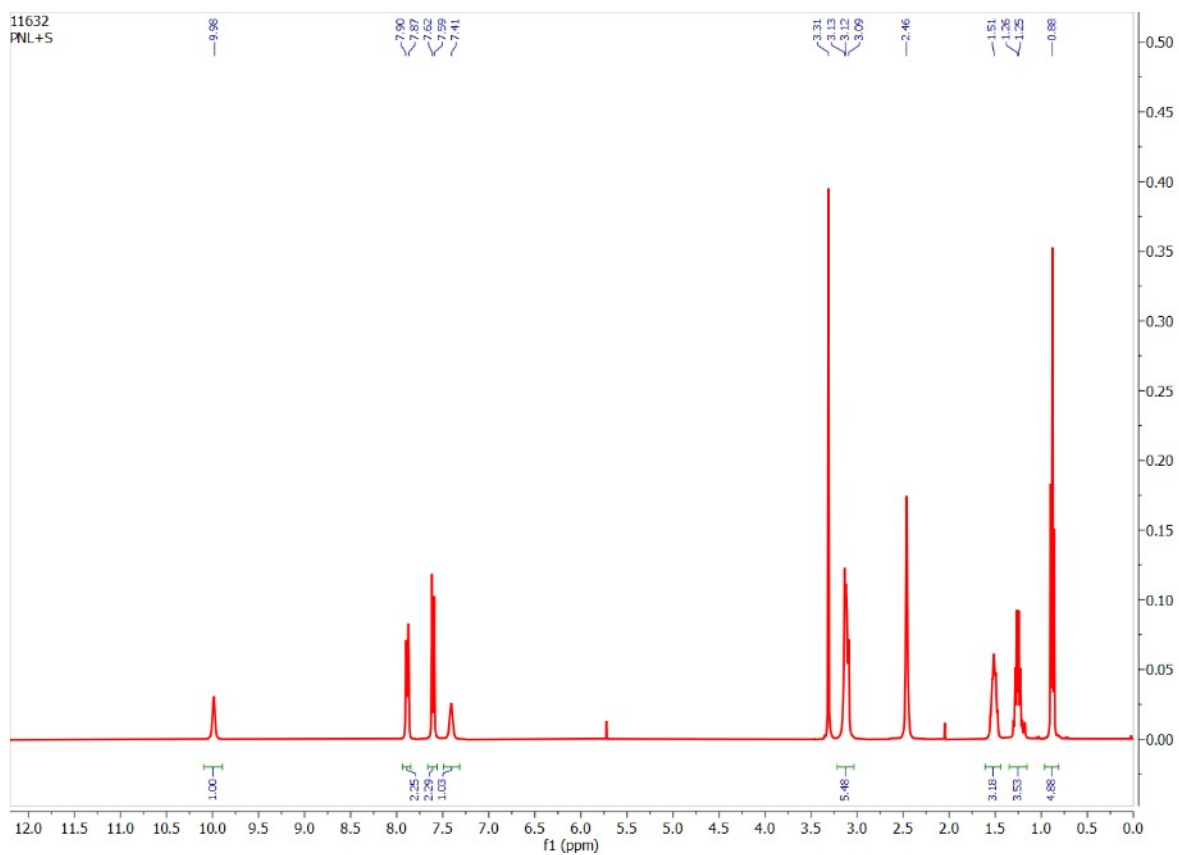

**Fig. S18.**  $^1\text{H-NMR}$  spectrum of sulfate complex,  $[(n\text{-Bu}_4\text{N})_2(2\text{L}_2\cdot\text{SO}_4)]$  in  $\text{DMSO-D}_6$ .

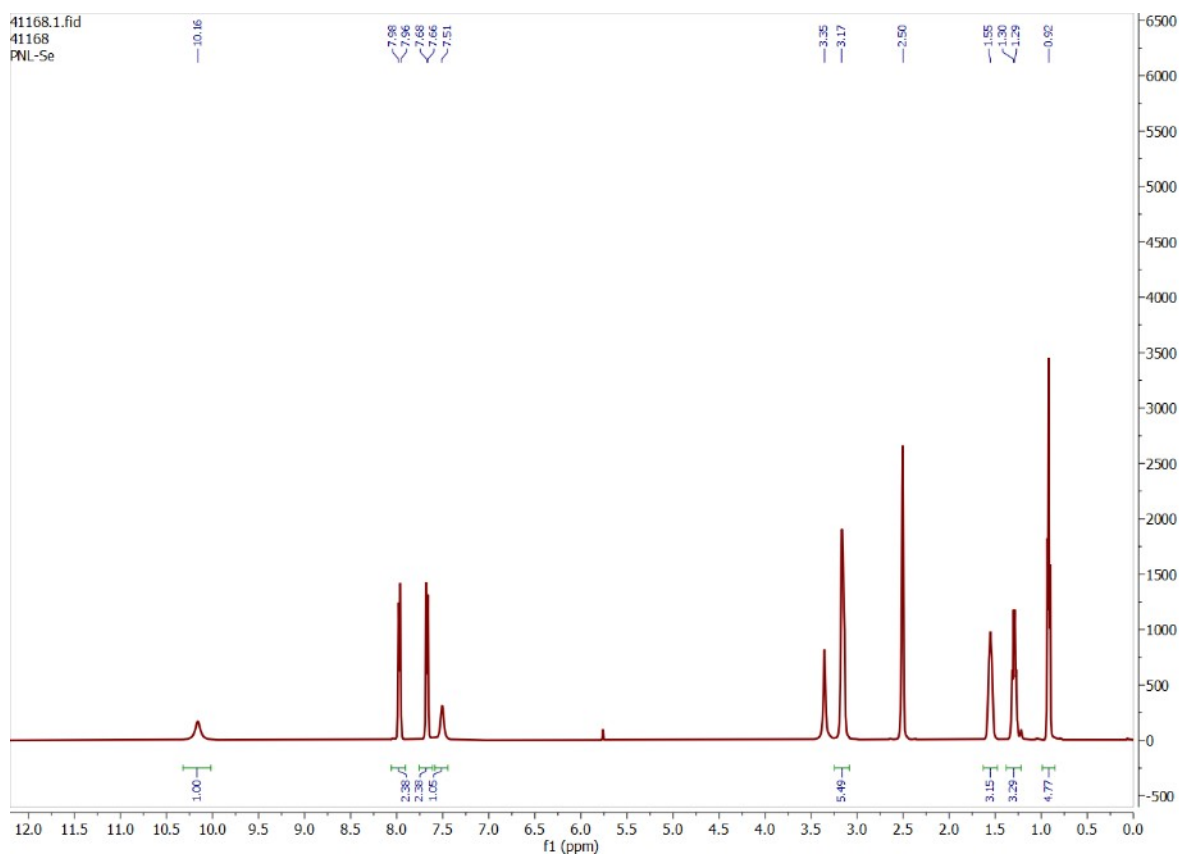

**Fig. S19.**  $^1\text{H-NMR}$  spectrum of selenate complex,  $[(n\text{-Bu}_4\text{N})_2(2\text{L}_2\cdot\text{SeO}_4)]$  in  $\text{DMSO-D}_6$ .

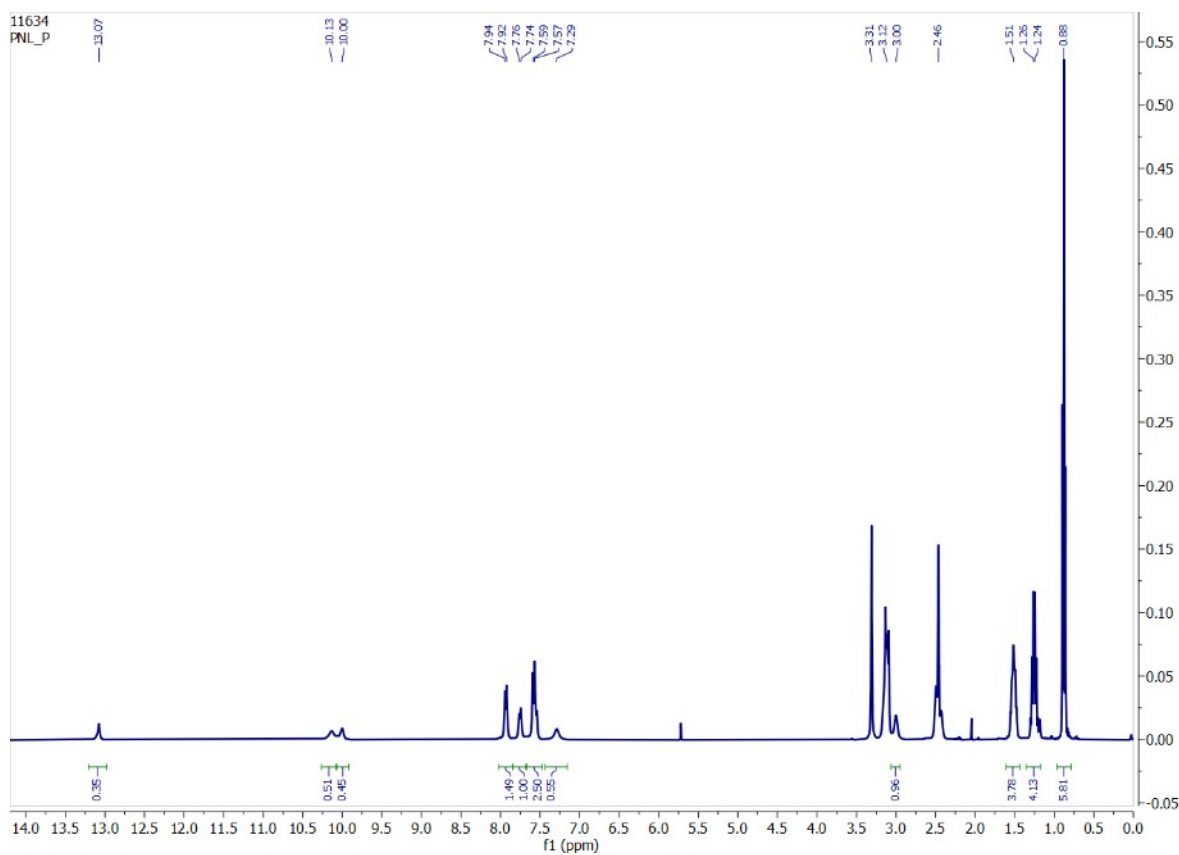

**Fig. S20.**  $^1\text{H-NMR}$  spectrum of phosphate complex in  $\text{DMSO-D}_6$ , two sets of urea -NH and aromatic -CH signals observed due to the presence of a mixture of  $[(n\text{-Bu}_4\text{N})_2(2\text{L}_2\cdot\text{HPO}_4)]$  and  $[(n\text{-Bu}_4\text{N})_3(2\text{L}_2\cdot\text{PO}_4)]$ .

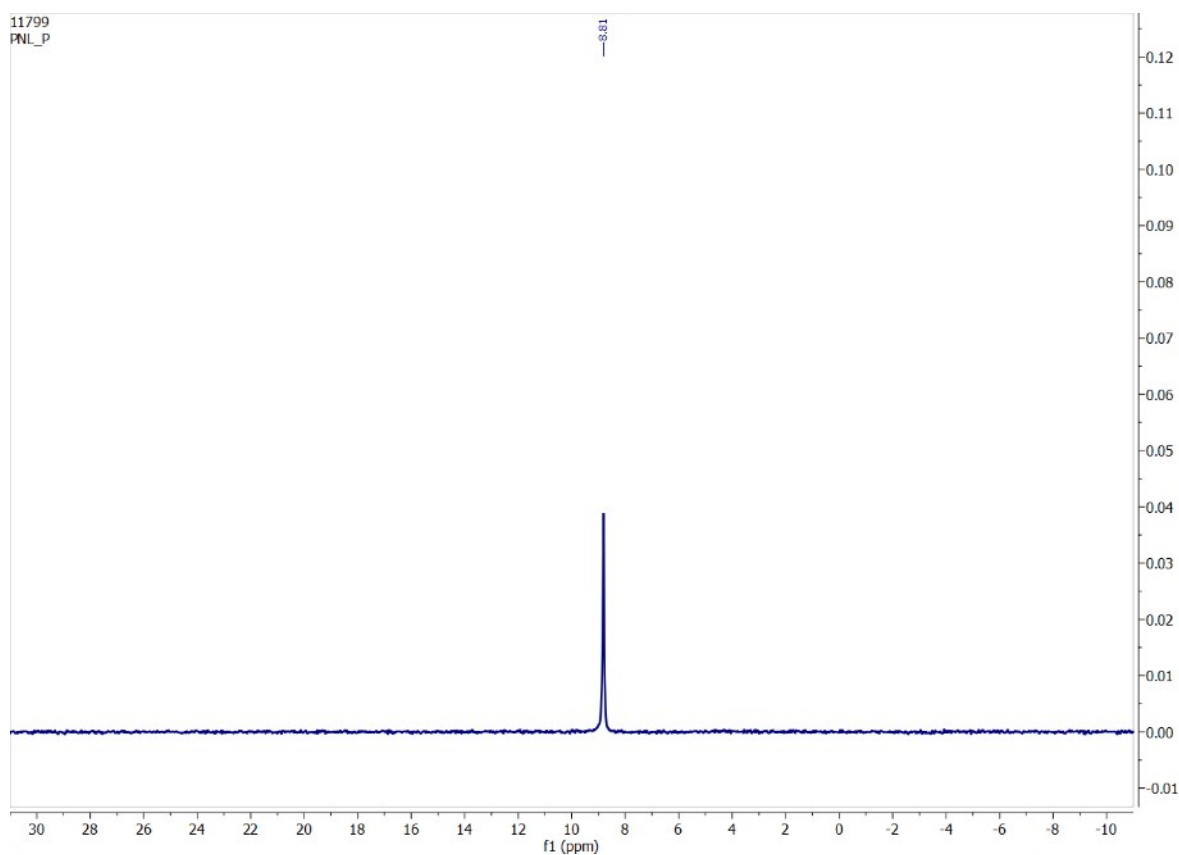

**Fig. S21.**  $^{31}\text{P}$ -NMR spectrum of phosphate complex in  $\text{DMSO-D}_6$ , one signal observed for a mixture of  $[(\text{n-Bu}_4\text{N})_2(2\text{L}_2\cdot\text{HPO}_4)]$  and  $[(\text{n-Bu}_4\text{N})_3(2\text{L}_2\cdot\text{PO}_4)]$ .

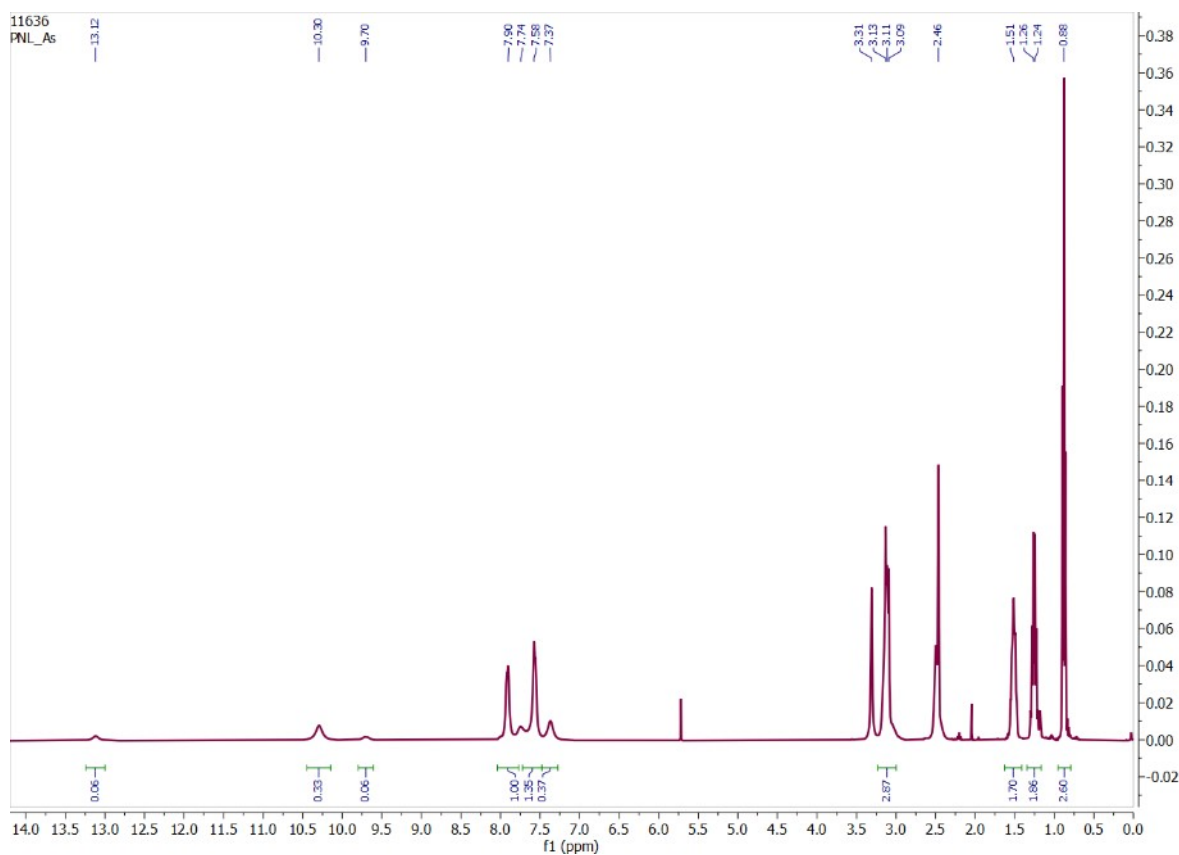

**Fig. S22.**  $^1\text{H}$ -NMR spectrum of arsenate complex in  $\text{DMSO-D}_6$ , two sets of urea -NH and aromatic -CH signals observed due to the presence of a mixture of  $[(\text{n-Bu}_4\text{N})_2(2\text{L}_2\cdot\text{HASO}_4)]$  and  $[(\text{n-Bu}_4\text{N})_3(2\text{L}_2\cdot\text{AsO}_4)]$ .

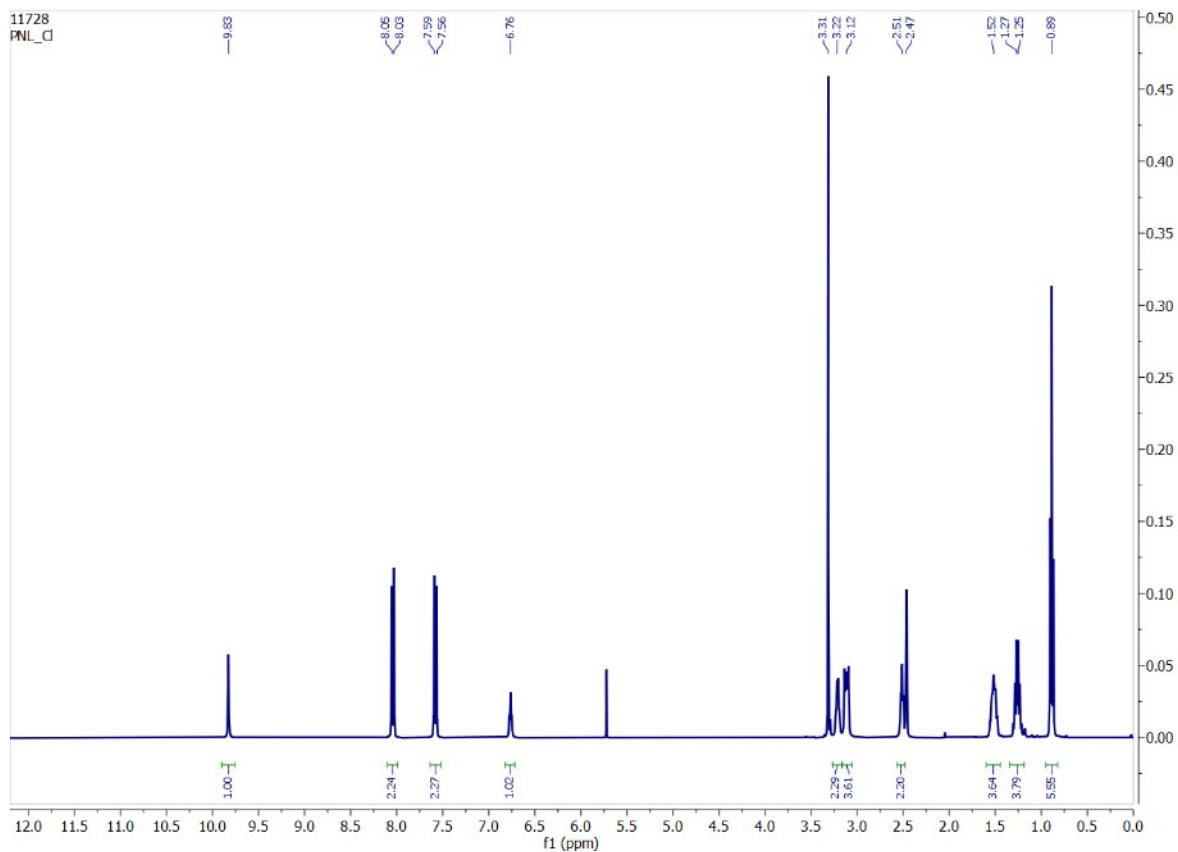

**Fig. S23.**  $^1\text{H-NMR}$  spectrum of chloride complex,  $[(n\text{-Bu}_4\text{N})(\text{L}_2\cdot\text{Cl})]$  in  $\text{DMSO-D}_6$ .

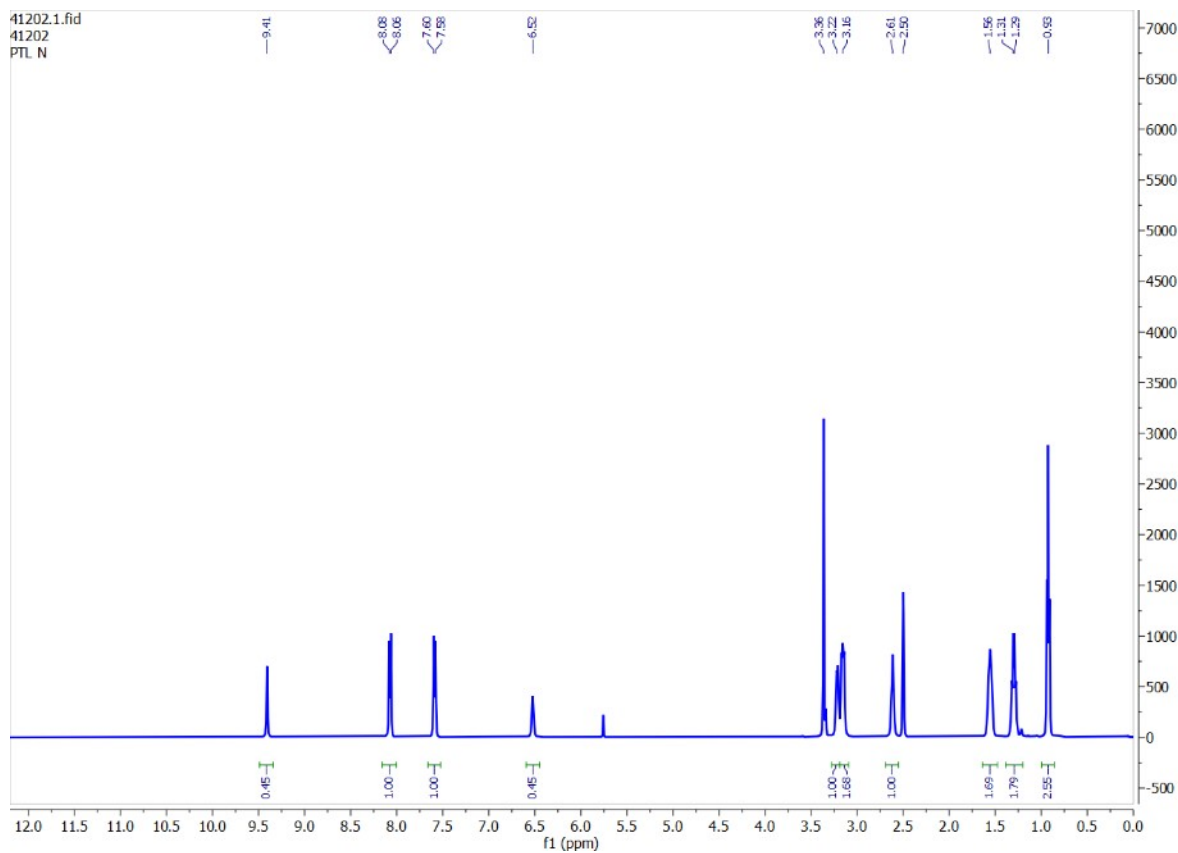

**Fig. S24.**  $^1\text{H-NMR}$  spectrum of nitrate complex,  $[(n\text{-Bu}_4\text{N})(\text{L}_2\cdot\text{NO}_3)]$  in  $\text{DMSO-D}_6$ .



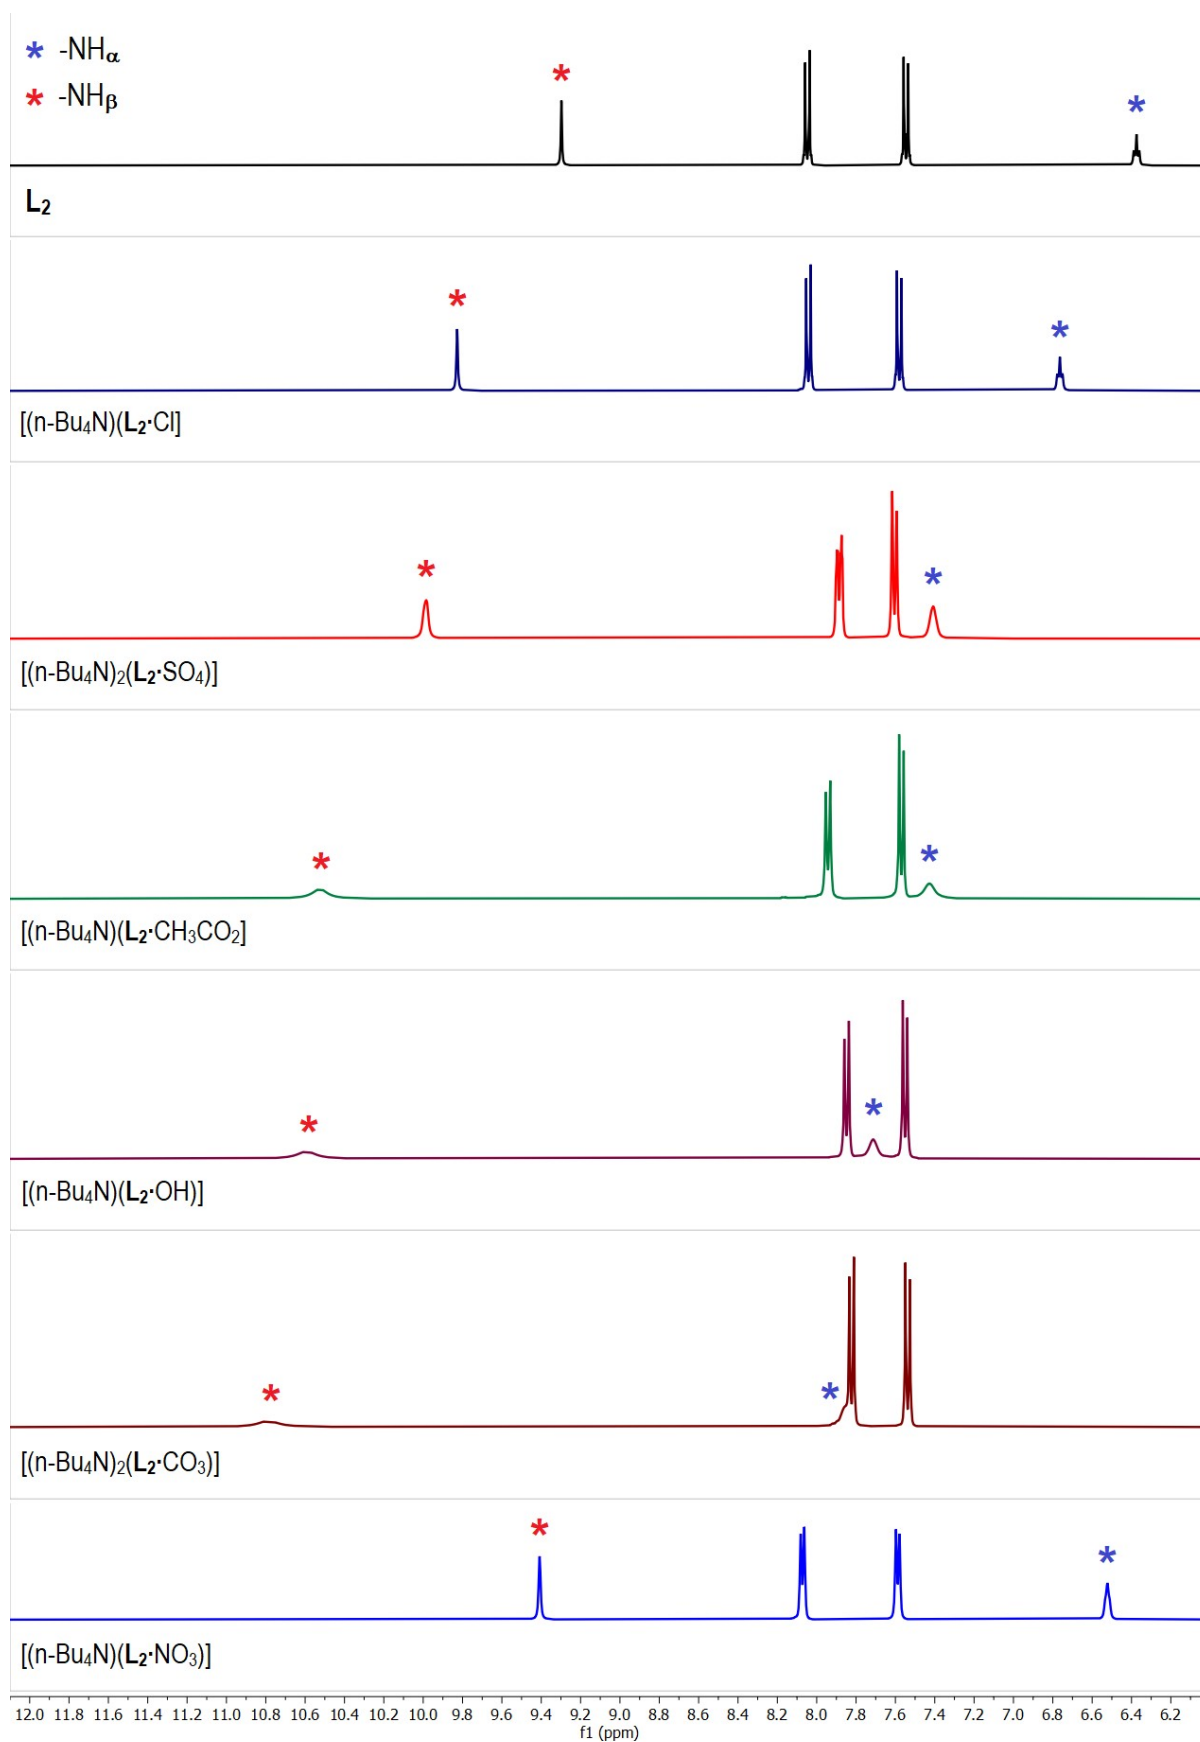

**Fig S25.** Aromatic region of the <sup>1</sup>H-NMR (DMSO-d<sub>6</sub>) spectra of **L<sub>2</sub>** and the receptor-anion complexes showing variable downfield shift of the urea -NH signals in different anion complexes relative to **L<sub>2</sub>**.

## 8. Anion complexes of L<sub>3</sub>: Characterization by NMR spectroscopy

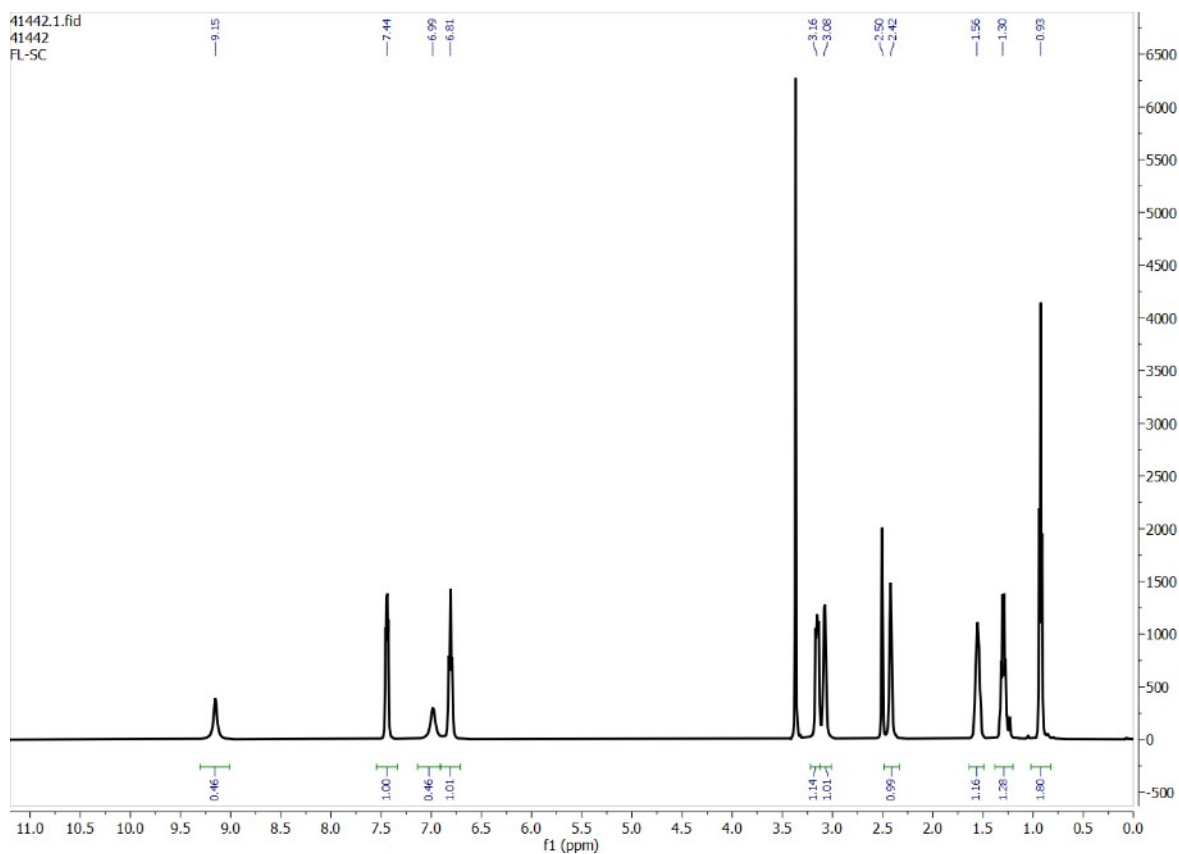

**Fig. S26.** <sup>1</sup>H-NMR spectrum of sulfate complex, [(n-Bu<sub>4</sub>N)<sub>2</sub>(2L<sub>3</sub>·SO<sub>4</sub>)] in DMSO-D<sub>6</sub>.

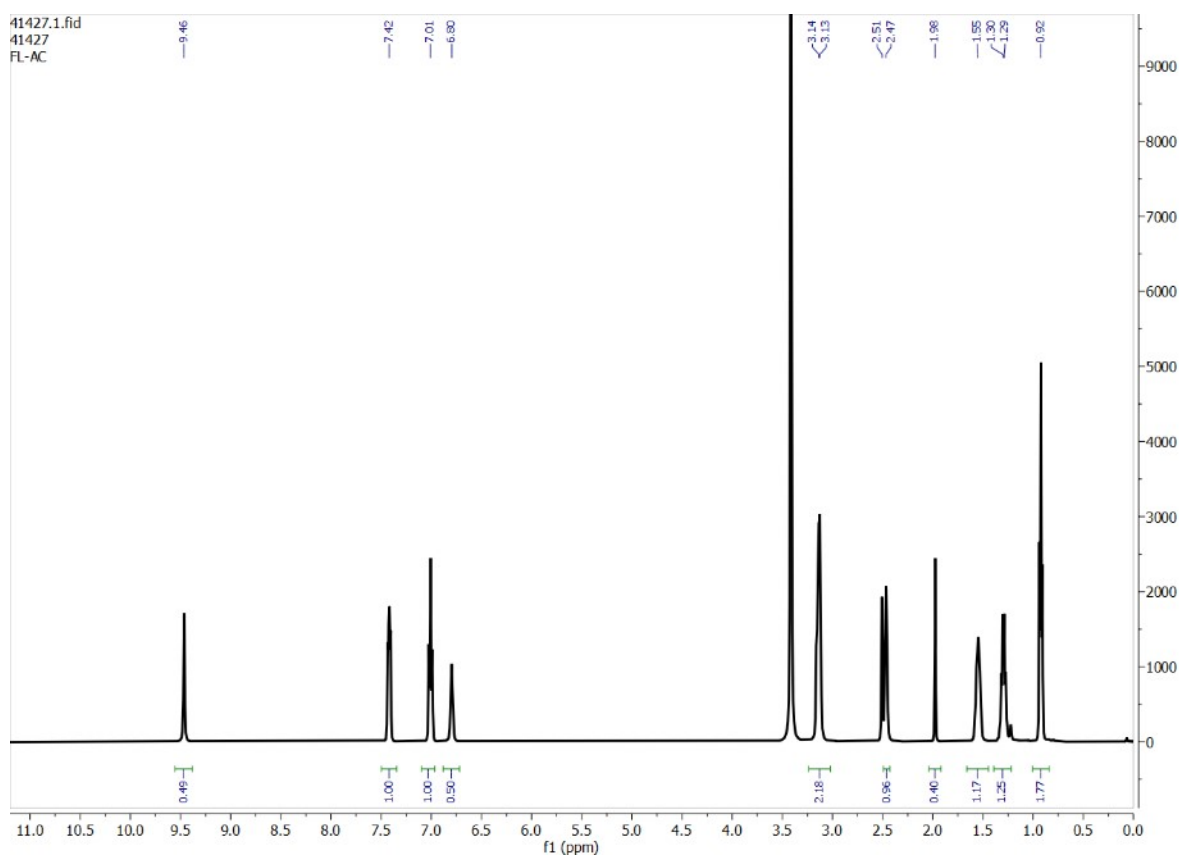

**Fig. S27.** <sup>1</sup>H-NMR spectrum of acetate complex, [(n-Bu<sub>4</sub>N)(L<sub>3</sub>·CH<sub>3</sub>CO<sub>2</sub>)] in DMSO-D<sub>6</sub>.

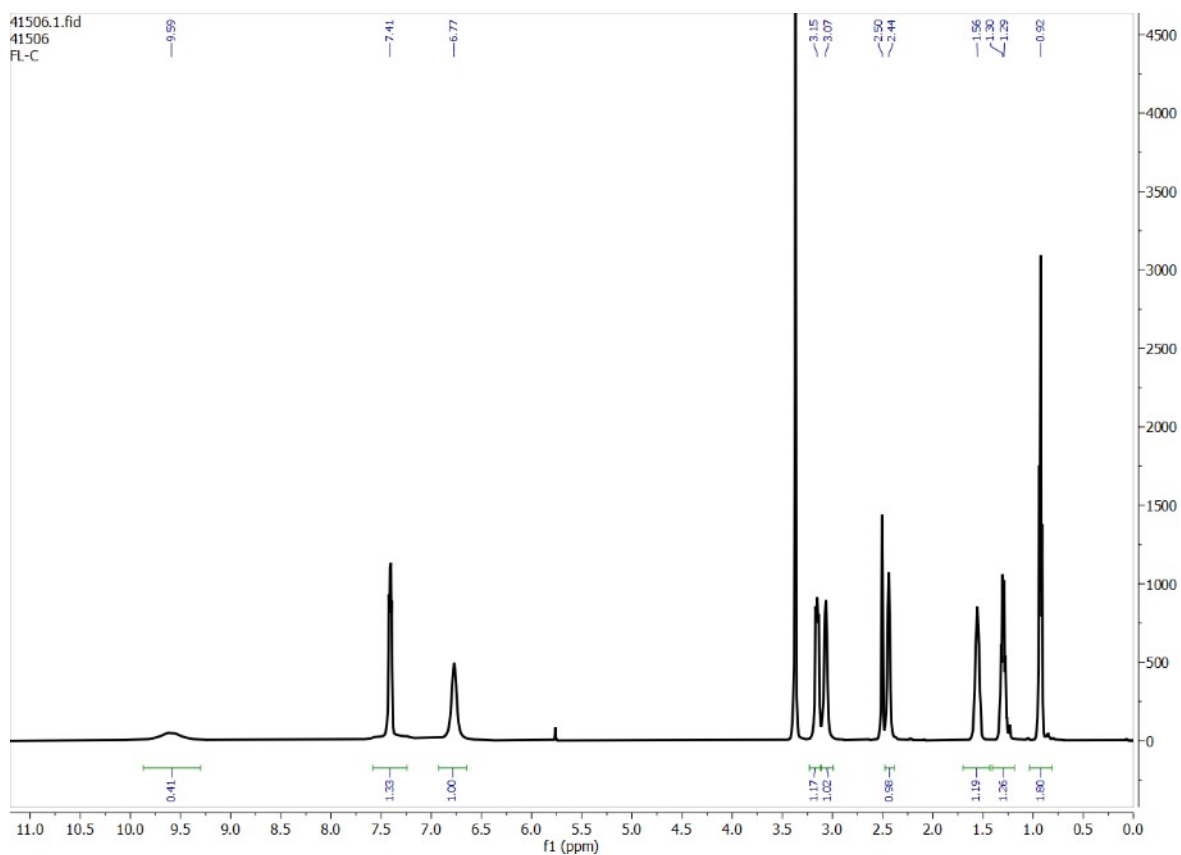

**Fig. S28.**  $^1\text{H-NMR}$  spectrum of carbonate complex,  $[(n\text{-Bu}_4\text{N})_2(2\text{L}_3\cdot\text{CO}_3)]$  in  $\text{DMSO-D}_6$ .

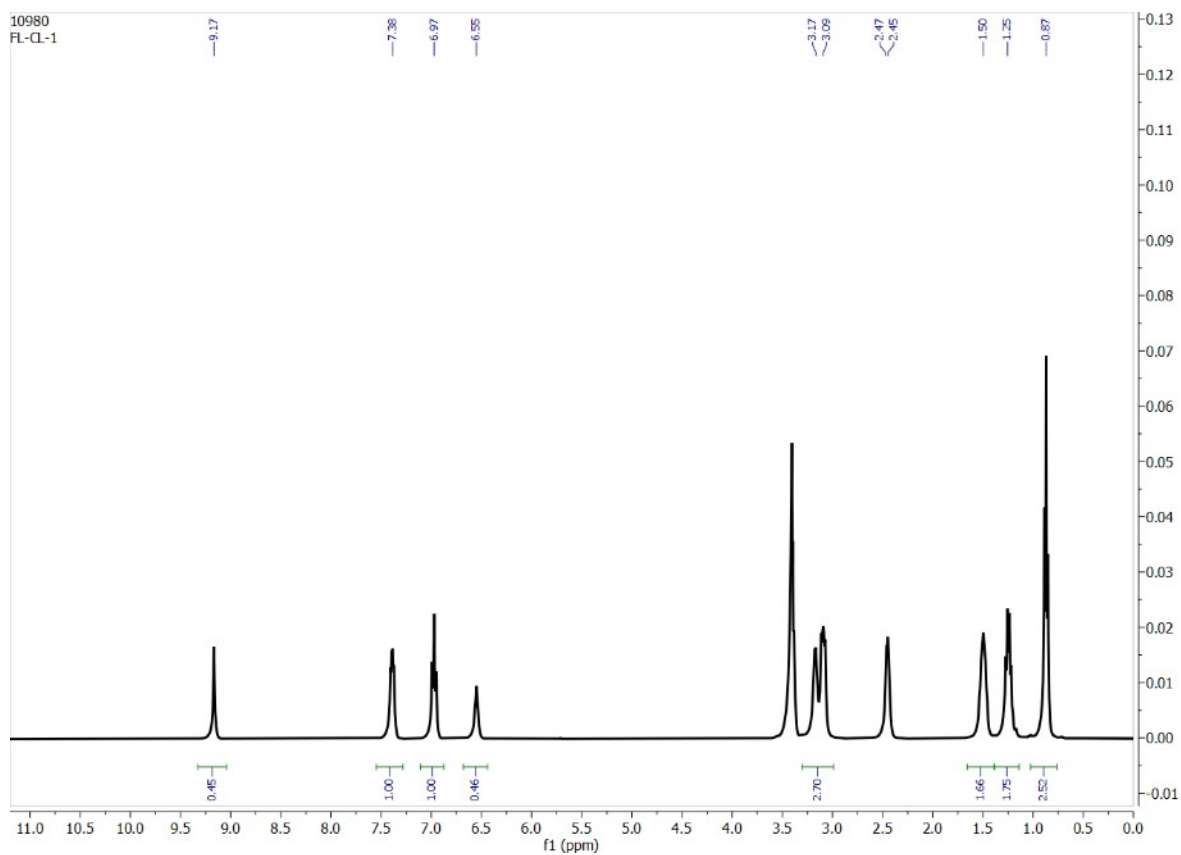

**Fig. S29.**  $^1\text{H-NMR}$  spectrum of chloride complex,  $[(n\text{-Bu}_4\text{N})(\text{L}_3\cdot\text{Cl})]$  in  $\text{DMSO-D}_6$ .

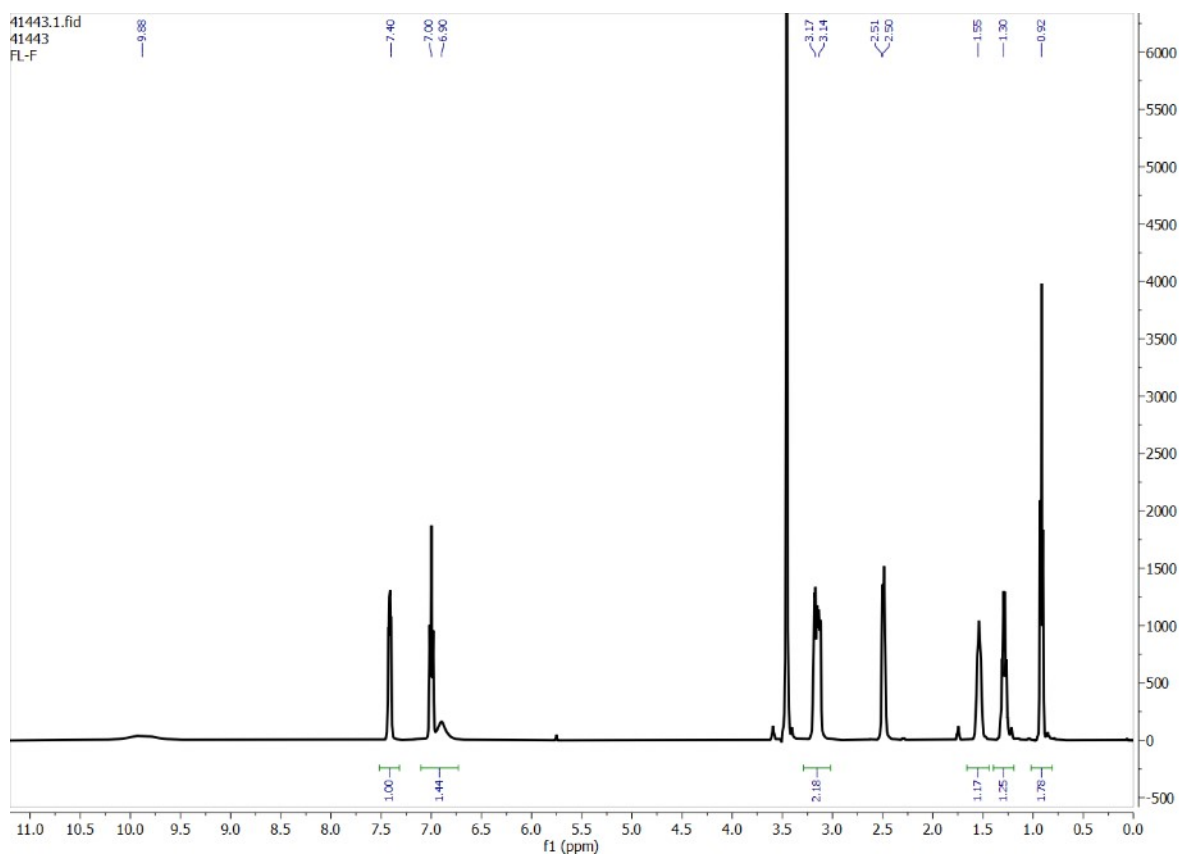

**Fig. S30.**  $^1\text{H-NMR}$  spectrum of fluoride complex,  $[(n\text{-Bu}_4\text{N})(\text{L}_3\cdot\text{F})]$  in  $\text{DMSO-D}_6$ .

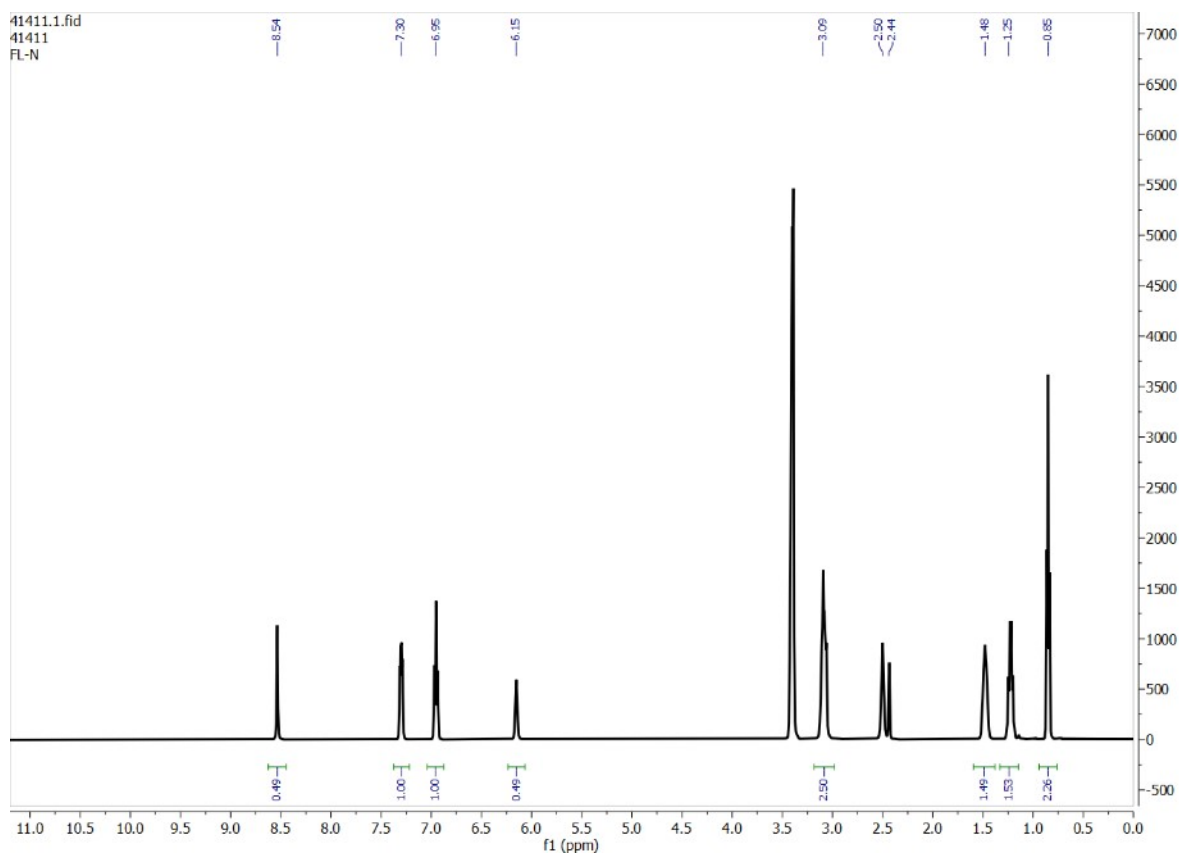

**Fig. S31.**  $^1\text{H-NMR}$  spectrum of nitrate complex,  $[(n\text{-Bu}_4\text{N})(\text{L}_3\cdot\text{NO}_3)]$  in  $\text{DMSO-D}_6$ .

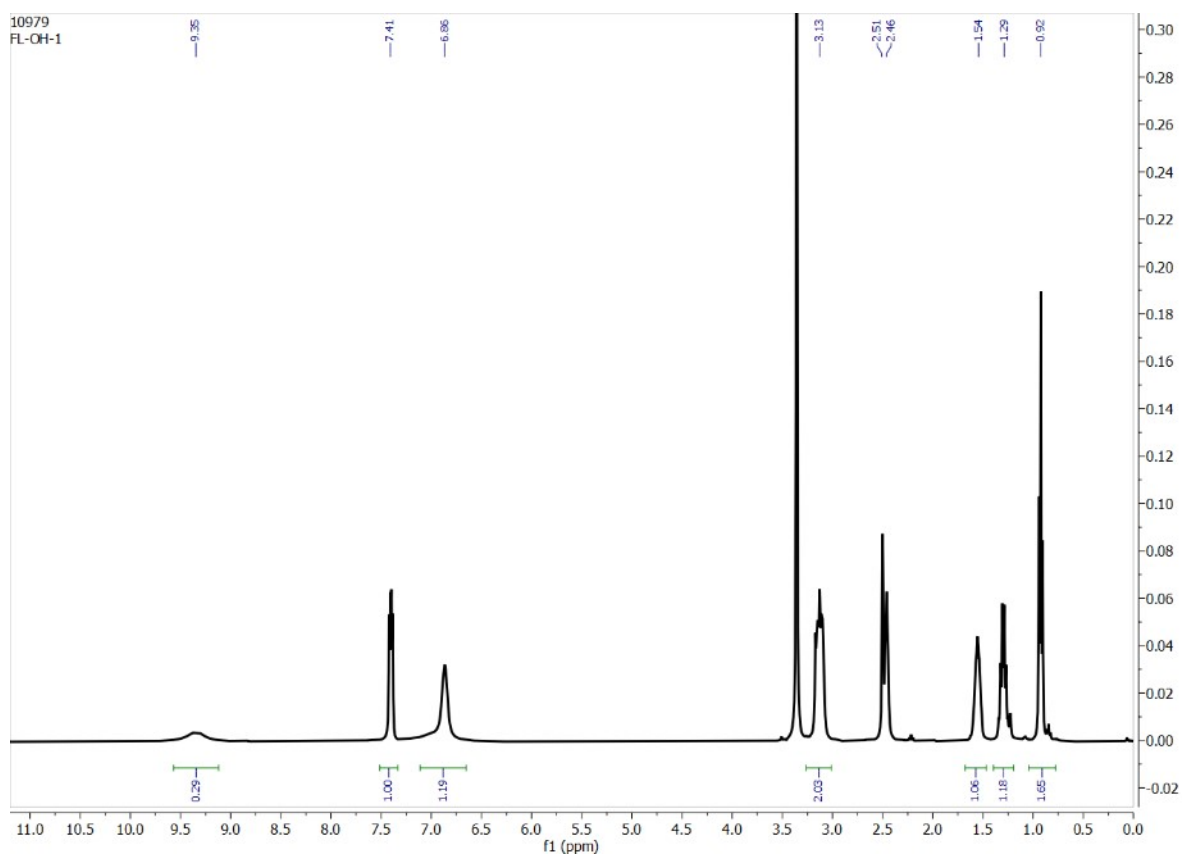

**Fig. S32.**  $^1\text{H-NMR}$  spectrum of hydroxide complex,  $[(n\text{-Bu}_4\text{N})(\text{L}_3\cdot\text{OH})]$  in  $\text{DMSO-D}_6$ .

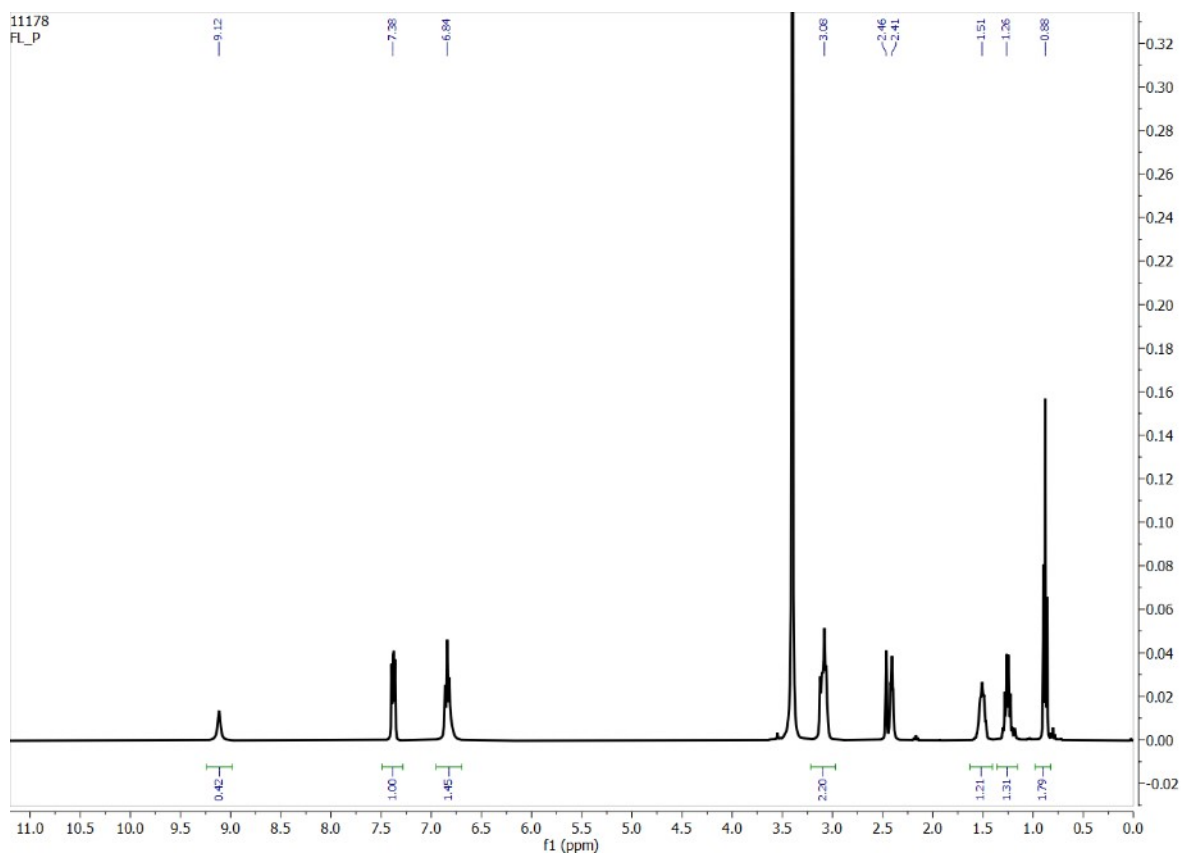

**Fig. S33.**  $^1\text{H-NMR}$  spectrum of hydrogenphosphate complex,  $[(n\text{-Bu}_4\text{N})_2(2\text{L}_3\cdot\text{HPO}_4)]$  in  $\text{DMSO-D}_6$ .

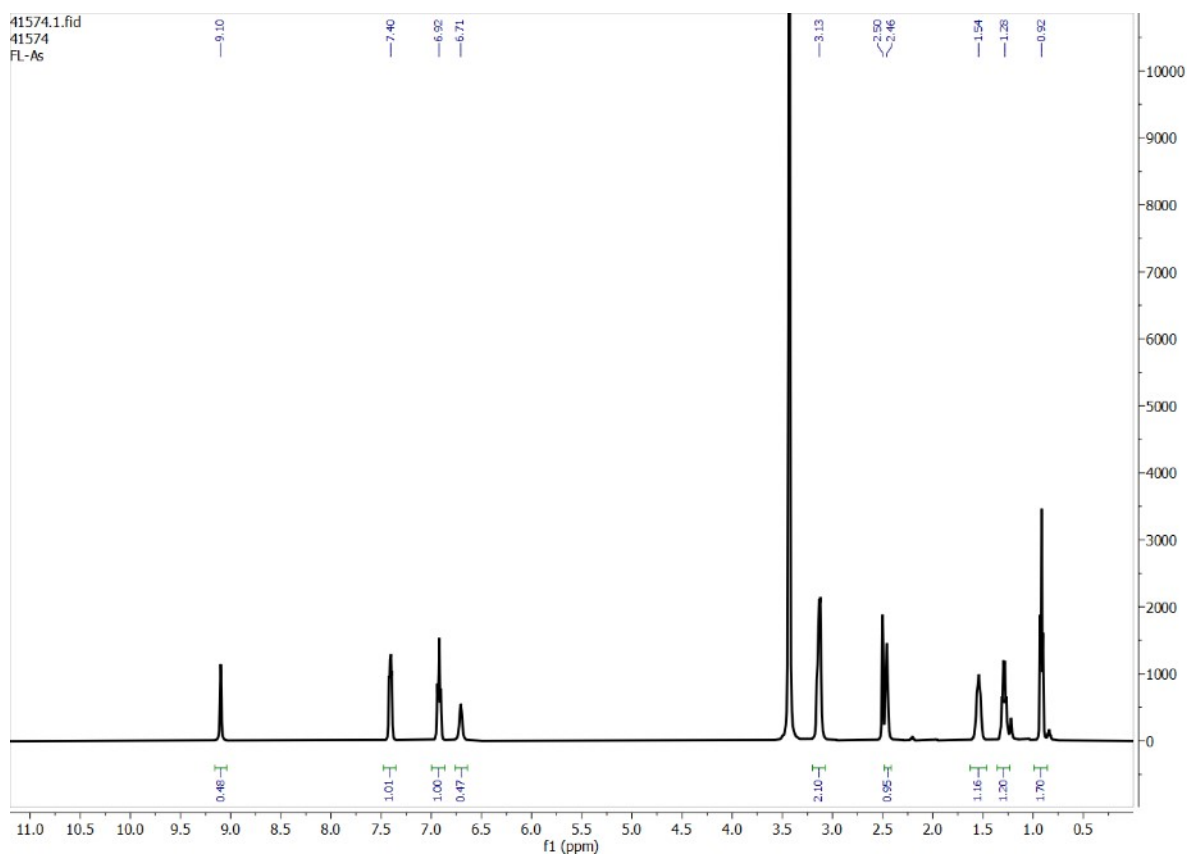

**Fig. S34.**  $^1\text{H-NMR}$  spectrum of hydrogenarsenate complex,  $[(n\text{-Bu}_4\text{N})_2(2\text{L}_3\cdot\text{HAsO}_4)]$  in  $\text{DMSO-D}_6$ .

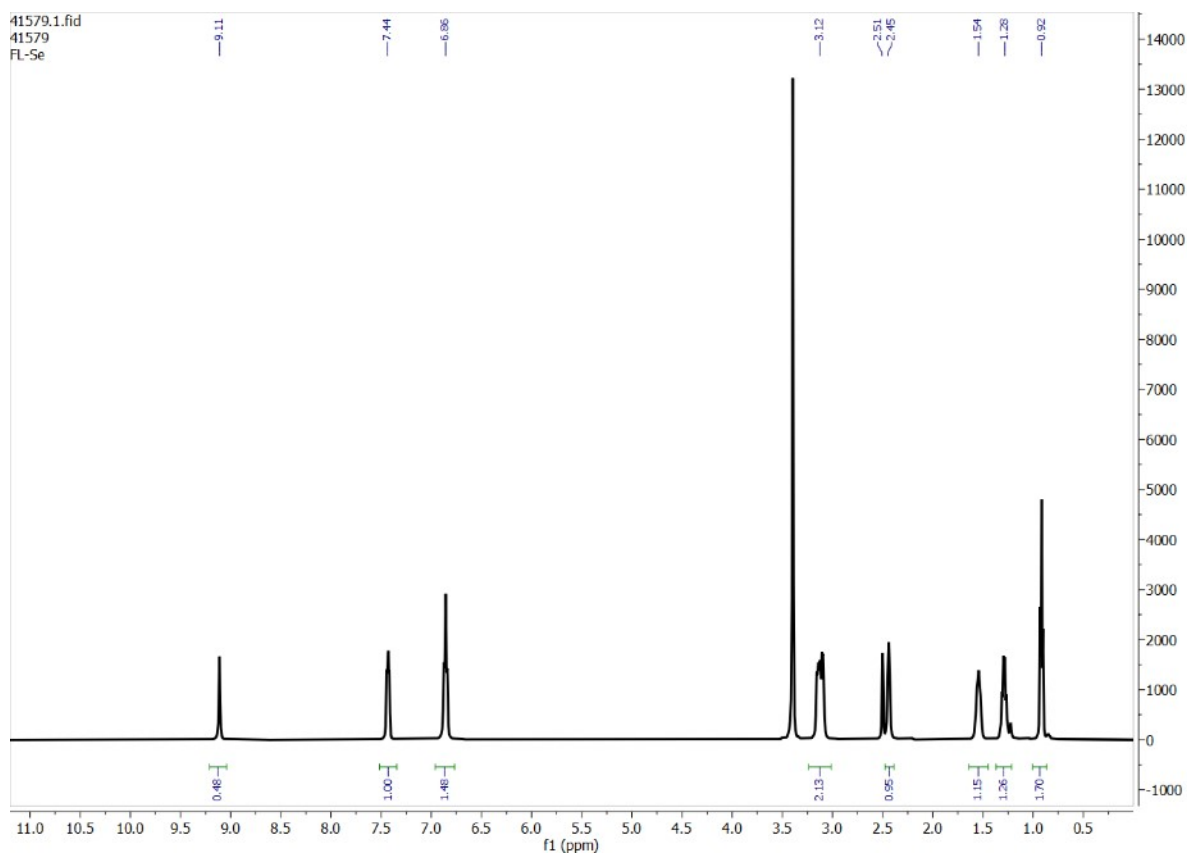

**Fig. S35.**  $^1\text{H-NMR}$  spectrum of selenate complex,  $[(n\text{-Bu}_4\text{N})_2(2\text{L}_3\cdot\text{SeO}_4)]$  in  $\text{DMSO-D}_6$ .

## 9. Selective extraction of sulfate by L<sub>1</sub>: <sup>1</sup>H-NMR spectra of LLE isolated sulfate complexes

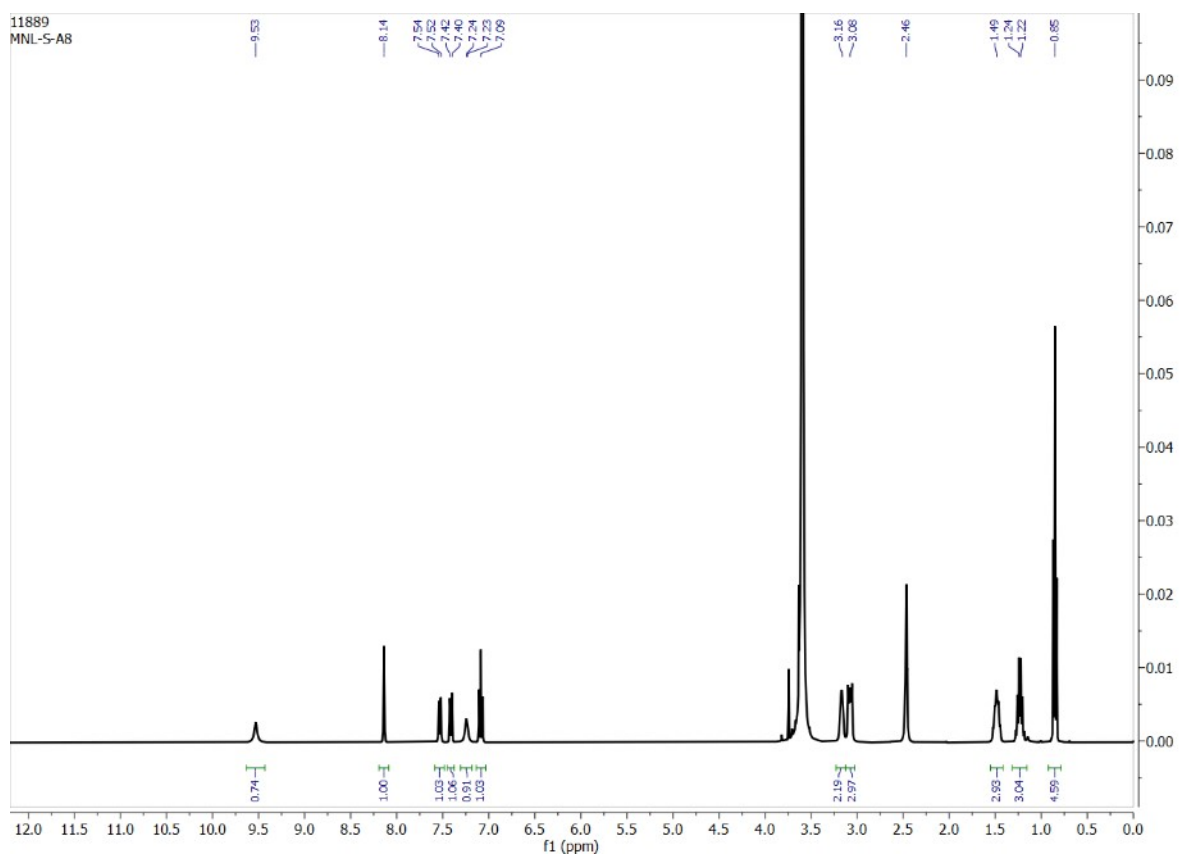

**Fig. S36.** <sup>1</sup>H-NMR spectrum of [(n-Bu<sub>4</sub>N)<sub>2</sub>(2L<sub>1</sub>·SO<sub>4</sub>)] obtained from LLE in the presence of acetate as a competing anion.

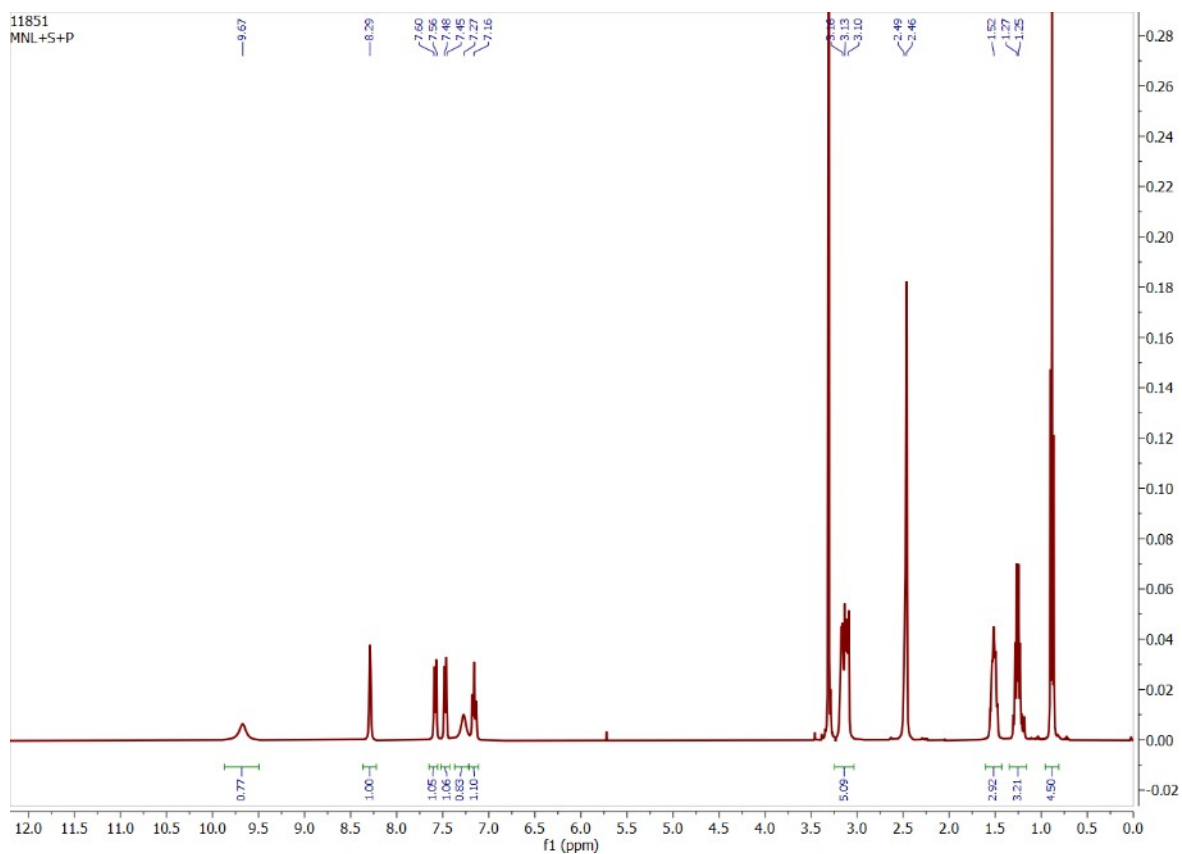

**Fig. S37.**  $^1\text{H-NMR}$  spectrum of  $[(n\text{-Bu}_4\text{N})_2(2\text{L}_1\cdot\text{SO}_4)]$  obtained from LLE in the presence of  $\text{HPO}_4^{2-}$  as a competing anion.

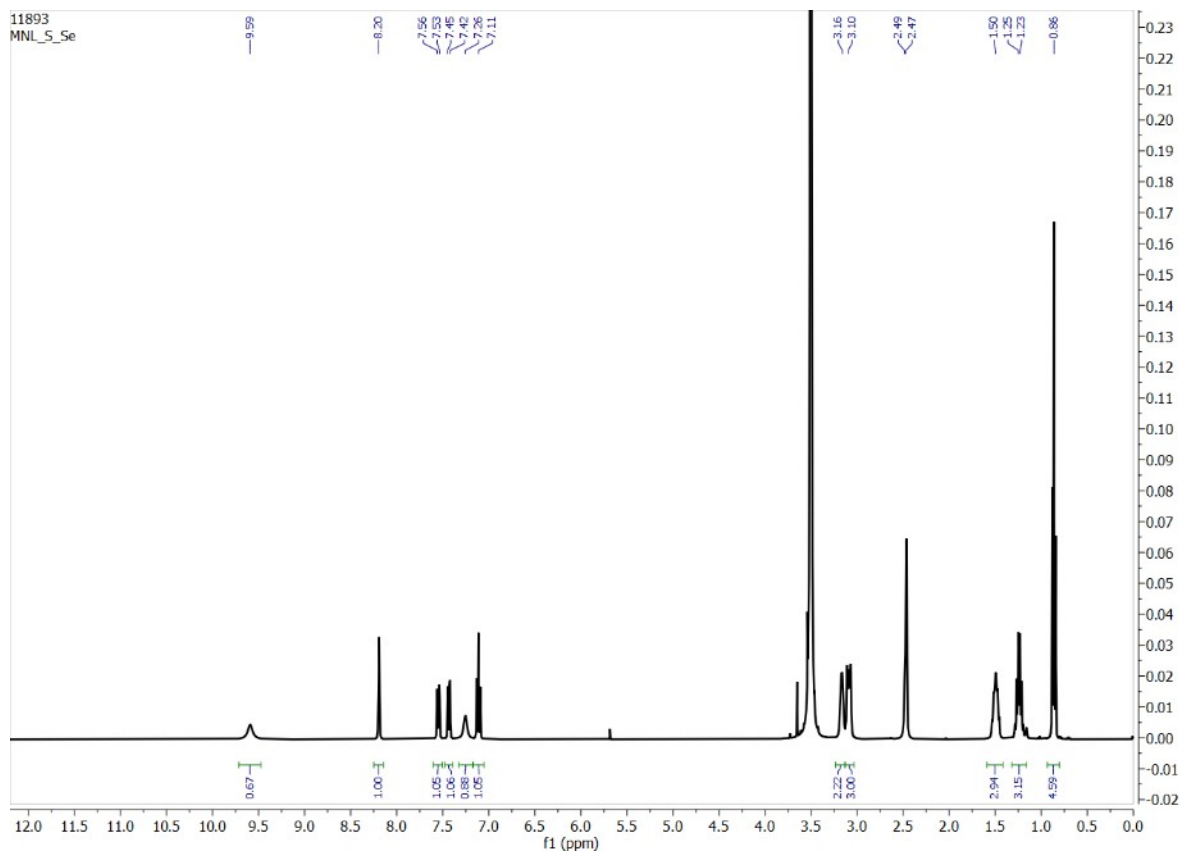

**Fig. S38.**  $^1\text{H-NMR}$  spectrum of  $[(n\text{-Bu}_4\text{N})_2(2\text{L}_1\cdot\text{SO}_4)]$  obtained from LLE in the presence of selenate as a competing anion.

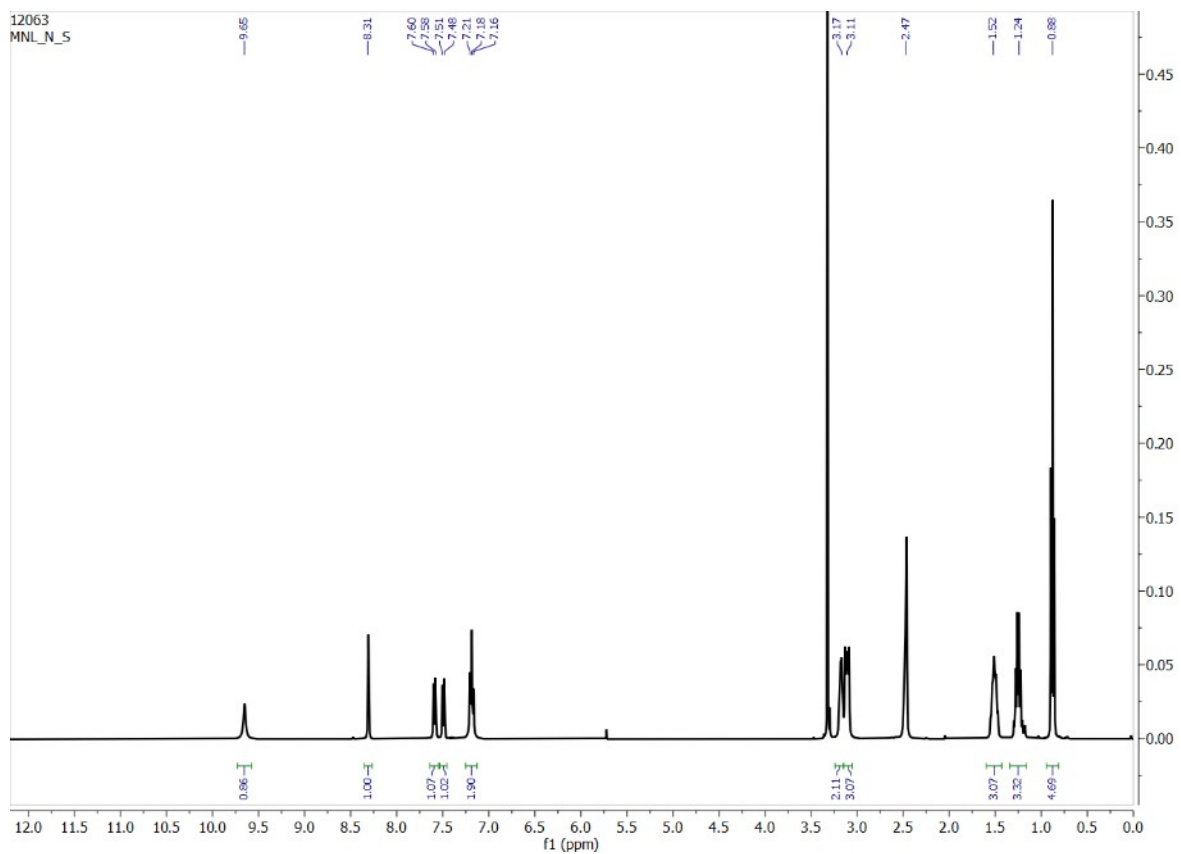



**Fig. S39.**  $^1\text{H-NMR}$  spectrum of  $[(n\text{-Bu}_4\text{N})_2(2\text{L}_1\cdot\text{SO}_4)]$  obtained from LLE in the presence of nitrate as a competing anion.

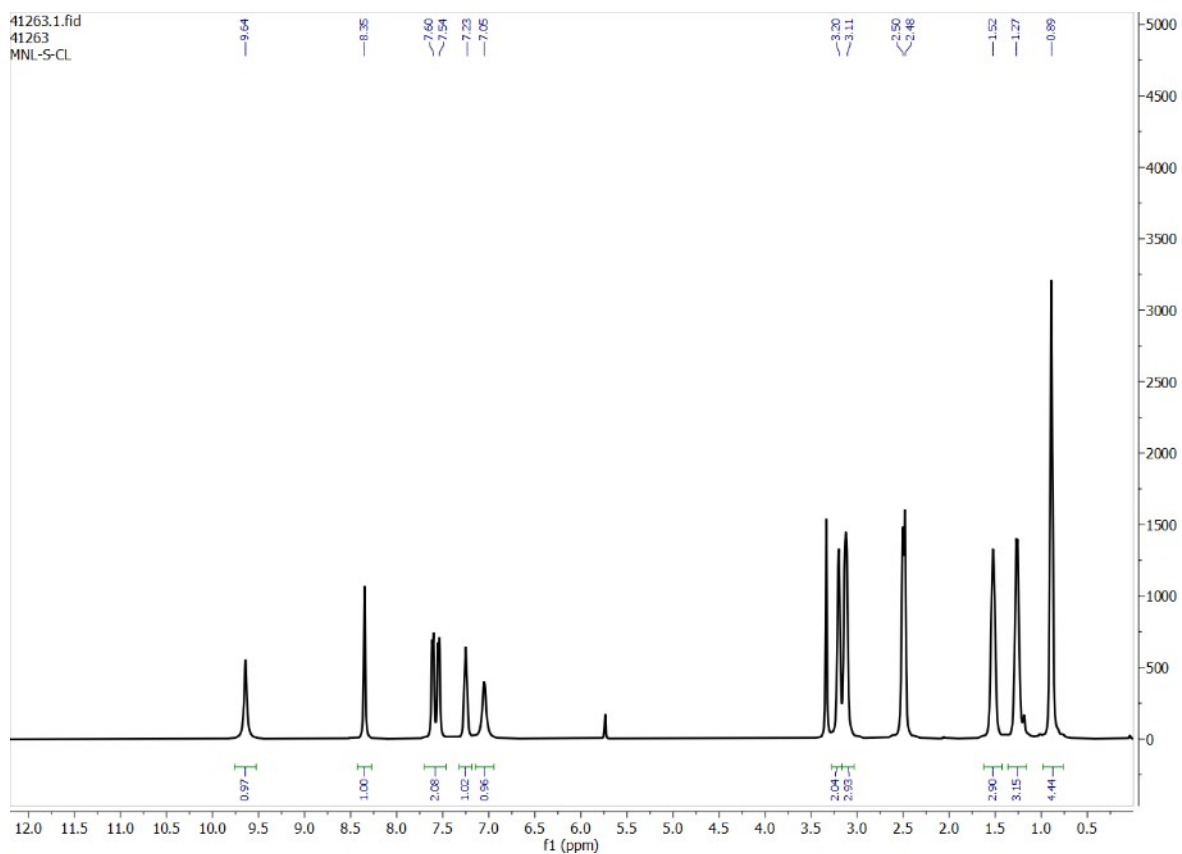

**Fig. S40.**  $^1\text{H-NMR}$  spectrum of  $[(n\text{-Bu}_4\text{N})_2(2\text{L}_1\cdot\text{SO}_4)]$  obtained from LLE in the presence of chloride as a competing anion.

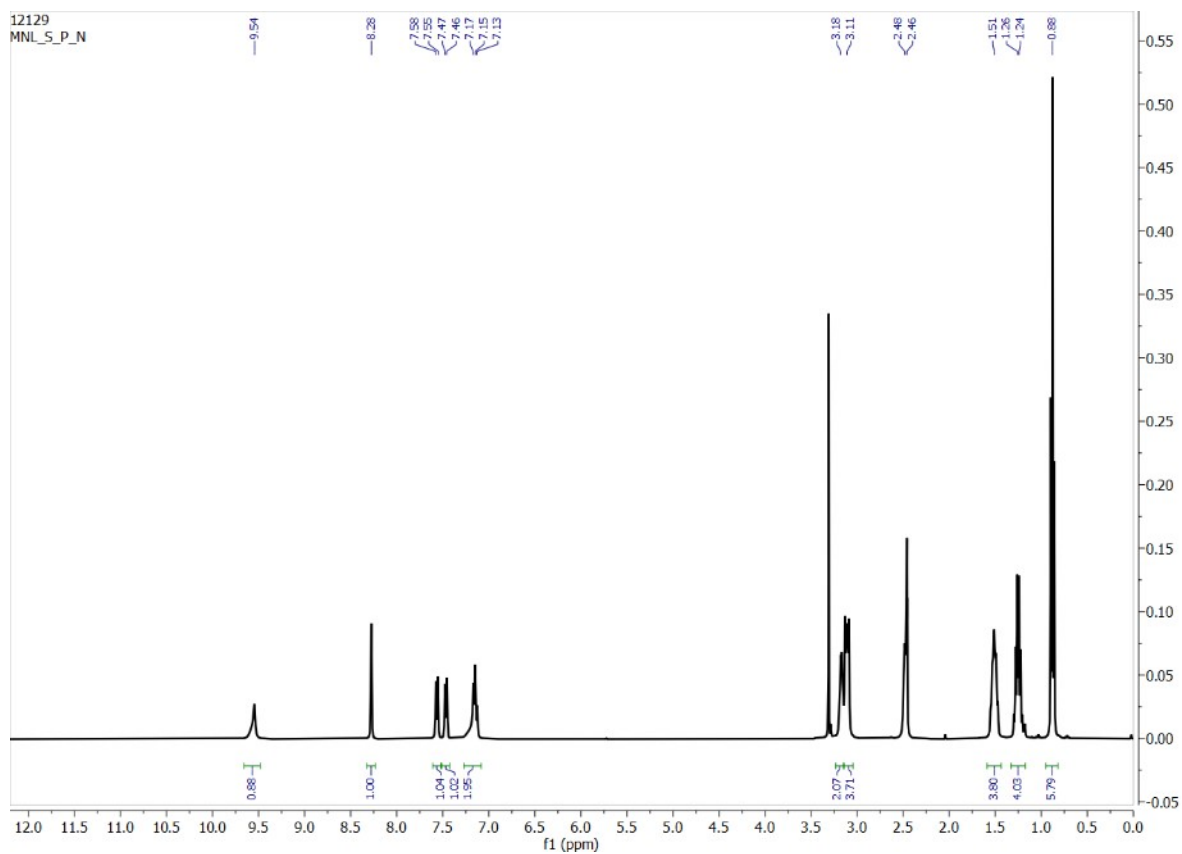

**Fig. S41.**  $^1\text{H-NMR}$  spectrum of  $[(n\text{-Bu}_4\text{N})_2(2\text{L}_1\cdot\text{SO}_4)]$  obtained from LLE in the presence of hydrogenphosphate and nitrate as competing anions.

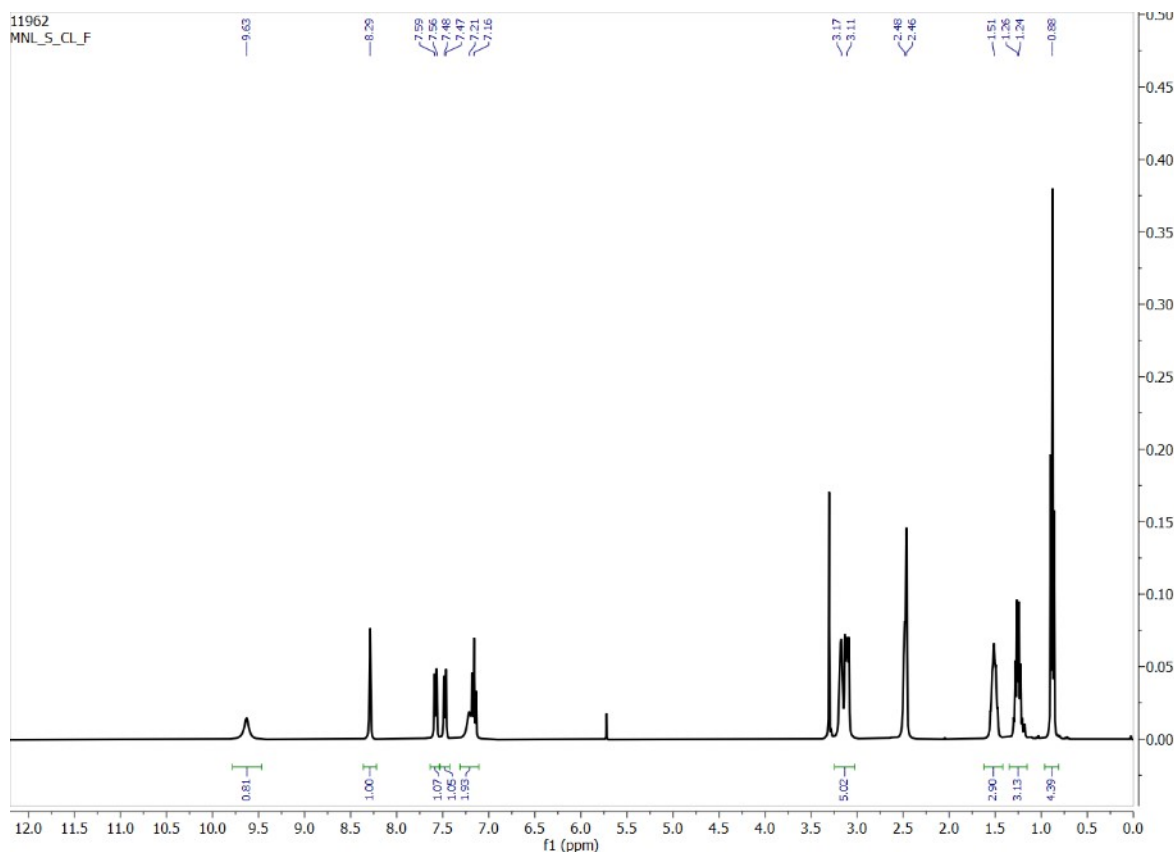

**Fig. S42.**  $^1\text{H-NMR}$  spectrum of  $[(n\text{-Bu}_4\text{N})_2(2\text{L}_1\cdot\text{SO}_4)]$  obtained from LLE in the presence of chloride and fluoride as competing anions (no signal for fluoride was observed in  $^{19}\text{F-NMR}$  spectrum).

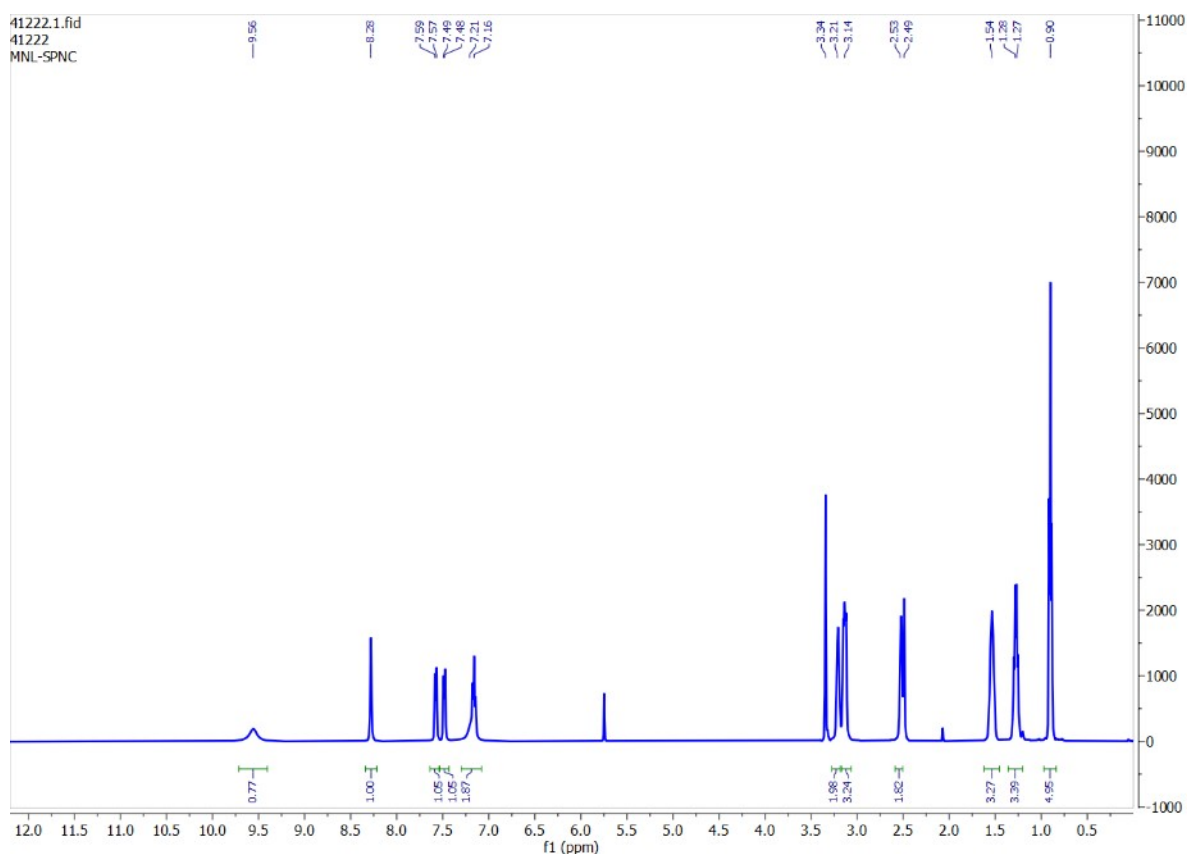

**Fig. S43.**  $^1\text{H-NMR}$  spectrum of  $[(n\text{-Bu}_4\text{N})_2(2\text{L}_1\cdot\text{SO}_4)]$  obtained from LLE in the presence of hydrogenphosphate, carbonate and nitrate as competing anions (no signal for phosphate was observed in  $^{31}\text{P-NMR}$  spectrum).

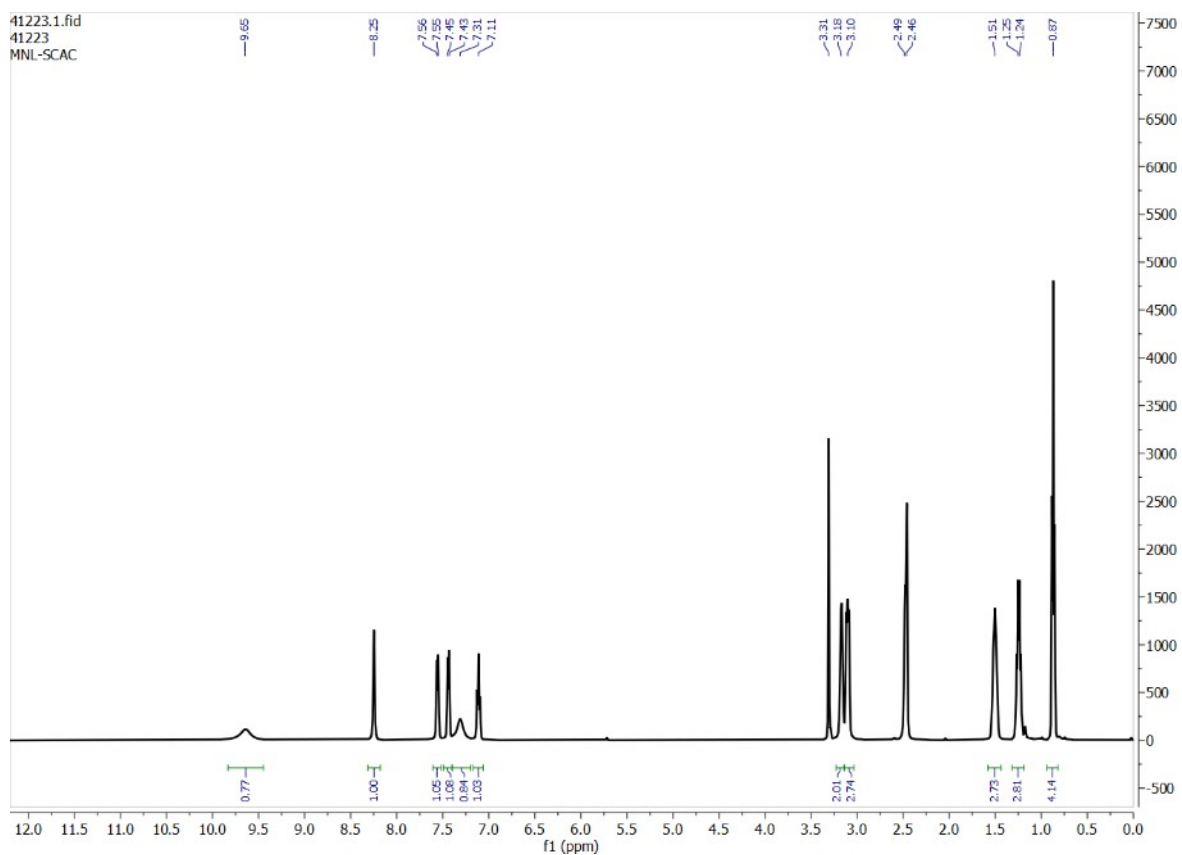

**Fig. S44.**  $^1\text{H-NMR}$  spectrum of  $[(n\text{-Bu}_4\text{N})_2(2\text{L}_1\cdot\text{SO}_4)]$  obtained from LLE in the presence of acetate and carbonate as competing anions (no acetate  $-\text{CH}_3$  peak observed at  $\approx 1.9$  ppm).

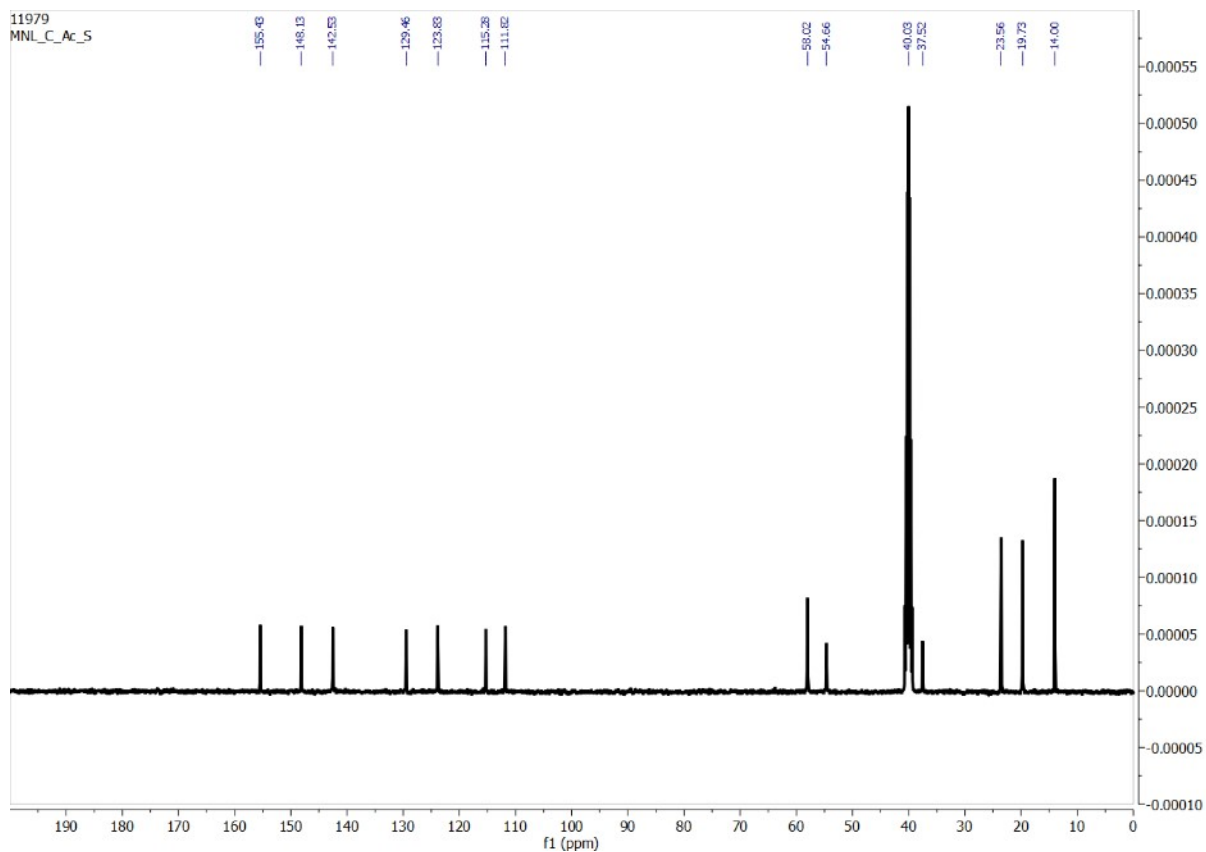

**Fig. S45.**  $^1\text{H-NMR}$  spectrum of  $[(n\text{-Bu}_4\text{N})_2(2\text{L}_1\cdot\text{SO}_4)]$  obtained from LLE in the presence of acetate and carbonate as competing anions (no signals for acetate and carbonate observed in the spectrum).

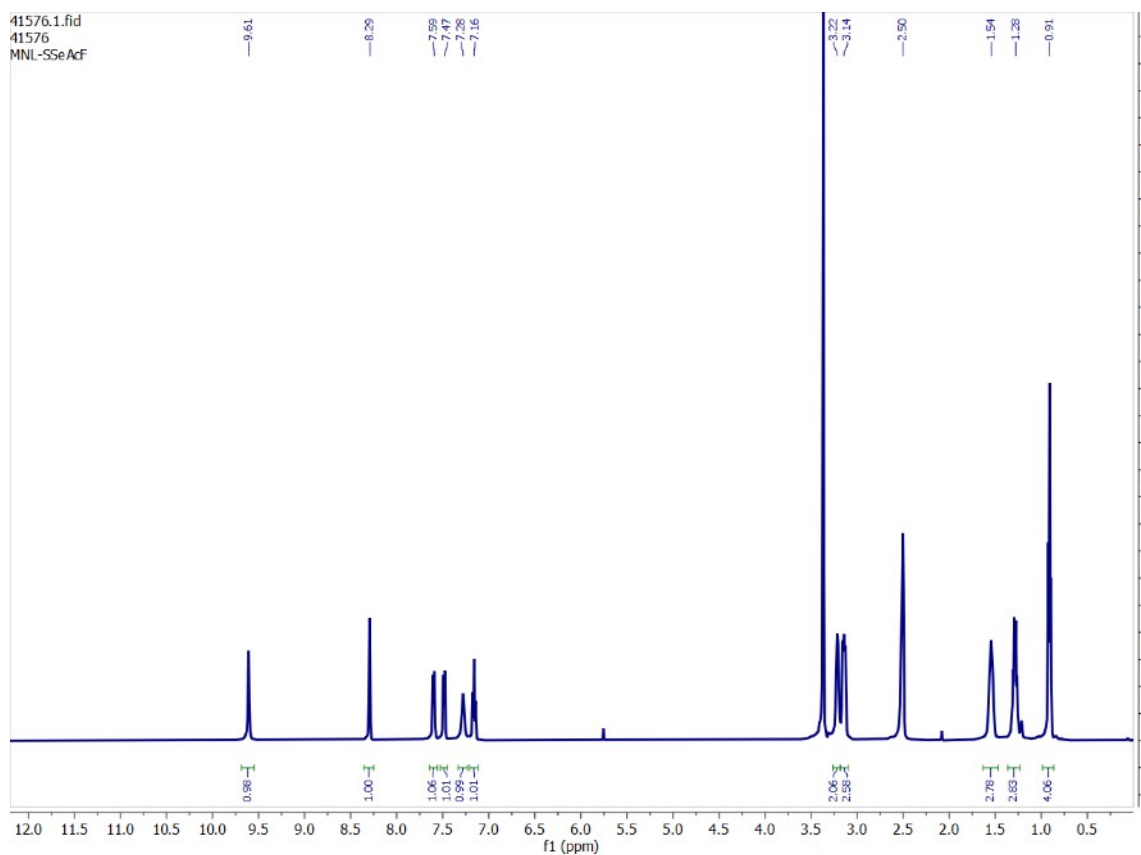

**Fig. S46.**  $^1\text{H-NMR}$  spectrum of  $[(n\text{-Bu}_4\text{N})_2(2\text{L}_1\cdot\text{SO}_4)]$  obtained from LLE in the presence of selenate, acetate and fluoride as competing anions (no signal for fluoride was observed in  $^{19}\text{F-NMR}$  spectrum).

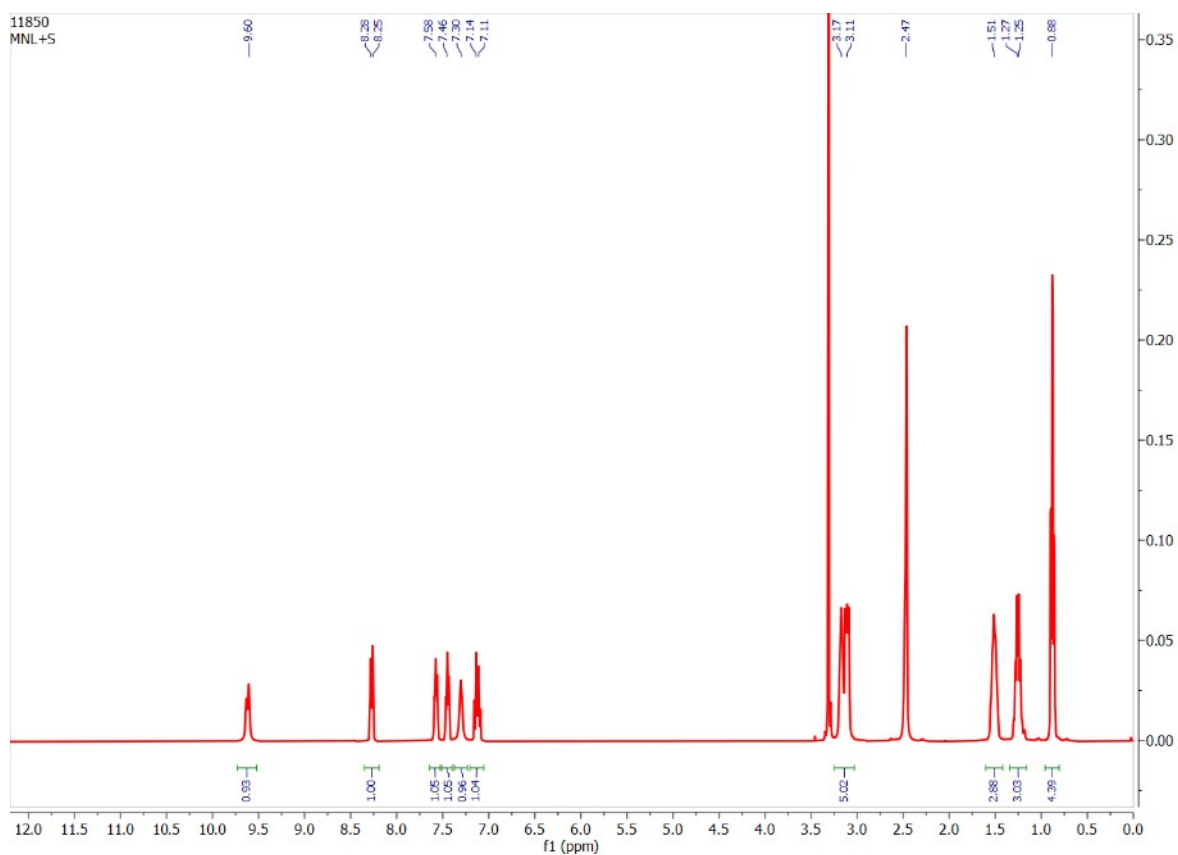

**Fig. S47.** <sup>1</sup>H-NMR spectrum of [(n-Bu<sub>4</sub>N)<sub>2</sub>(2L<sub>1</sub>·SO<sub>4</sub>)] obtained in the presence of two equivalents of tetrabutylammonium hydrogensulfate in organic phase and one equivalent of sodium sulfate in the aqueous phase.

### 10. Selective extraction of sulfate by L<sub>2</sub>: <sup>1</sup>H-NMR spectra of LLE isolated sulfate complexes

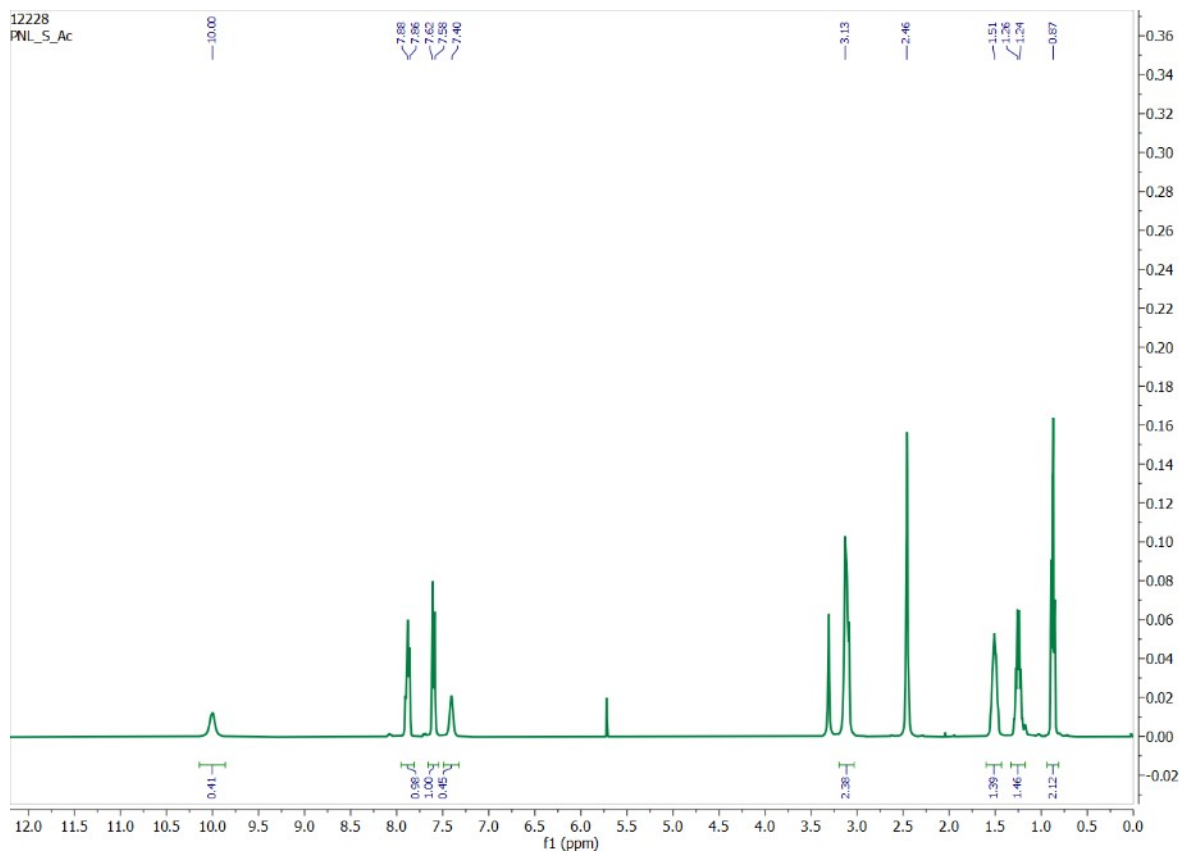

**Fig. S48.**  $^1\text{H-NMR}$  spectrum of  $[(n\text{-Bu}_4\text{N})_2(2\text{L}_2\cdot\text{SO}_4)]$  obtained from LLE in the presence of acetate as a competing anion.

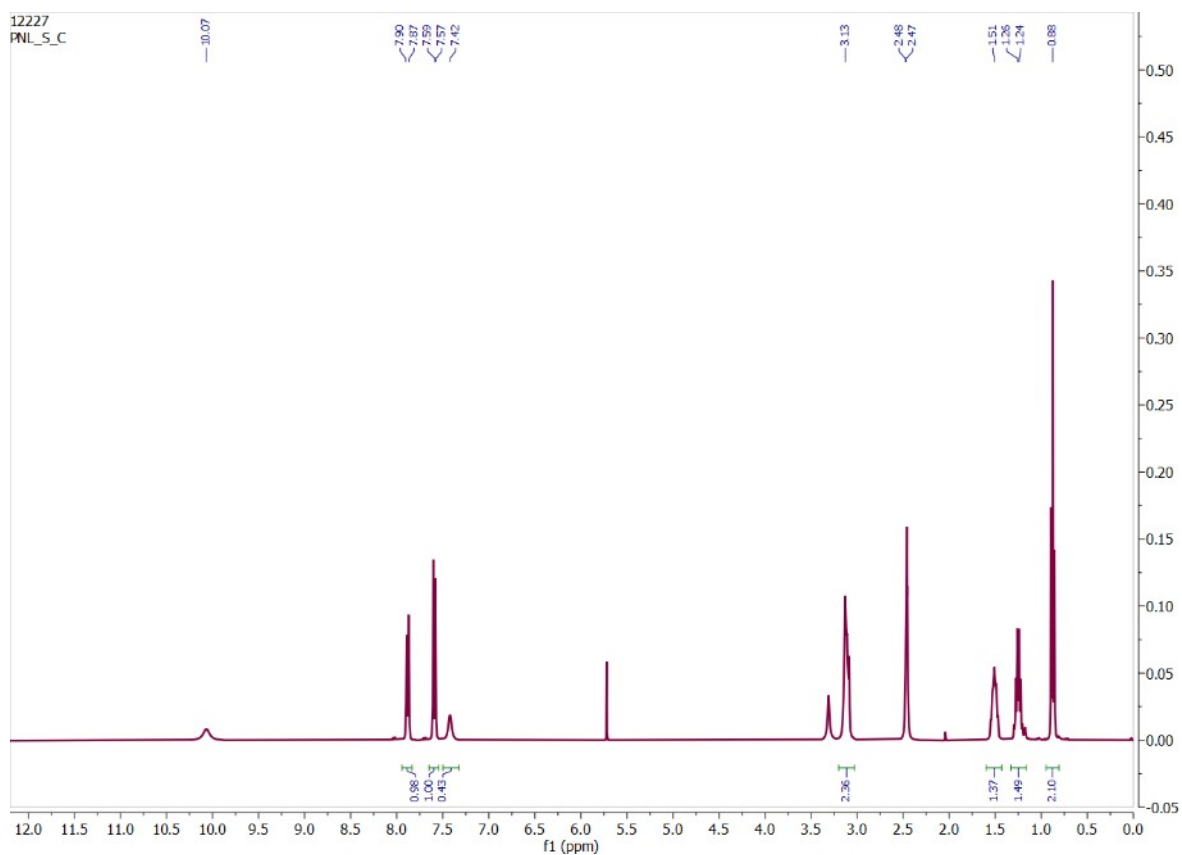

**Fig. S49.**  $^1\text{H-NMR}$  spectrum of  $[(n\text{-Bu}_4\text{N})_2(2\text{L}_2\cdot\text{SO}_4)]$  obtained from LLE in the presence of carbonate as a competing anion.

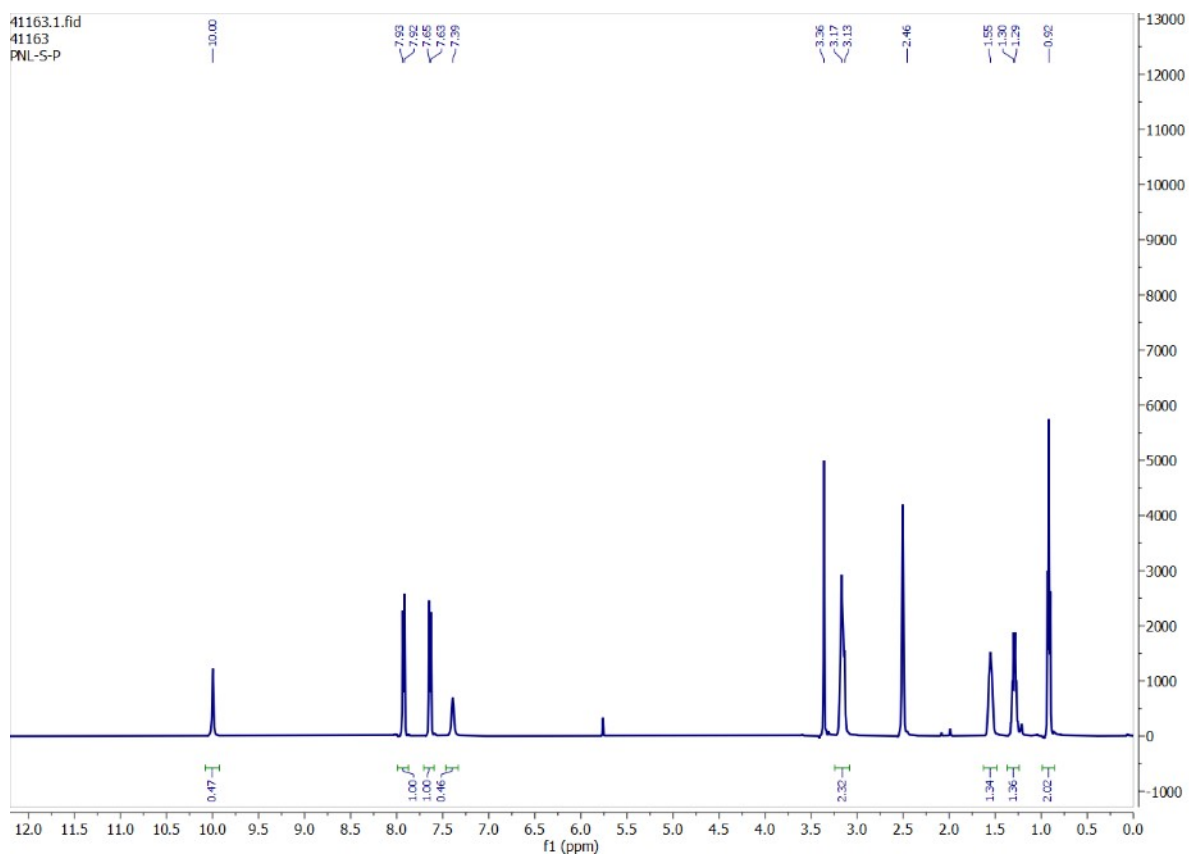

**Fig. S50.**  $^1\text{H-NMR}$  spectrum of  $[(\text{n-Bu}_4\text{N})_2(2\text{L}_2\cdot\text{SO}_4)]$  obtained from LLE in the presence of hydrogenphosphate as a competing anion (no signal for phosphate was observed in  $^{31}\text{P-NMR}$  spectrum).

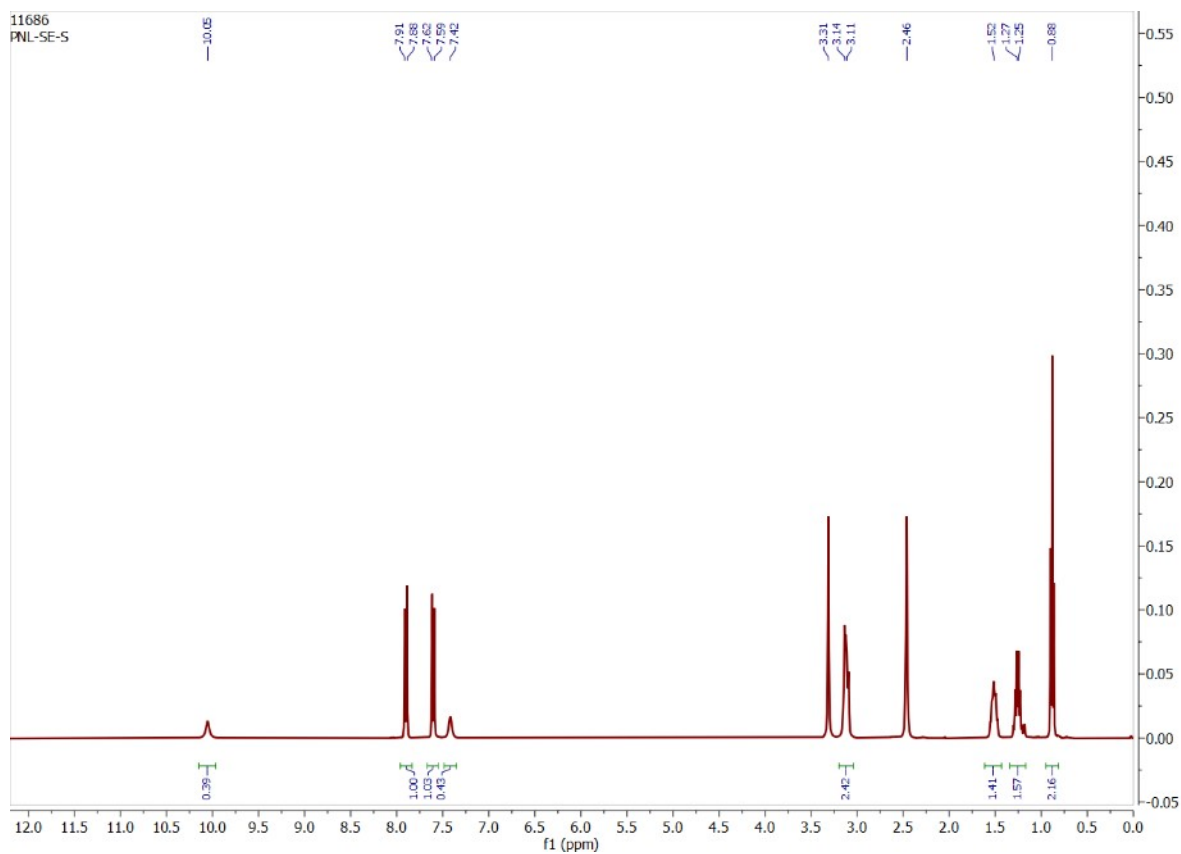

**Fig. S51.**  $^1\text{H-NMR}$  spectrum of  $[(n\text{-Bu}_4\text{N})_2(2\text{L}_2\cdot\text{SO}_4)]$  obtained from LLE in the presence of selenate as a competing anion.

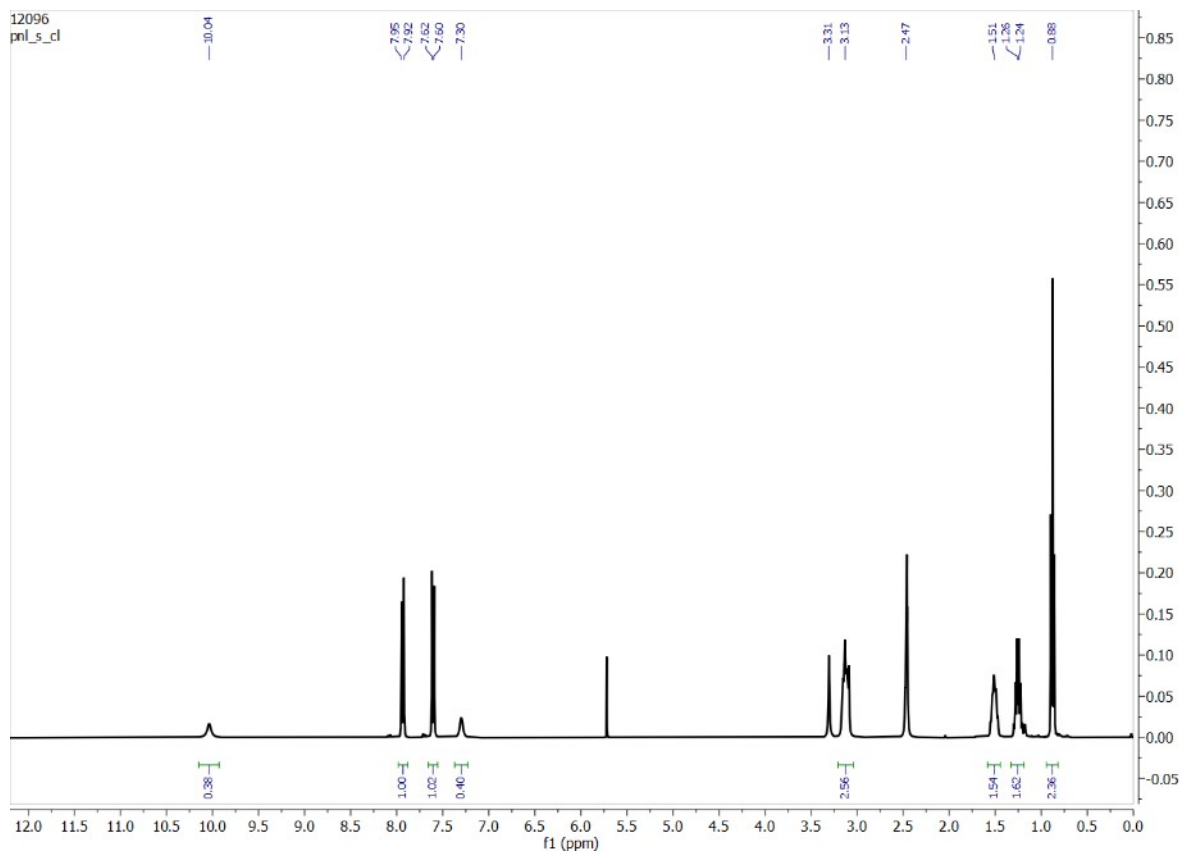

**Fig. S52.**  $^1\text{H-NMR}$  spectrum of  $[(n\text{-Bu}_4\text{N})_2(2\text{L}_2\cdot\text{SO}_4)]$  obtained from LLE in the presence of chloride as a competing anion.

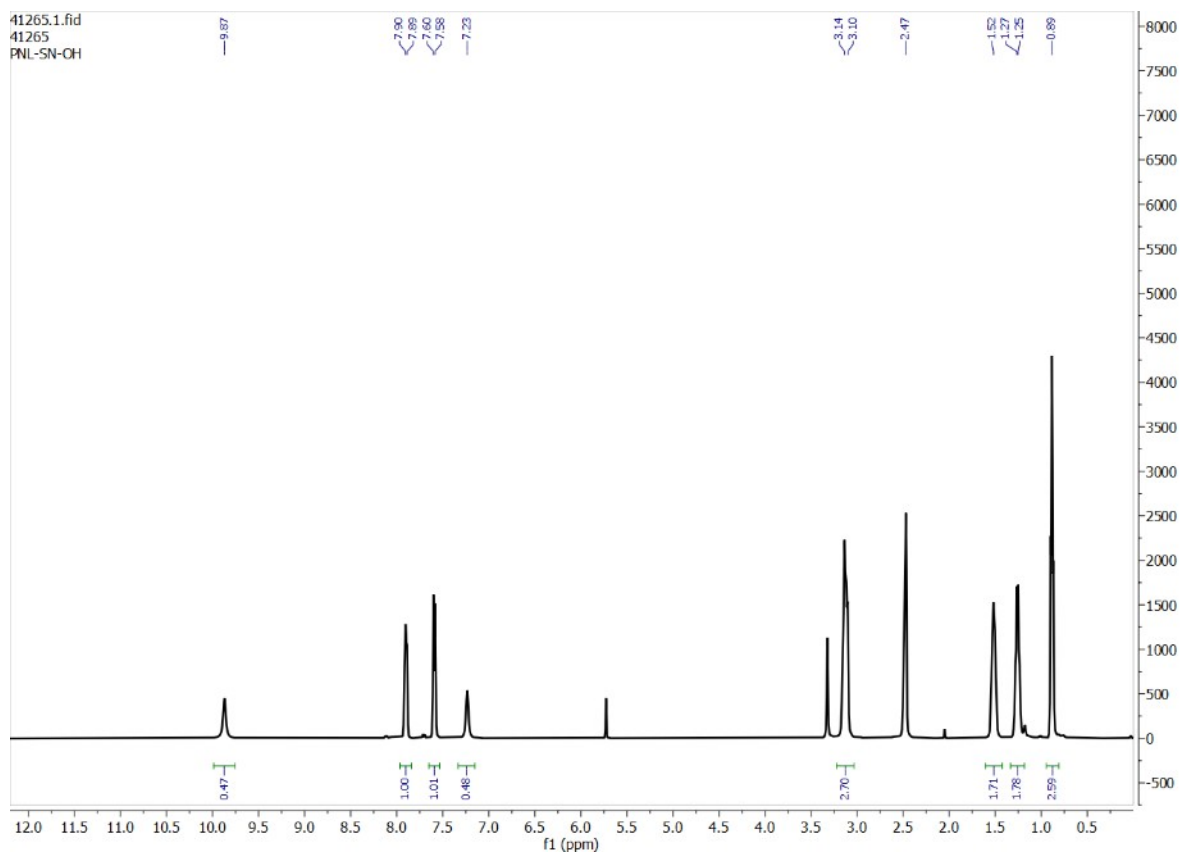



**Fig. S53.**  $^1\text{H-NMR}$  spectrum of  $[(n\text{-Bu}_4\text{N})_2(2\text{L}_2\cdot\text{SO}_4)]$  obtained from LLE in the presence of nitrate as a competing anion.

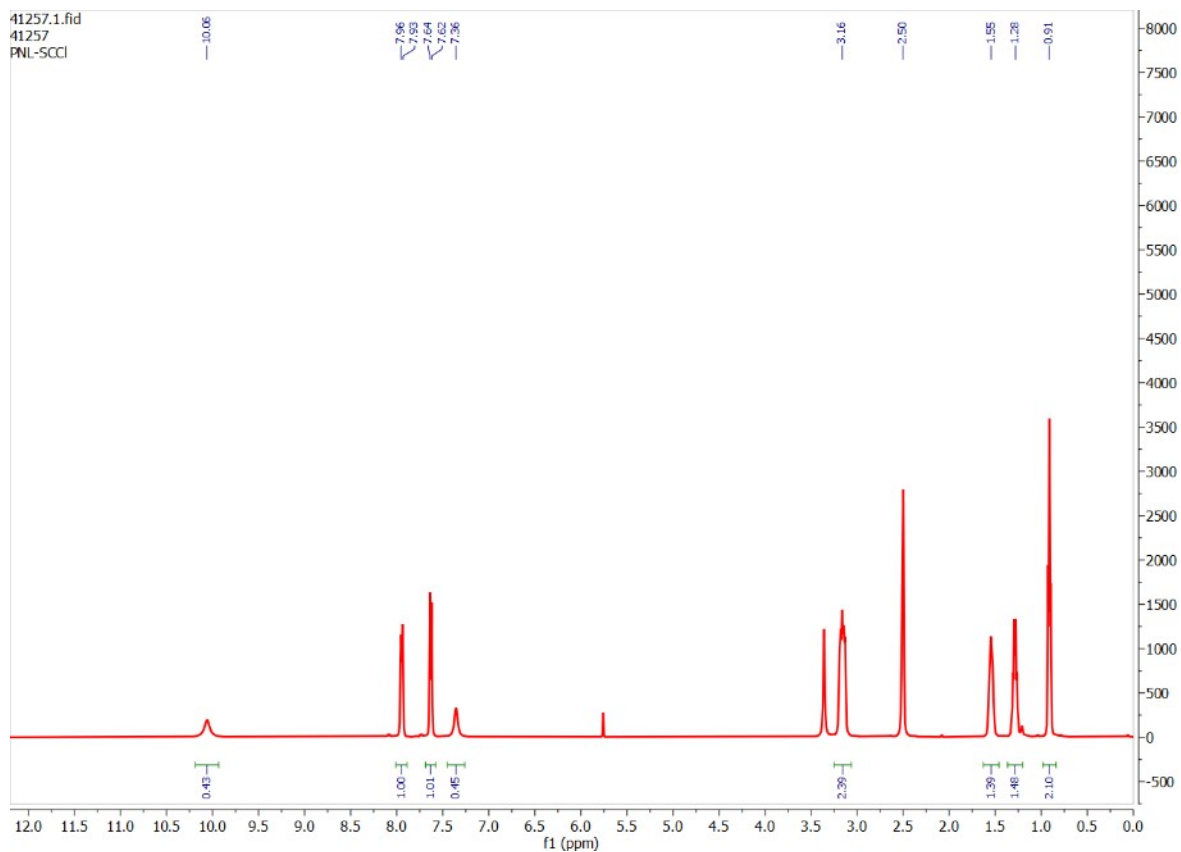

**Fig. S54.**  $^1\text{H-NMR}$  spectrum of  $[(n\text{-Bu}_4\text{N})_2(2\text{L}_2\cdot\text{SO}_4)]$  obtained from LLE in the presence of carbonate and chloride as competing anions.

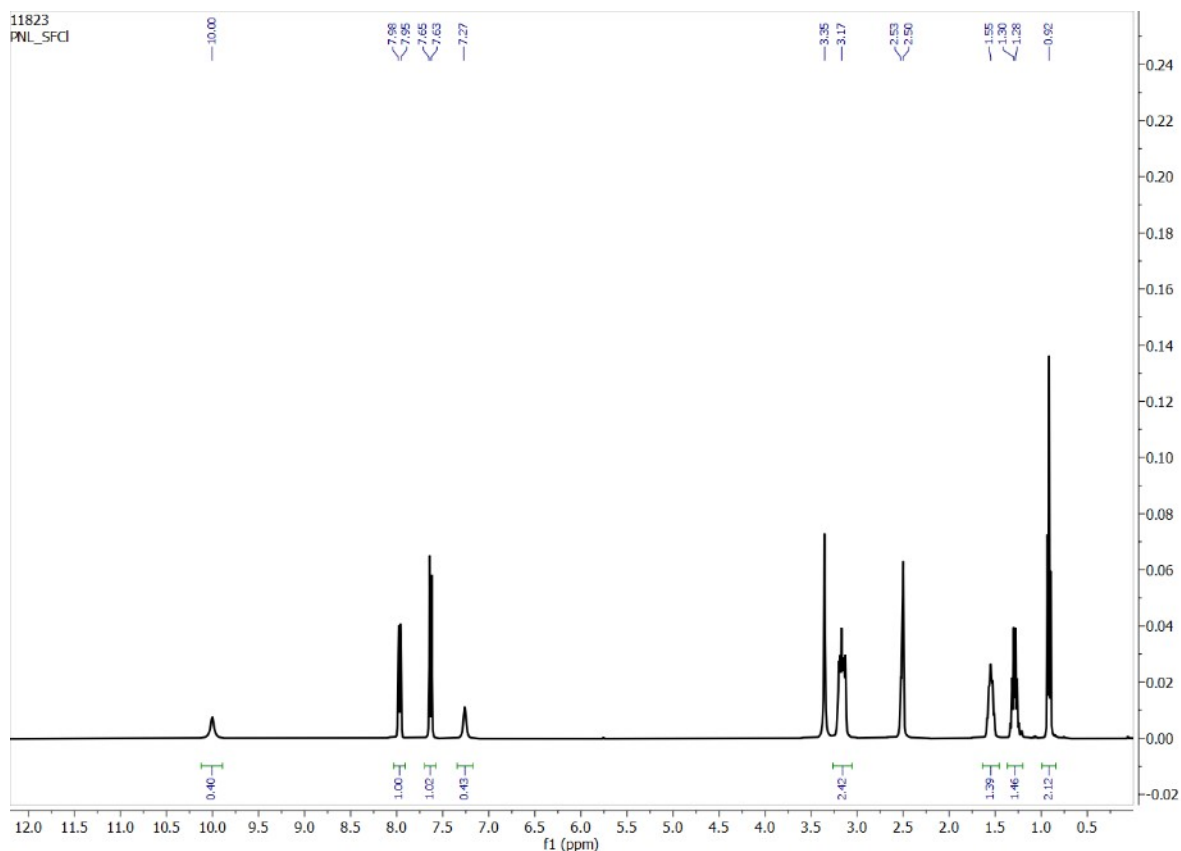

**Fig. S55.**  $^1\text{H-NMR}$  spectrum of  $[(n\text{-Bu}_4\text{N})_2(2\text{L}_2\text{-SO}_4)]$  obtained from LLE in the presence of chloride and fluoride as competing anions (no signal for fluoride was observed in  $^{19}\text{F-NMR}$  spectrum).

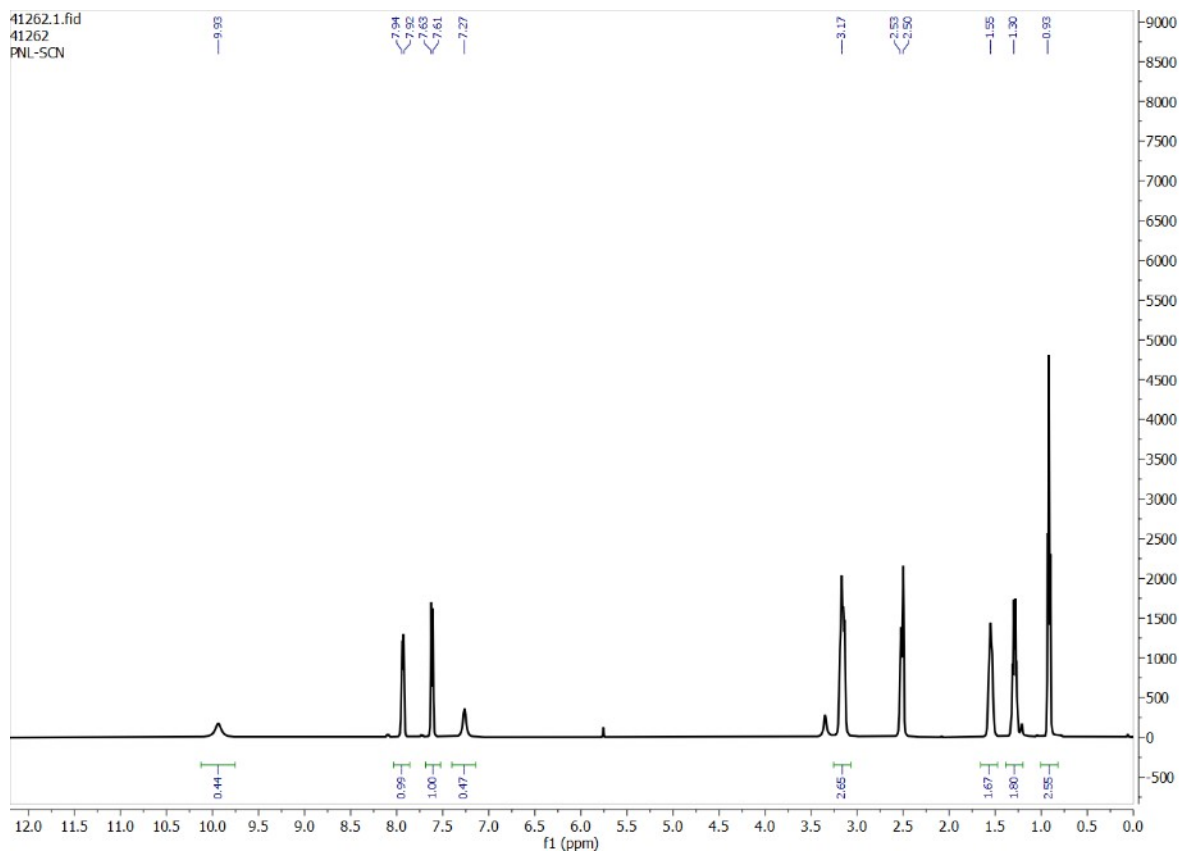

**Fig. S56.**  $^1\text{H-NMR}$  spectrum of  $[(n\text{-Bu}_4\text{N})_2(2\text{L}_2\text{-SO}_4)]$  obtained from LLE in the presence of carbonate and nitrate as competing anions (no signal for carbonate observed in the  $^{13}\text{C-NMR}$  spectrum).

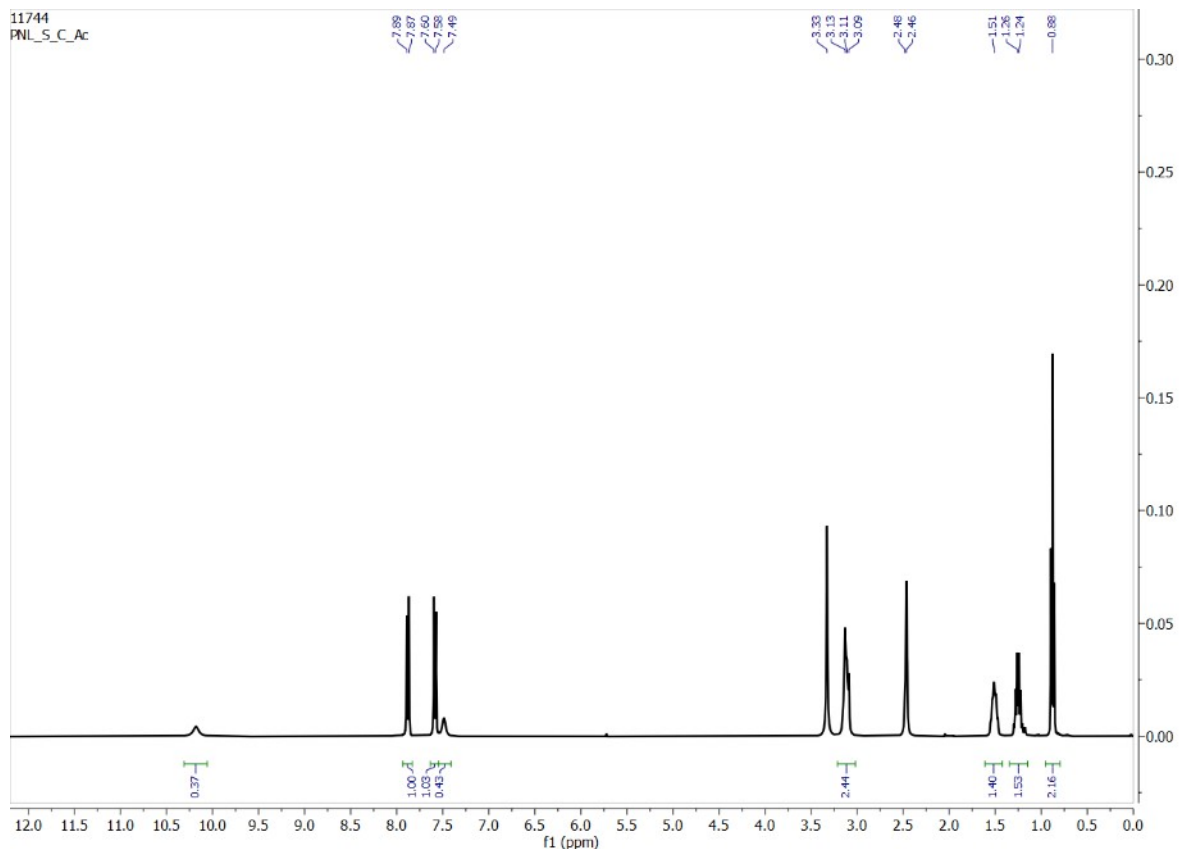

**Fig. S57.**  $^1\text{H-NMR}$  spectrum of  $[(n\text{-Bu}_4\text{N})_2(2\text{L}_2\cdot\text{SO}_4)]$  obtained from LLE in the presence of carbonate and acetate as competing anions (no signals for acetate at  $\approx 1.9$  ppm observed in the spectrum).

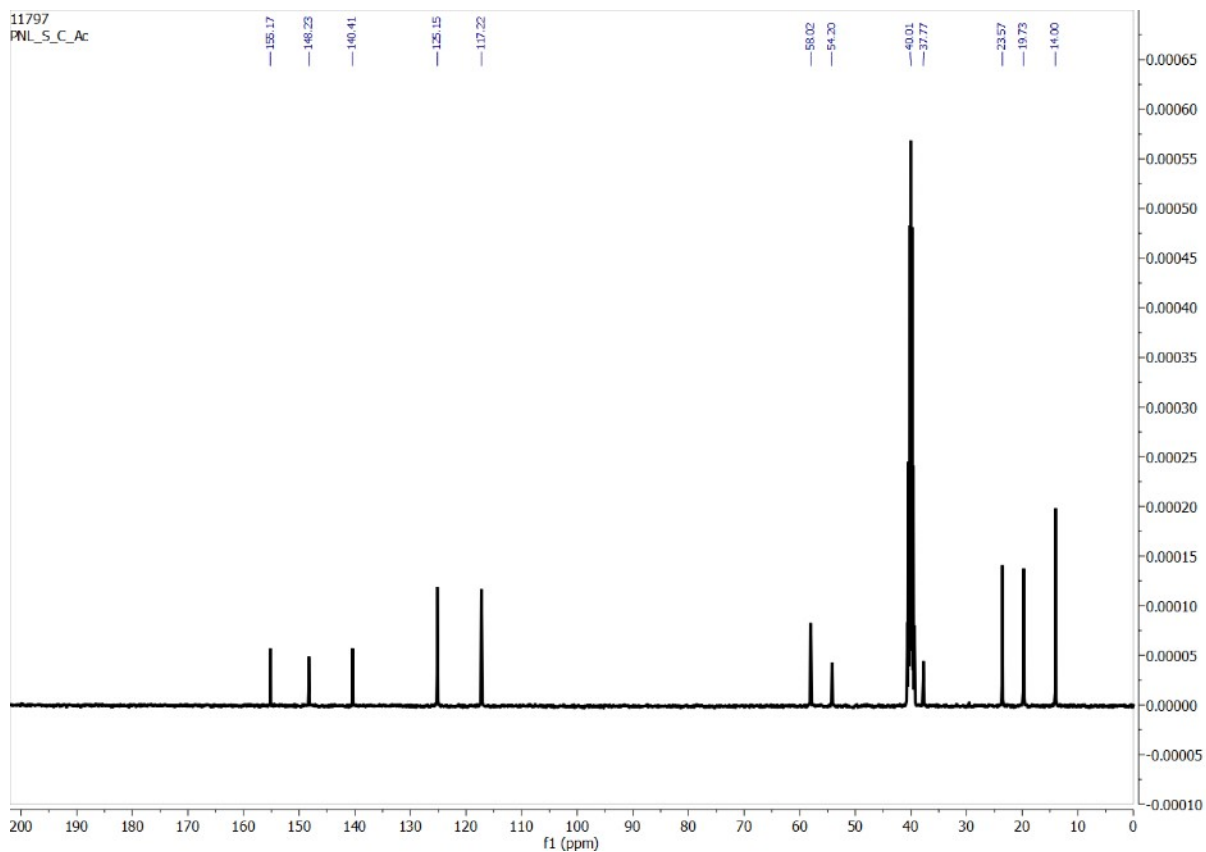

**Fig. S58.**  $^{13}\text{C-NMR}$  spectrum of  $[(n\text{-Bu}_4\text{N})_2(2\text{L}_2\cdot\text{SO}_4)]$  obtained from LLE in the presence of carbonate and acetate as competing anions (no signals for acetate and carbonate observed in the spectrum).

## 11. Selective extraction of sulfate by L<sub>3</sub>: <sup>1</sup>H-NMR spectra of LLE isolated sulfate complexes

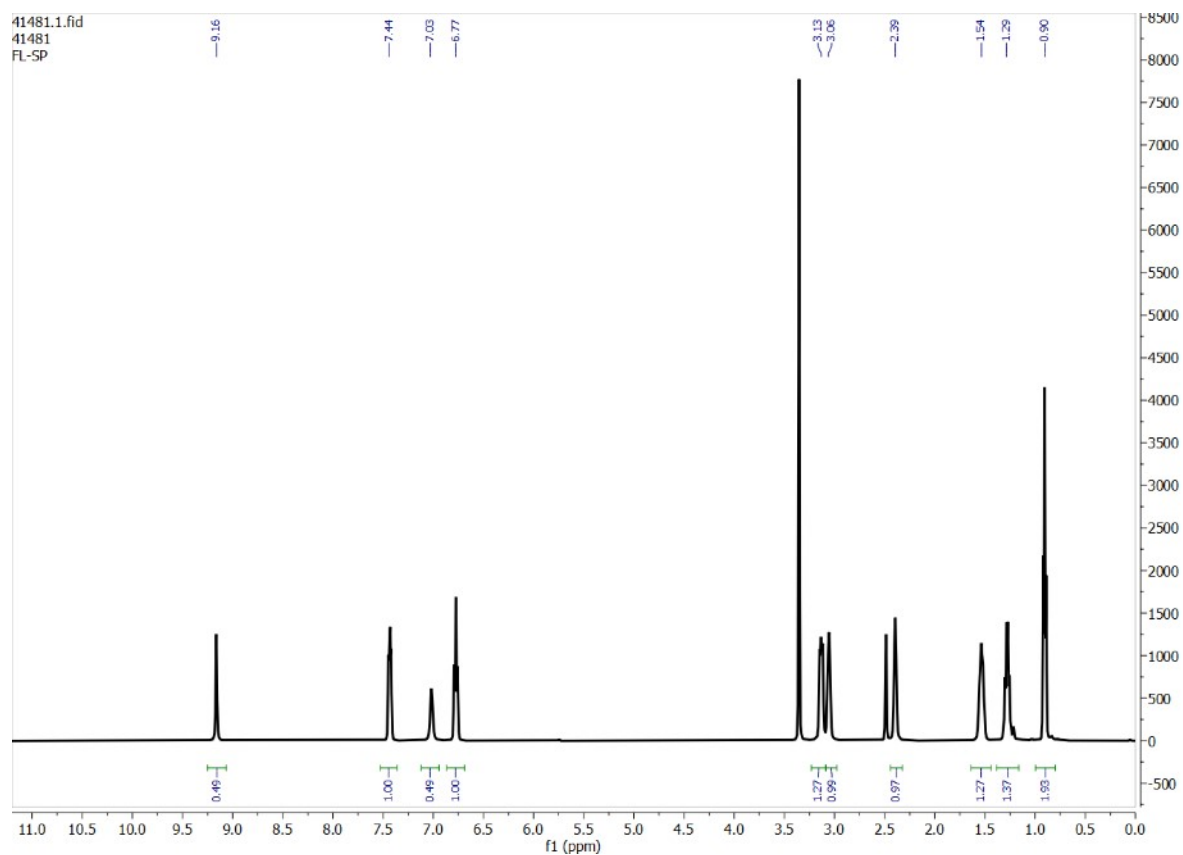

**Fig. S59.** <sup>1</sup>H-NMR spectrum of [(n-Bu<sub>4</sub>N)<sub>2</sub>(2L<sub>3</sub>·SO<sub>4</sub>)] obtained from LLE in the presence of HPO<sub>4</sub><sup>2-</sup> as a competing anion.

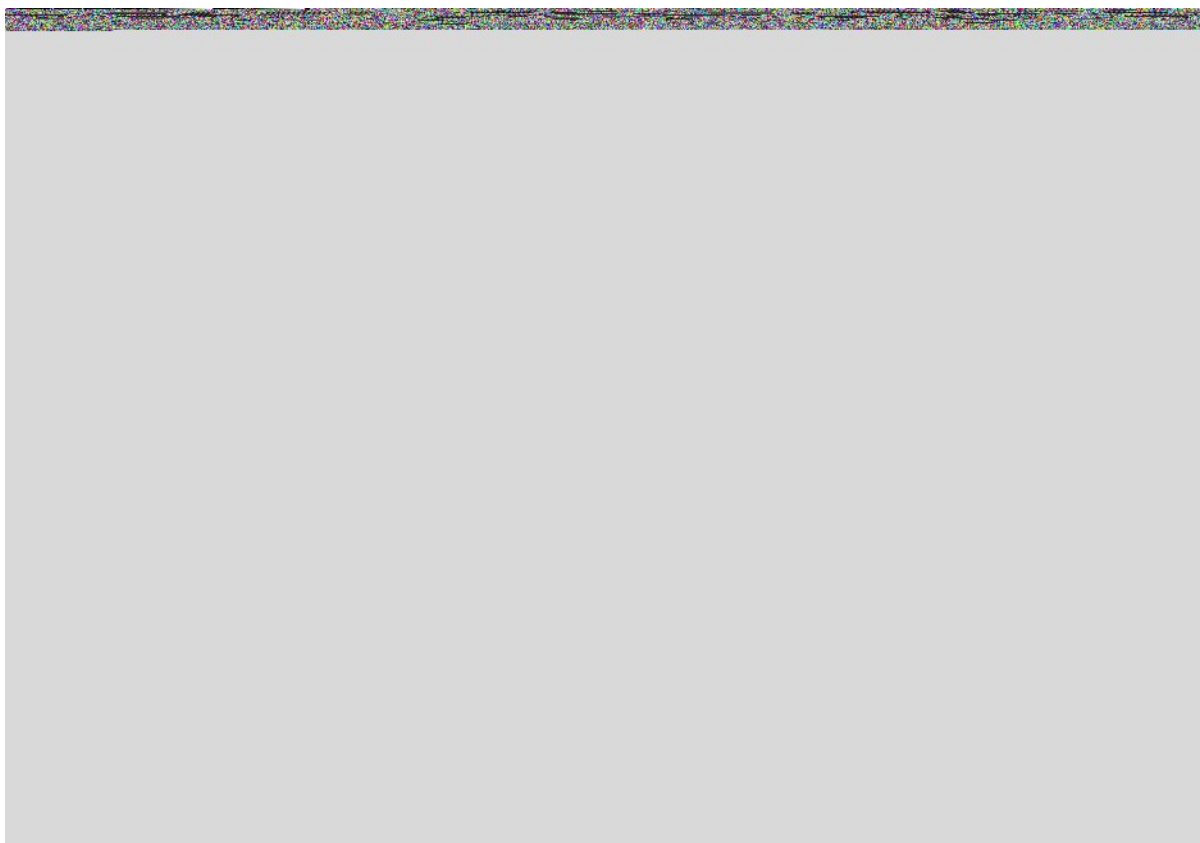

**Fig. S60.**  $^1\text{H-NMR}$  spectrum of  $[(n\text{-Bu}_4\text{N})_2(2\text{L}_3\cdot\text{SO}_4)]$  obtained from LLE in the presence of  $\text{CO}_3^{2-}$  as a competing anion.

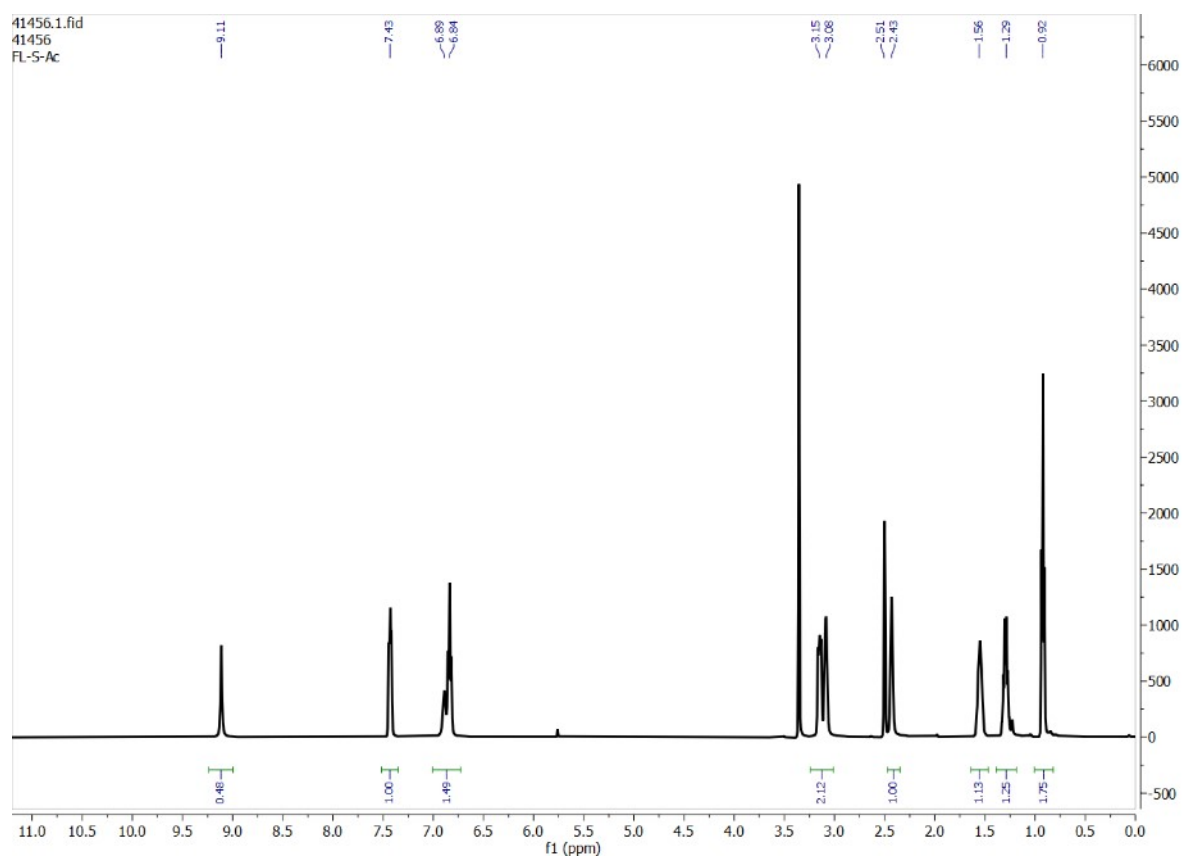

**Fig. S61.**  $^1\text{H-NMR}$  spectrum of  $[(n\text{-Bu}_4\text{N})_2(2\text{L}_3\cdot\text{SO}_4)]$  obtained from LLE in the presence of  $\text{CH}_3\text{CO}_2^-$  as a competing anion.

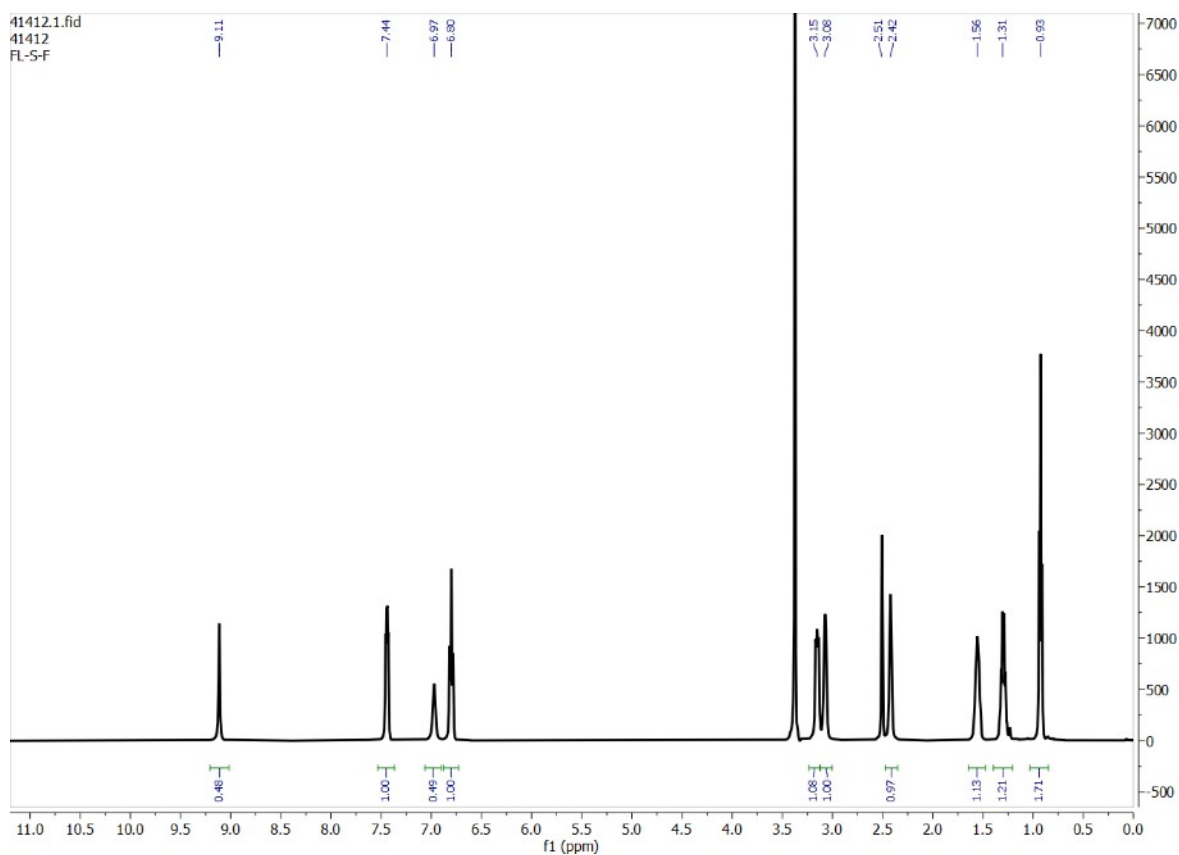

**Fig. S62.**  $^1\text{H-NMR}$  spectrum of  $[(n\text{-Bu}_4\text{N})_2(2\text{L}_3\cdot\text{SO}_4)]$  obtained from LLE in the presence of  $\text{F}^-$  as a competing anion.

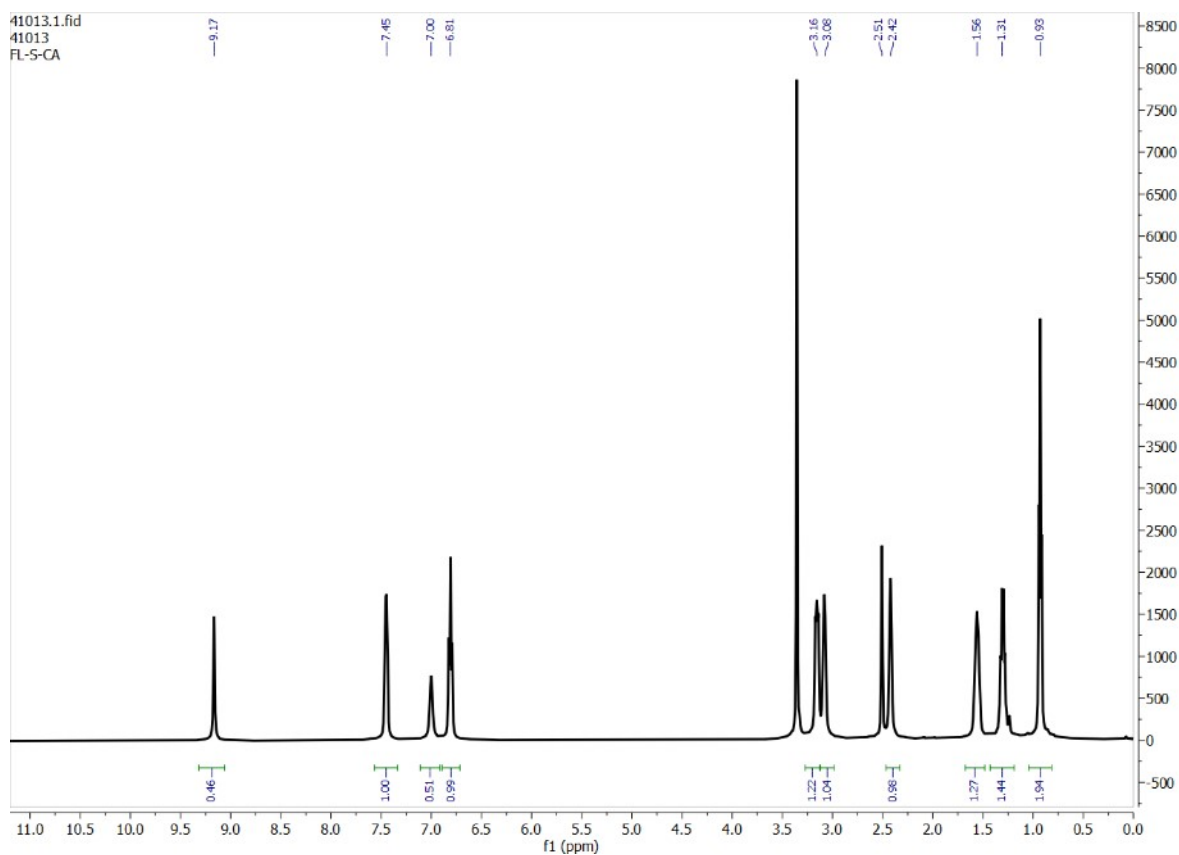

**Fig. S63.**  $^1\text{H-NMR}$  of  $[(n\text{-Bu}_4\text{N})_2(2\text{L}_3\cdot\text{SO}_4)]$  obtained from LLE in the presence of  $\text{CO}_3^{2-}$  and  $\text{CH}_3\text{CO}_2^-$  as competing anions.

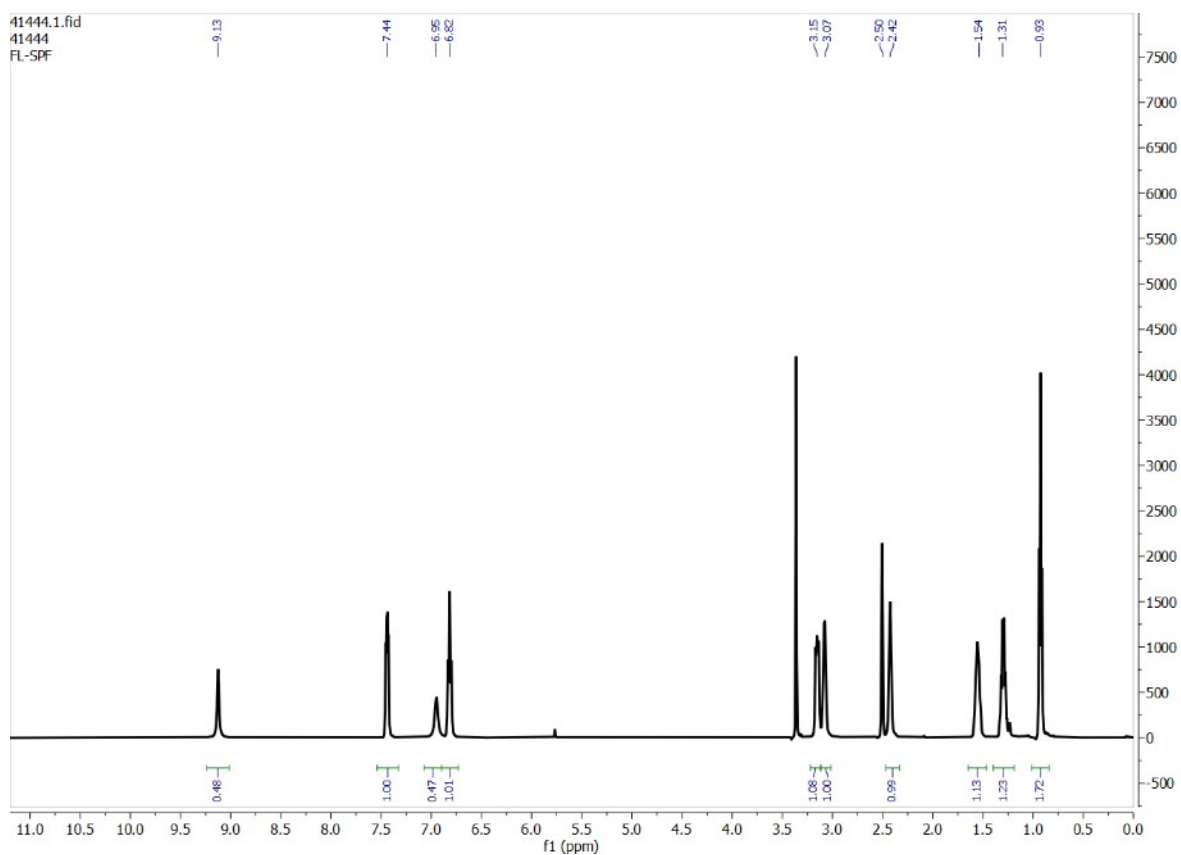

**Fig. S64.**  $^1\text{H-NMR}$  of  $[(n\text{-Bu}_4\text{N})_2(2\text{L}_3\cdot\text{SO}_4)]$  obtained from LLE in the presence of  $\text{HPO}_4^{2-}$  and  $\text{F}^-$  as competing anions.

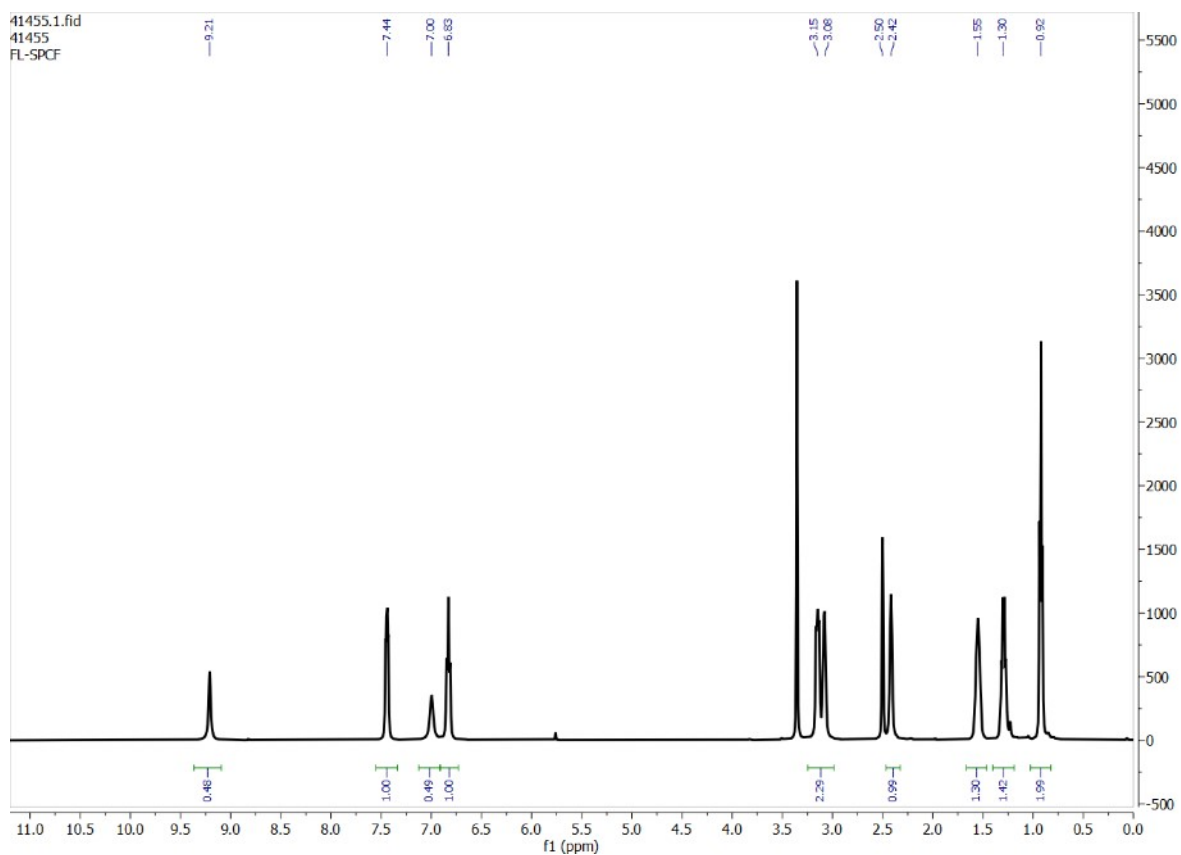

**Fig. S65.**  $^1\text{H-NMR}$  of  $[(n\text{-Bu}_4\text{N})_2(2\text{L}_3\text{-SO}_4)]$  obtained from LLE in the presence of  $\text{HPO}_4^{2-}$ ,  $\text{CO}_3^{2-}$  and  $\text{F}^-$  as competing anions (no signals for phosphate and carbonate were observed in  $^{31}\text{P}$  and  $^{13}\text{C-NMR}$  spectra).

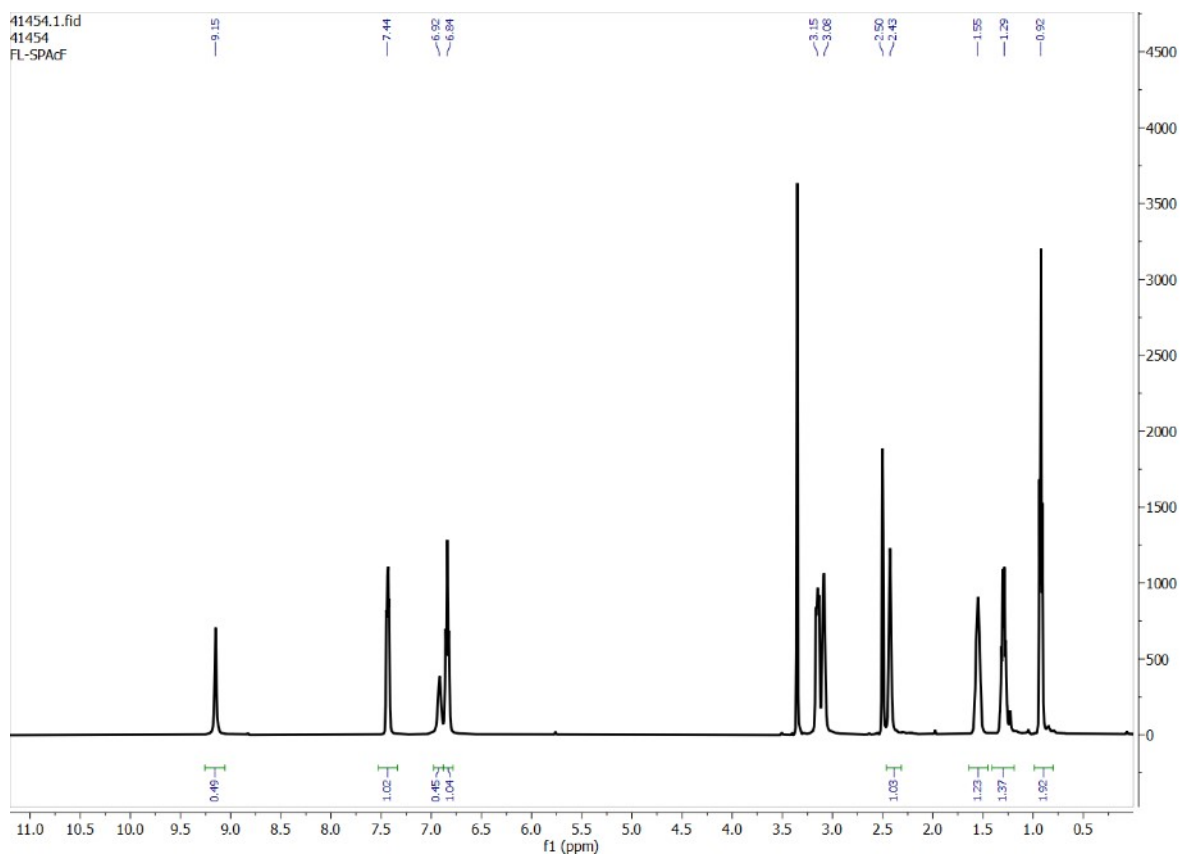

**Fig. S66.**  $^1\text{H-NMR}$  of  $[(n\text{-Bu}_4\text{N})_2(2\text{L}_3\text{-SO}_4)]$  obtained from LLE in the presence of  $\text{HPO}_4^{2-}$ ,  $\text{CH}_3\text{CO}_2^-$  and  $\text{F}^-$  as competing anions (no signal for phosphate was observed in  $^{31}\text{P-NMR}$  spectrum).



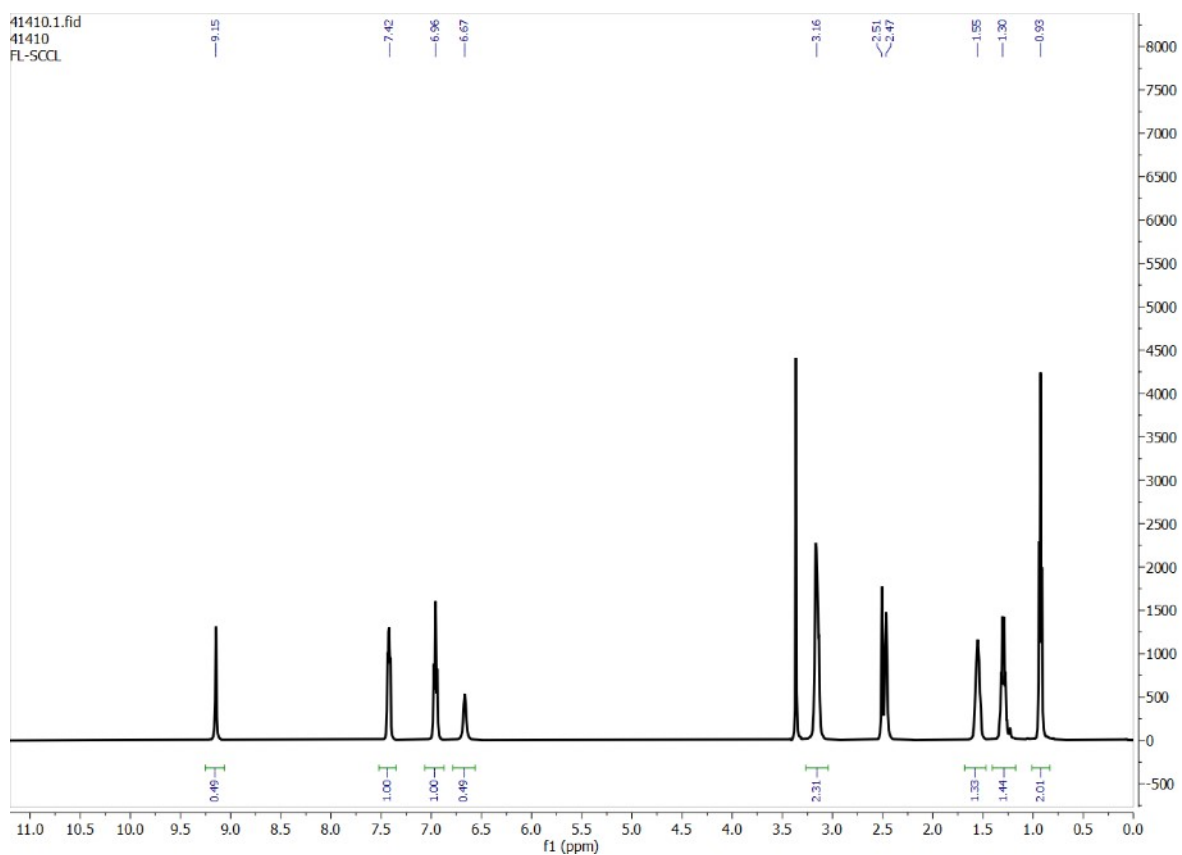

**Fig. S67.**  $^1\text{H-NMR}$  spectrum showing inefficient extraction of  $\text{SO}_4^{2-}$  by  $\text{L}_3$  from LLE in the presence of  $\text{Cl}^-$  and  $\text{CO}_3^{2-}$  as competing anions.

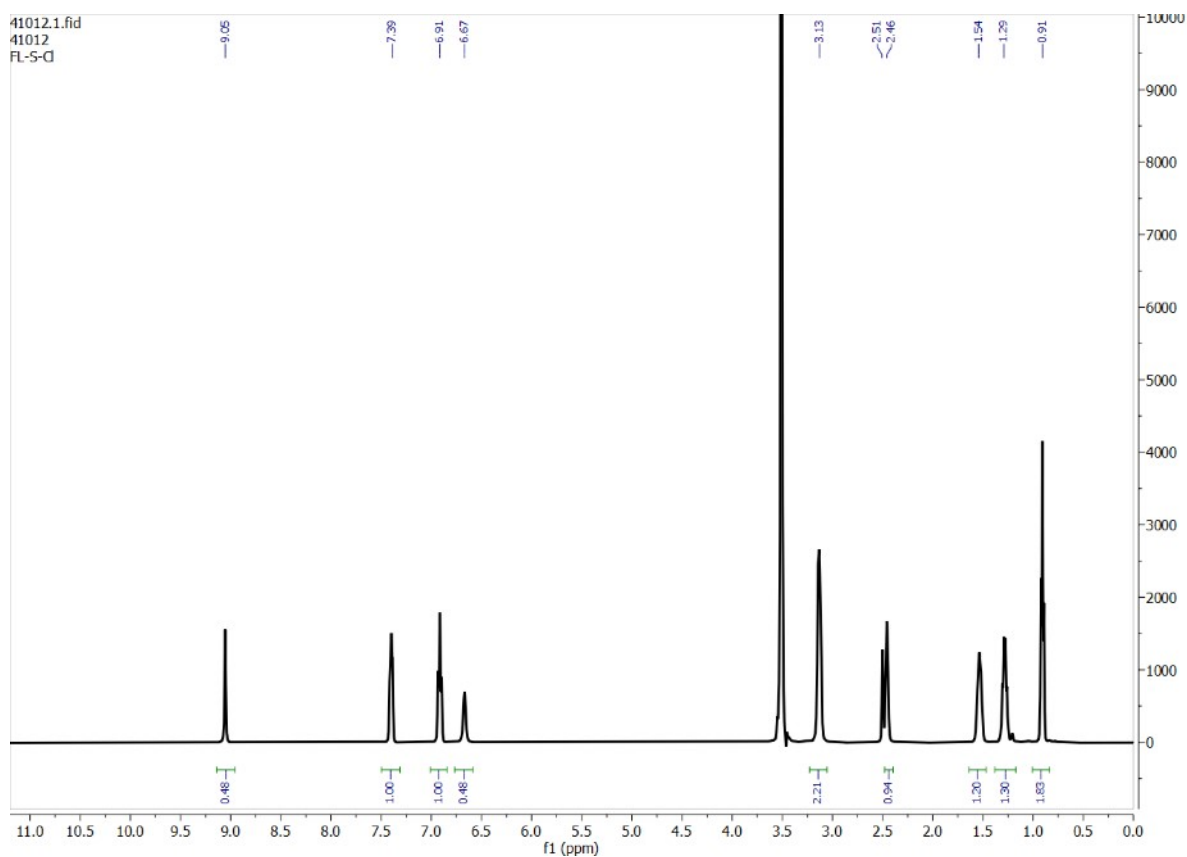

**Fig. S68.**  $^1\text{H-NMR}$  spectrum showing inefficient extraction of  $\text{SO}_4^{2-}$  by  $\text{L}_3$  from LLE in the presence of  $\text{Cl}^-$  as competing anion.

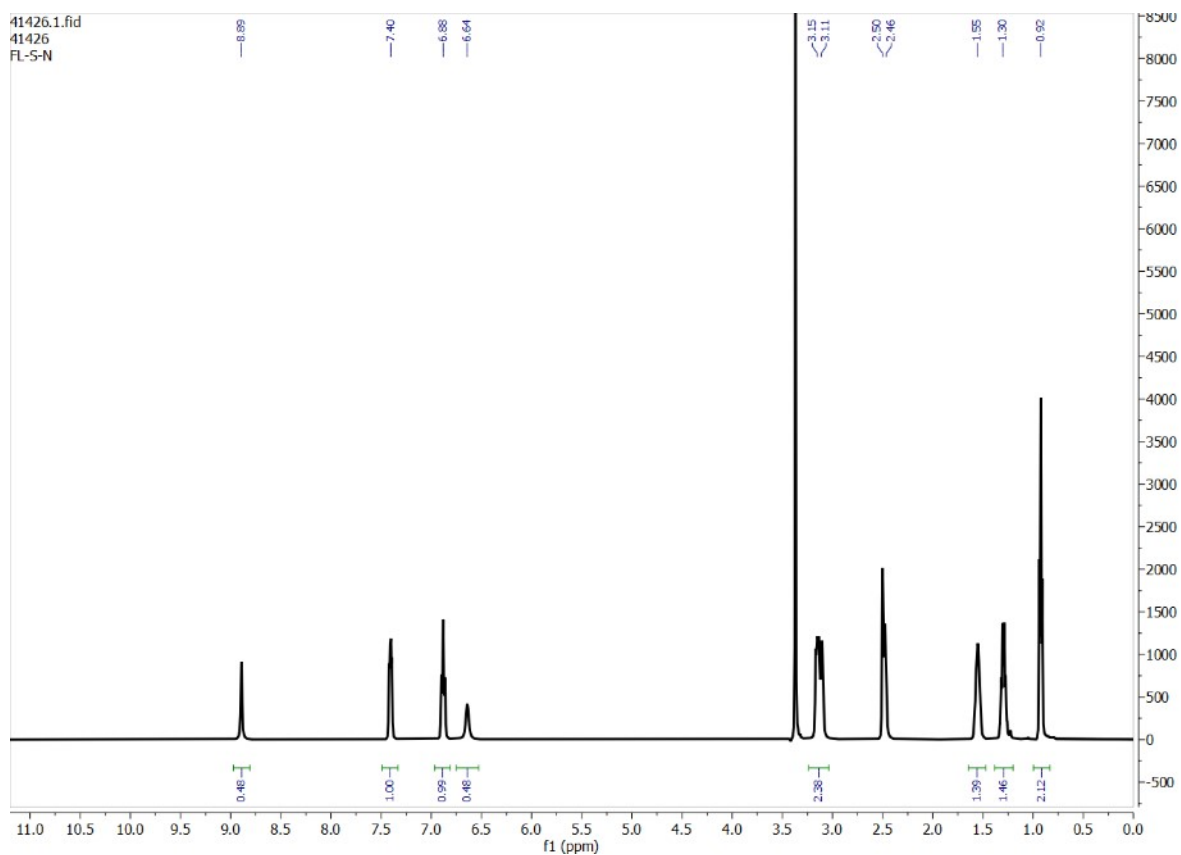

**Fig. S69.**  $^1\text{H-NMR}$  spectrum showing inefficient extraction of  $\text{SO}_4^{2-}$  by  $\text{L}_3$  from LLE in the presence of  $\text{NO}_3^-$  as competing anion.

## 12. Anion complexes of $\text{L}_4$ : Characterization by NMR spectroscopy

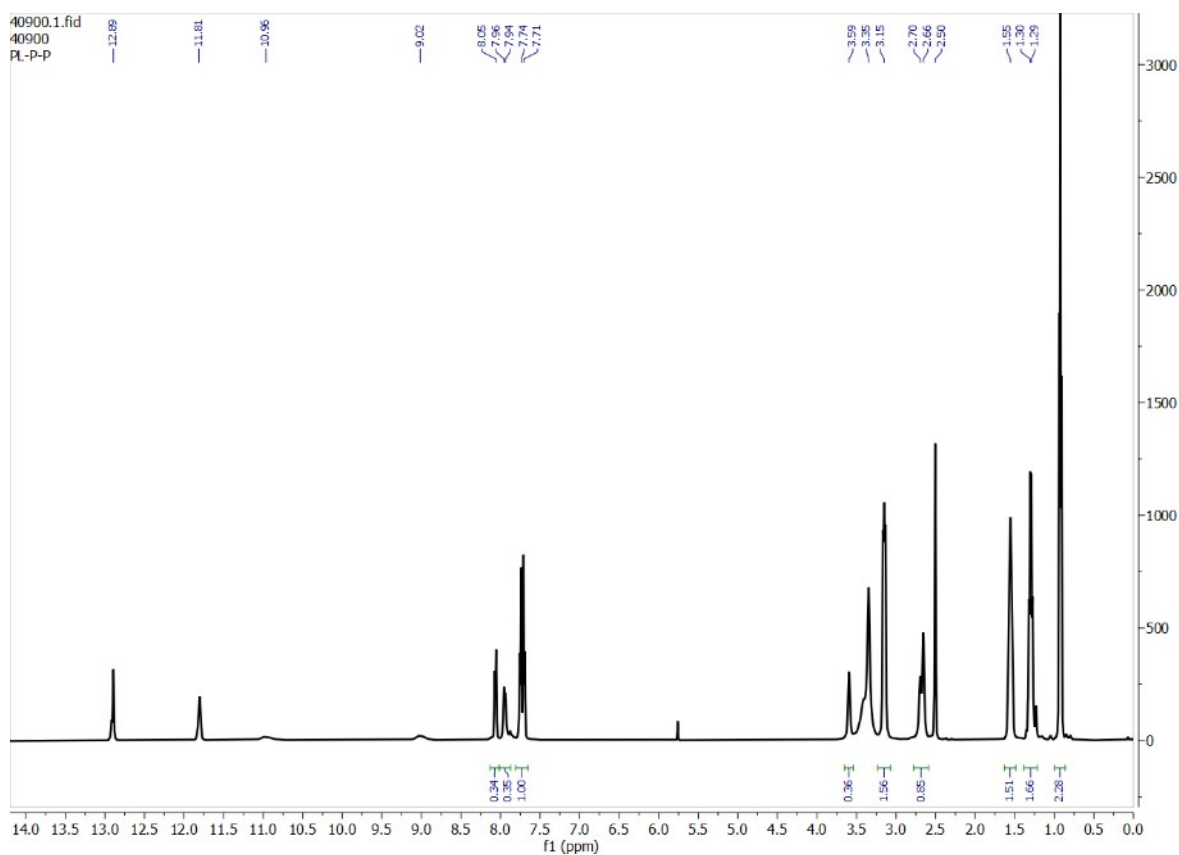

**Fig. S70.**  $^1\text{H-NMR}$  spectrum of phosphate complex ( $\text{DMSO-D}_6$ ) showing two sets of  $-\text{NH}$  and  $-\text{CH}$  signals for a mixture of  $[(n\text{-Bu}_4\text{N})_2(2\text{L}_4\cdot\text{HPO}_4)]$  and  $[(n\text{-Bu}_4\text{N})_3(2\text{L}_4\cdot\text{PO}_4)]$  with 40:60 ratio.

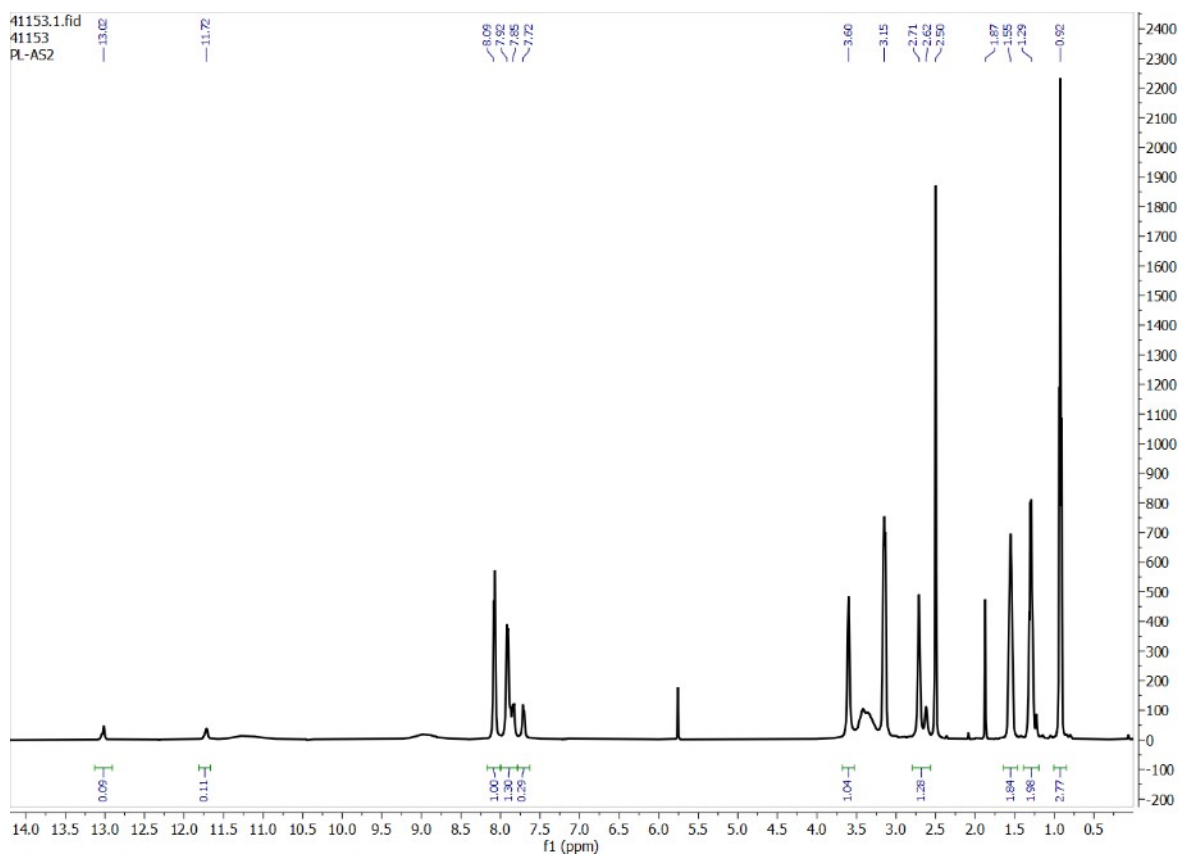

**Fig. S71.**  $^1\text{H-NMR}$  spectrum of arsenate complex ( $\text{DMSO-D}_6$ ) showing two sets of  $-\text{NH}$  and  $-\text{CH}$  signals for a mixture of  $[(n\text{-Bu}_4\text{N})_2(2\text{L}_4\cdot\text{HAsO}_4)]$  and  $[(n\text{-Bu}_4\text{N})_3(2\text{L}_4\cdot\text{AsO}_4)]$ .

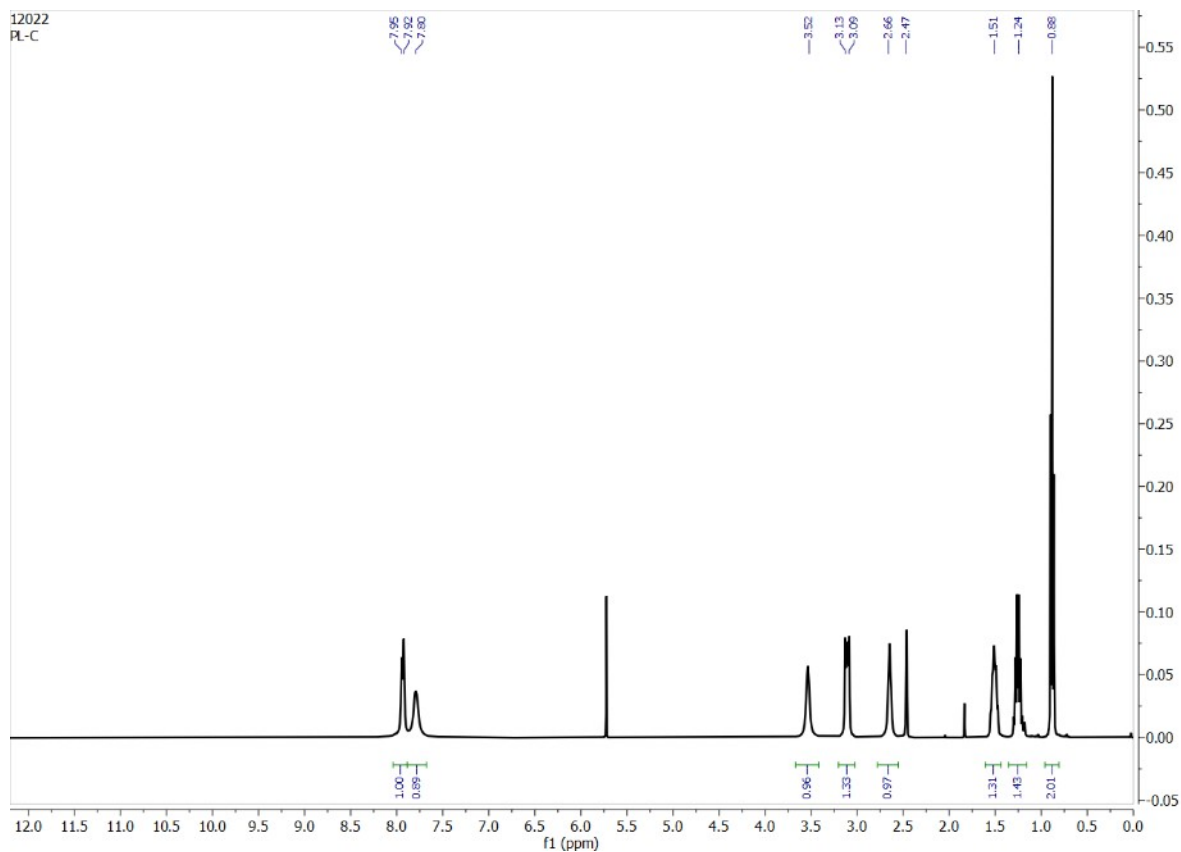

**Fig. S72.**  $^1\text{H-NMR}$  spectrum of carbonate complex,  $[(n\text{-Bu}_4\text{N})_2(2\text{L}_4\cdot\text{CO}_3)]$  in  $\text{DMSO-D}_6$ .

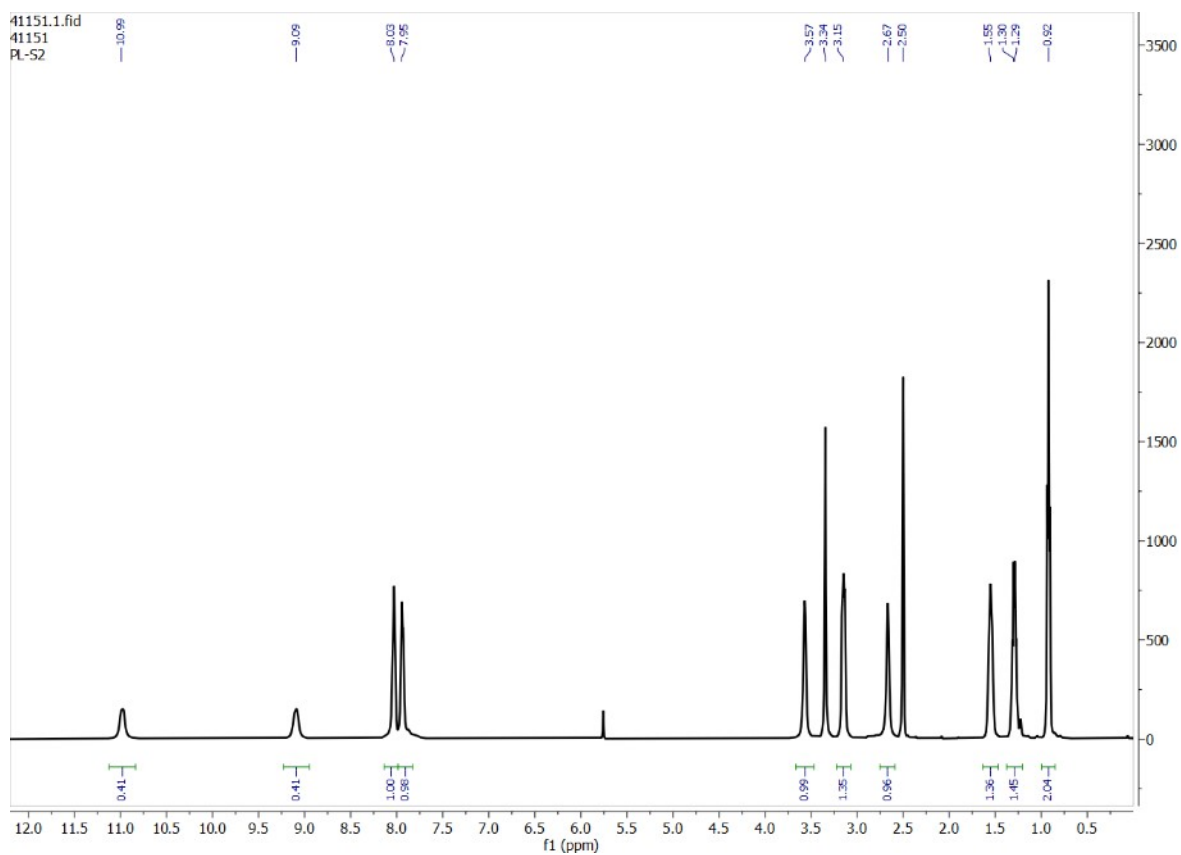

**Fig. S73.**  $^1\text{H-NMR}$  spectrum of sulfate complex,  $[(n\text{-Bu}_4\text{N})_2(2\text{L}_4\cdot\text{SO}_4)]$  in  $\text{DMSO-D}_6$ .

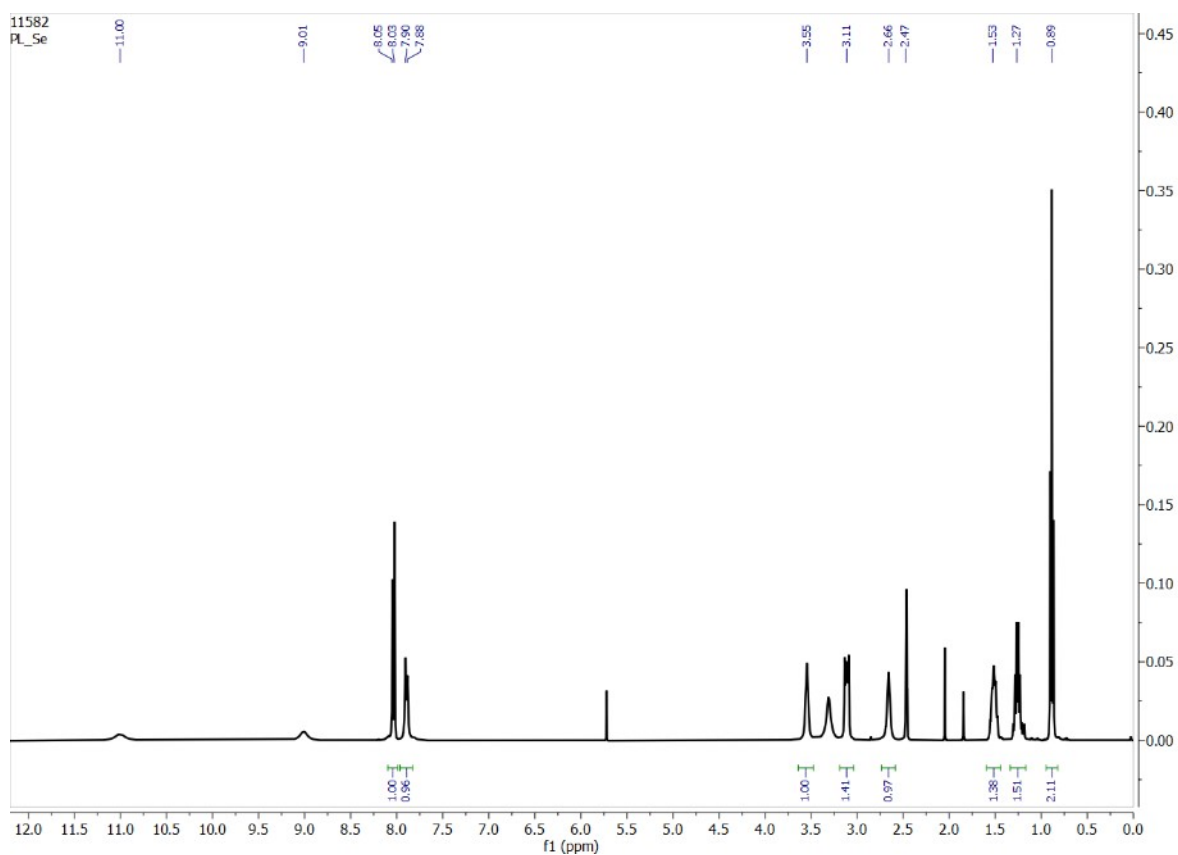

**Fig. S74.**  $^1\text{H-NMR}$  spectrum of selenate complex,  $[(n\text{-Bu}_4\text{N})_2(2\text{L}_4\cdot\text{SeO}_4)]$  in  $\text{DMSO-D}_6$ .

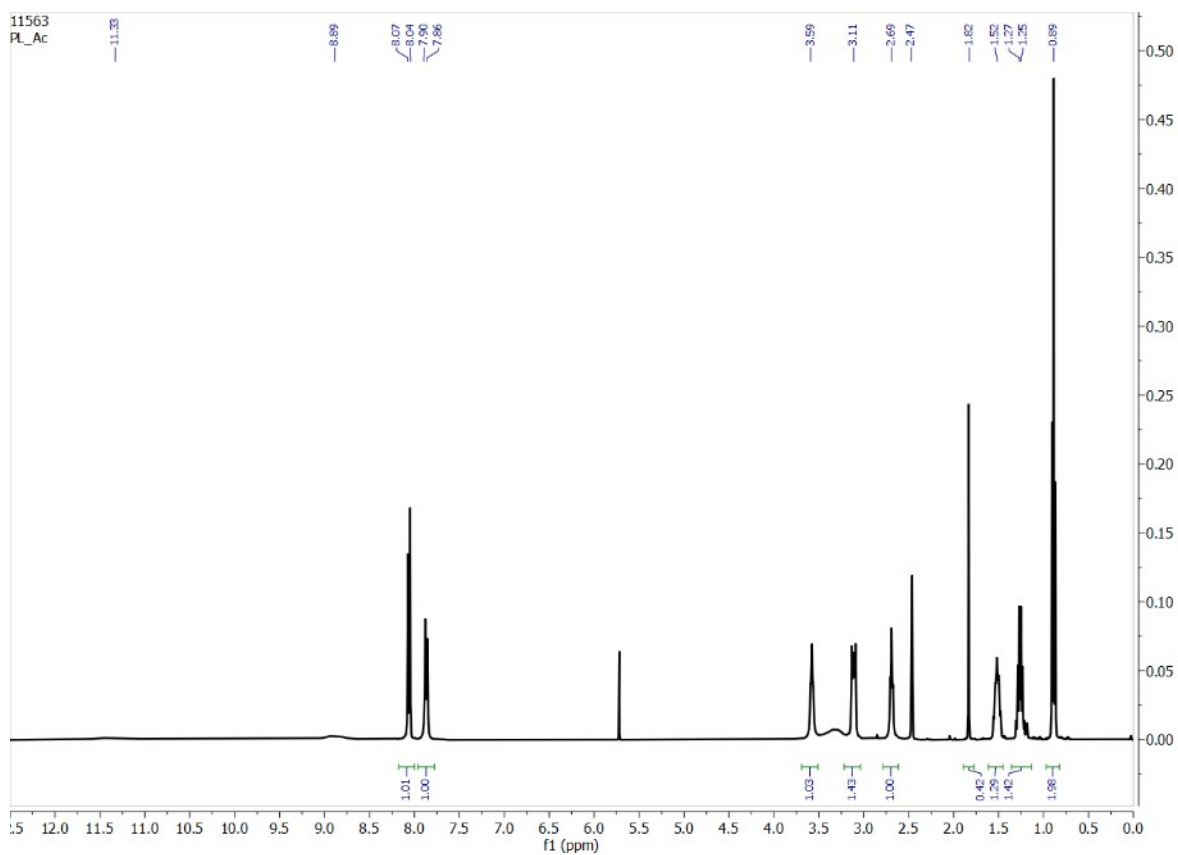

**Fig. S75.**  $^1\text{H-NMR}$  spectrum of acetate complex,  $[(n\text{-Bu}_4\text{N})(\text{L}_4\cdot\text{CH}_3\text{CO}_2)]$  in  $\text{DMSO-D}_6$ .

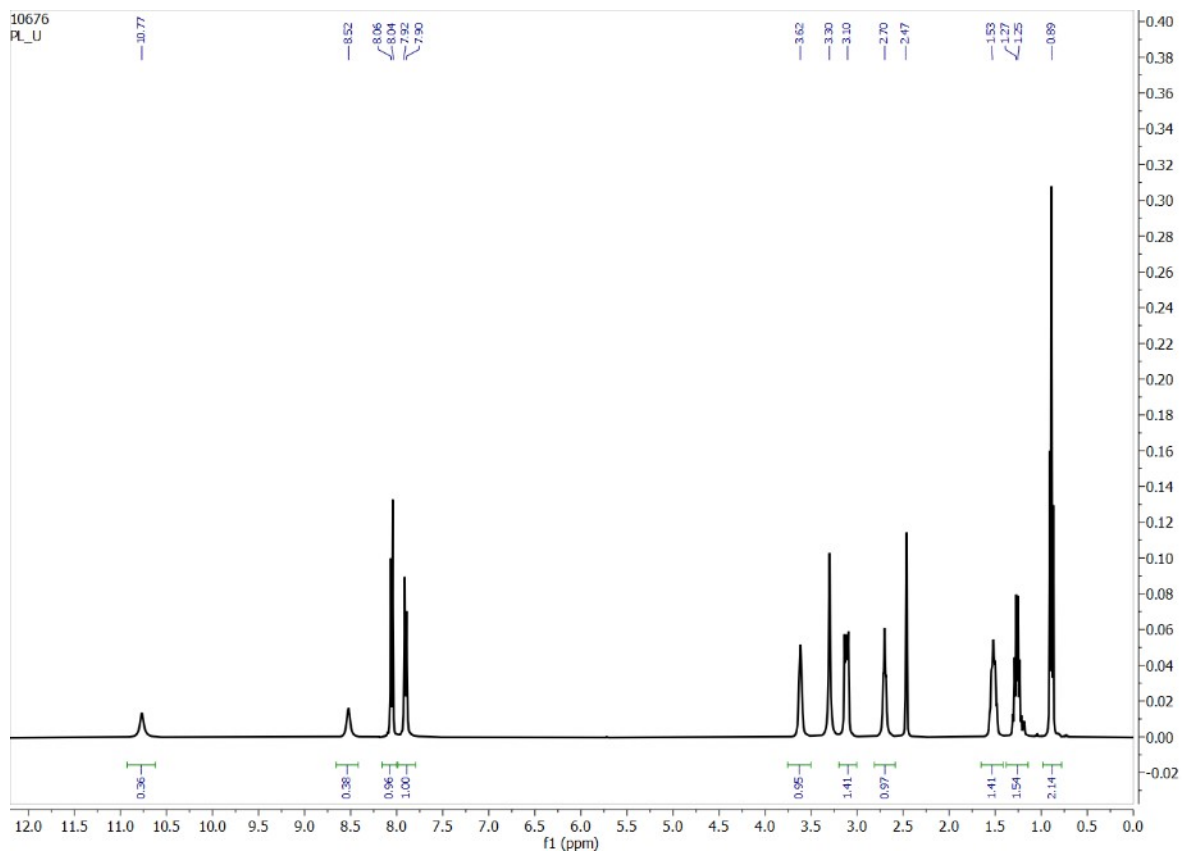

**Fig. S76.**  $^1\text{H-NMR}$  spectrum of chloride complex,  $[(n\text{-Bu}_4\text{N})(\text{L}_4\cdot\text{Cl})]$  in  $\text{DMSO-D}_6$ .

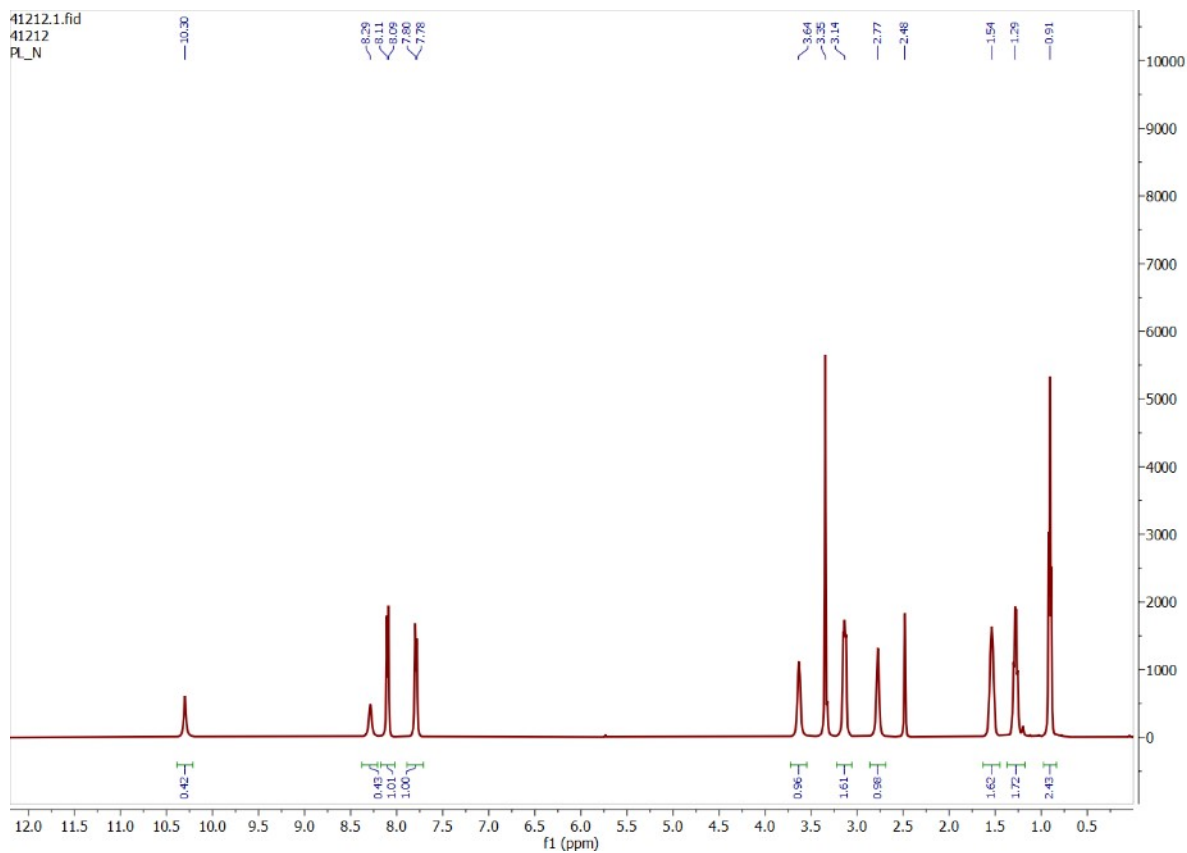

**Fig. S77.**  $^1\text{H-NMR}$  spectrum of nitrate complex,  $[(n\text{-Bu}_4\text{N})(\text{L}_4\cdot\text{NO}_3)]$  in  $\text{DMSO-D}_6$ .

### 13. Selective extraction of phosphate by L<sub>4</sub>: <sup>1</sup>H and <sup>31</sup>P-NMR spectra of isolated phosphate complexes

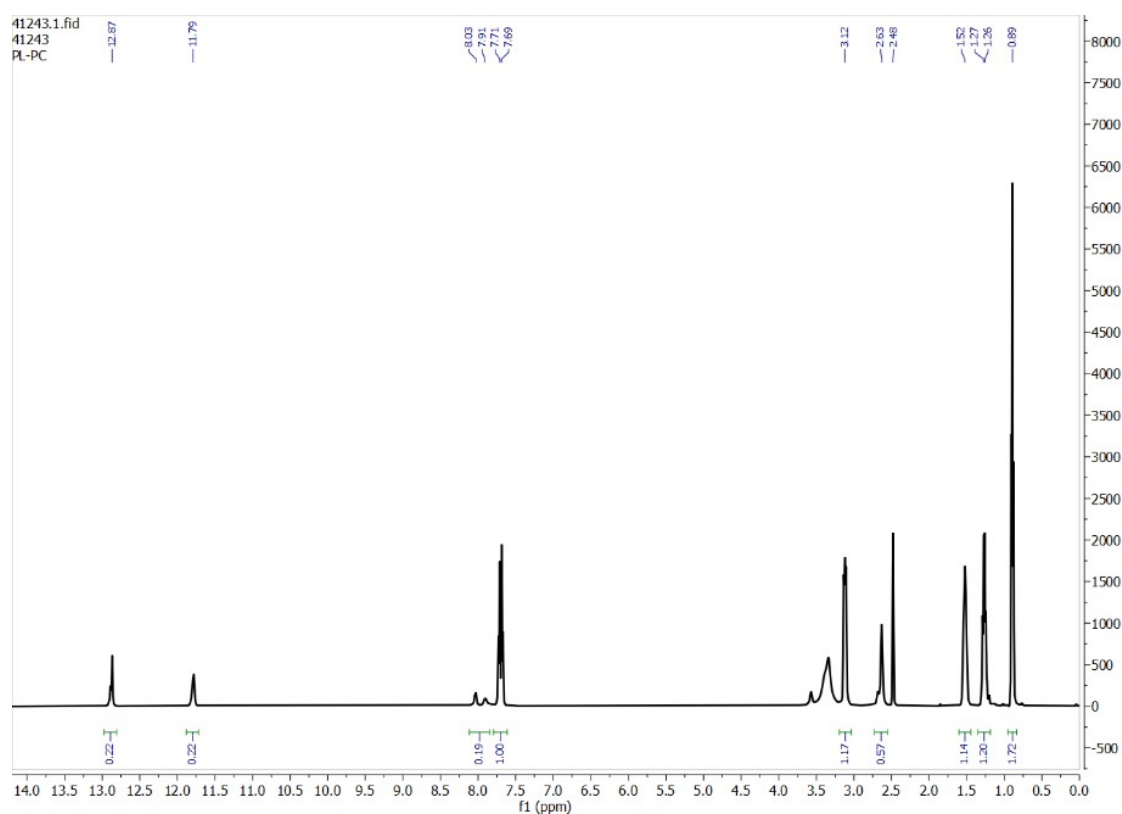

**Fig. S78.** <sup>1</sup>H-NMR spectrum of phosphate complex obtained from LLE in the presence of carbonate as a competing anion, two sets of aromatic -CH signals observed for a mixture of [(n-Bu<sub>4</sub>N)<sub>2</sub>(2L<sub>4</sub>·HPO<sub>4</sub>)] and [(n-Bu<sub>4</sub>N)<sub>3</sub>(2L<sub>4</sub>·PO<sub>4</sub>)] with ≈ 10:90 ratio.

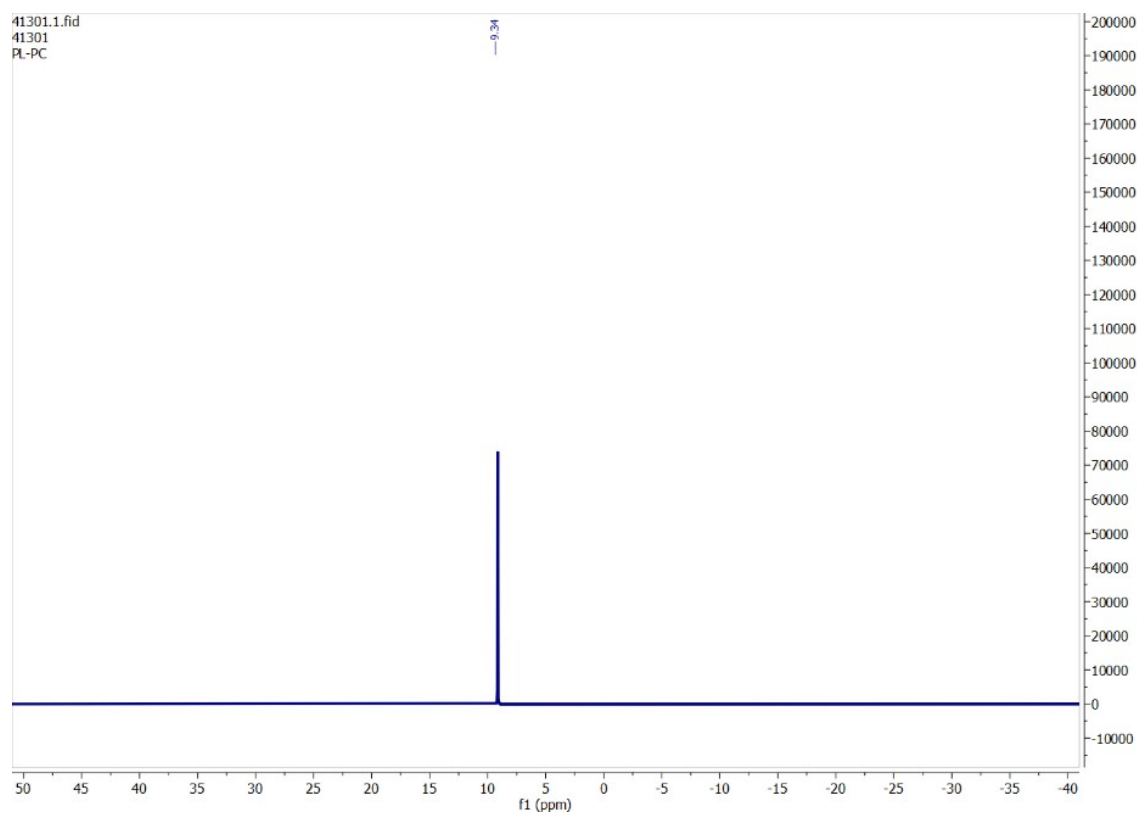

**Fig. S79.**  $^{31}\text{P}$ -NMR spectrum of phosphate complex obtained from LLE in the presence of carbonate as a competing anion.

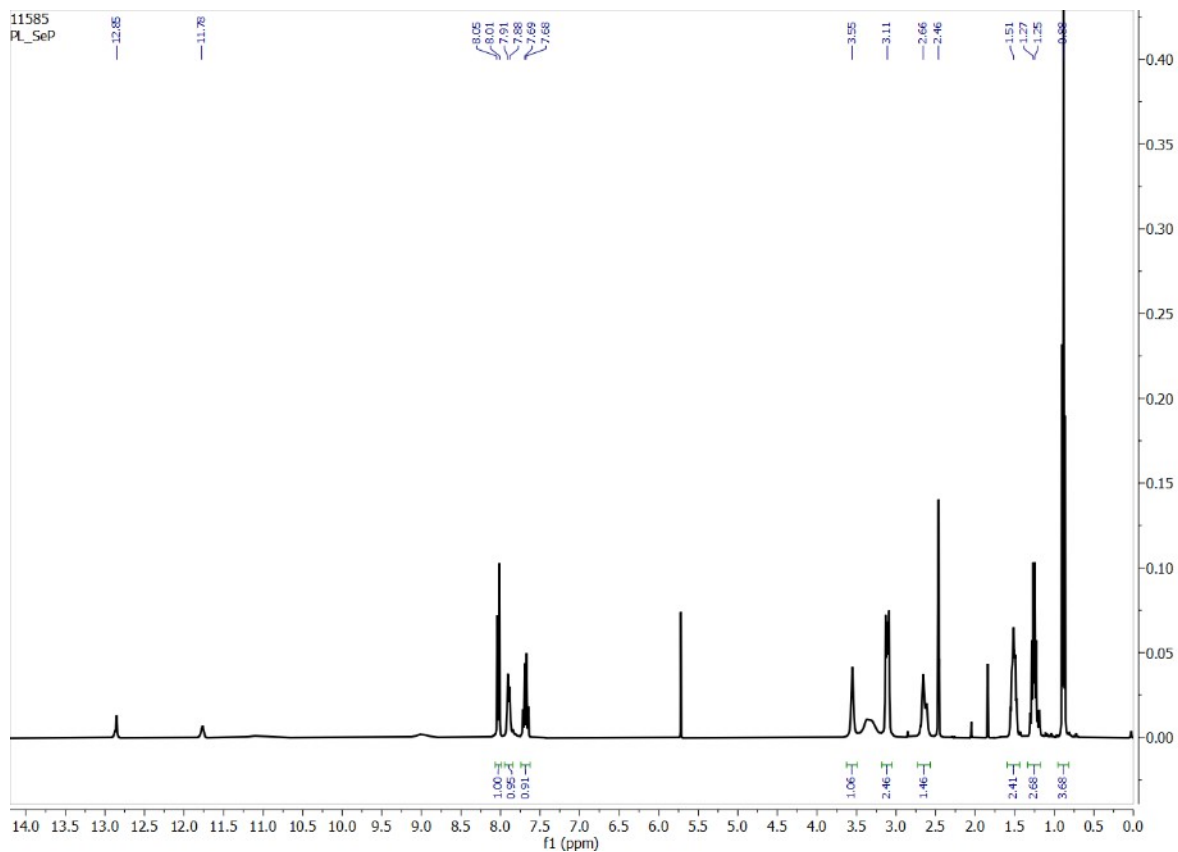

**Fig. S80.**  $^1\text{H}$ -NMR spectrum of phosphate complex obtained from LLE in the presence of selenate, two sets of -NH and aromatic -CH signals were observed for a mixture of  $[(n\text{-Bu}_4\text{N})_2(2\text{L}_4\text{-HPO}_4)]$  and  $[(n\text{-Bu}_4\text{N})_3(2\text{L}_4\text{-PO}_4)]$  with  $\approx 70:30$  ratio.



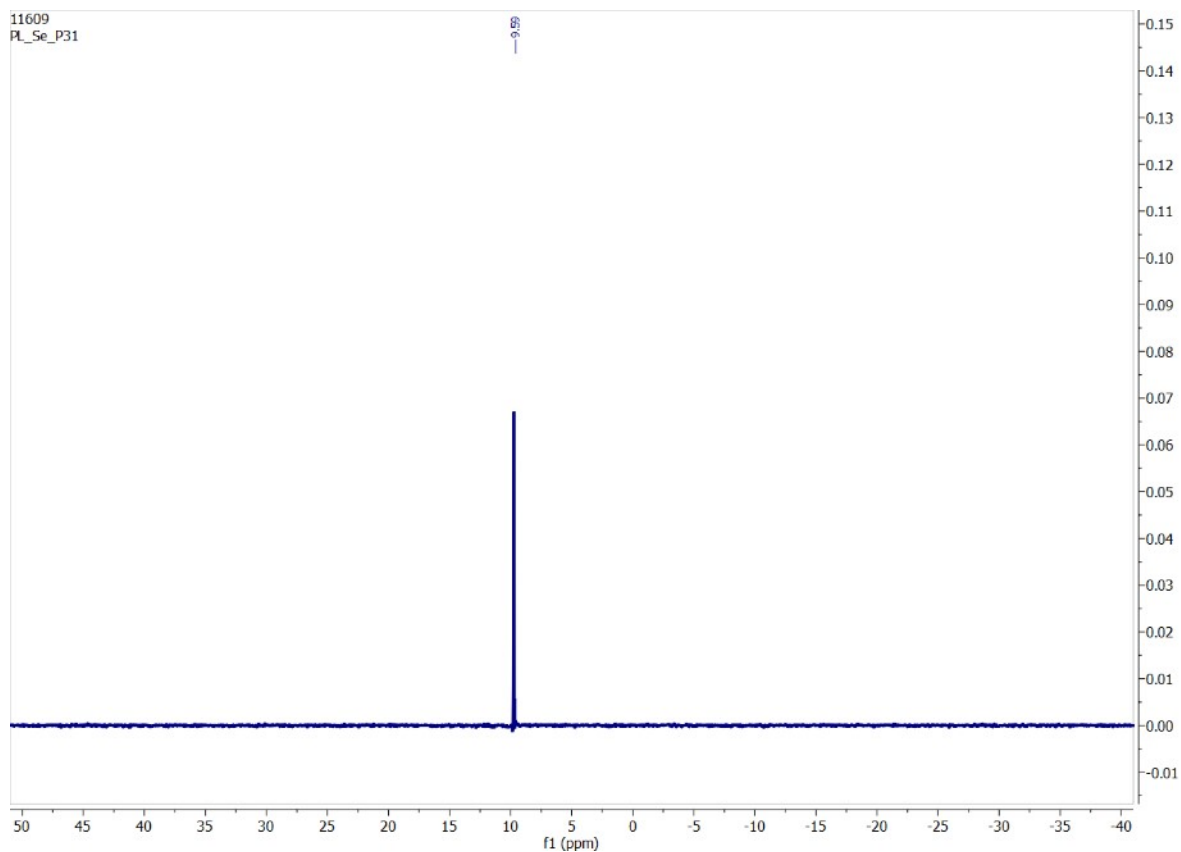

**Fig. S81.**  $^{31}\text{P}$ -NMR spectrum of phosphate complex obtained from LLE in the presence of selenate as competing anion.

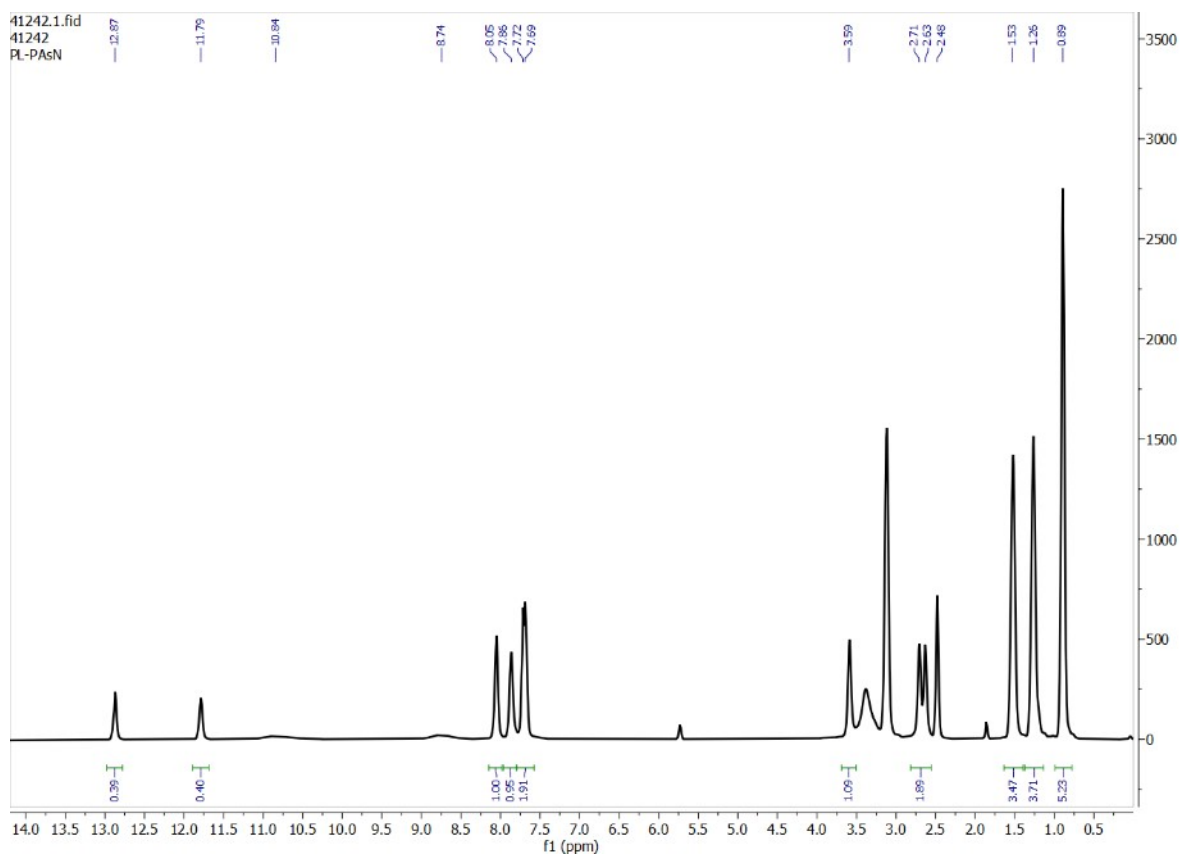

**Fig. S82.**  $^1\text{H}$ -NMR spectrum of phosphate complex obtained from LLE in the presence of  $\text{HAsO}_4^{2-}$  and  $\text{NO}_3^-$ , two sets of -NH and aromatic -CH signals observed for a mixture of  $[(\text{n-Bu}_4\text{N})_2(2\text{L}_4\cdot\text{HPO}_4)]$  and  $[(\text{n-Bu}_4\text{N})_3(2\text{L}_4\cdot\text{PO}_4)]$  with  $\approx 50:50$  ratio.

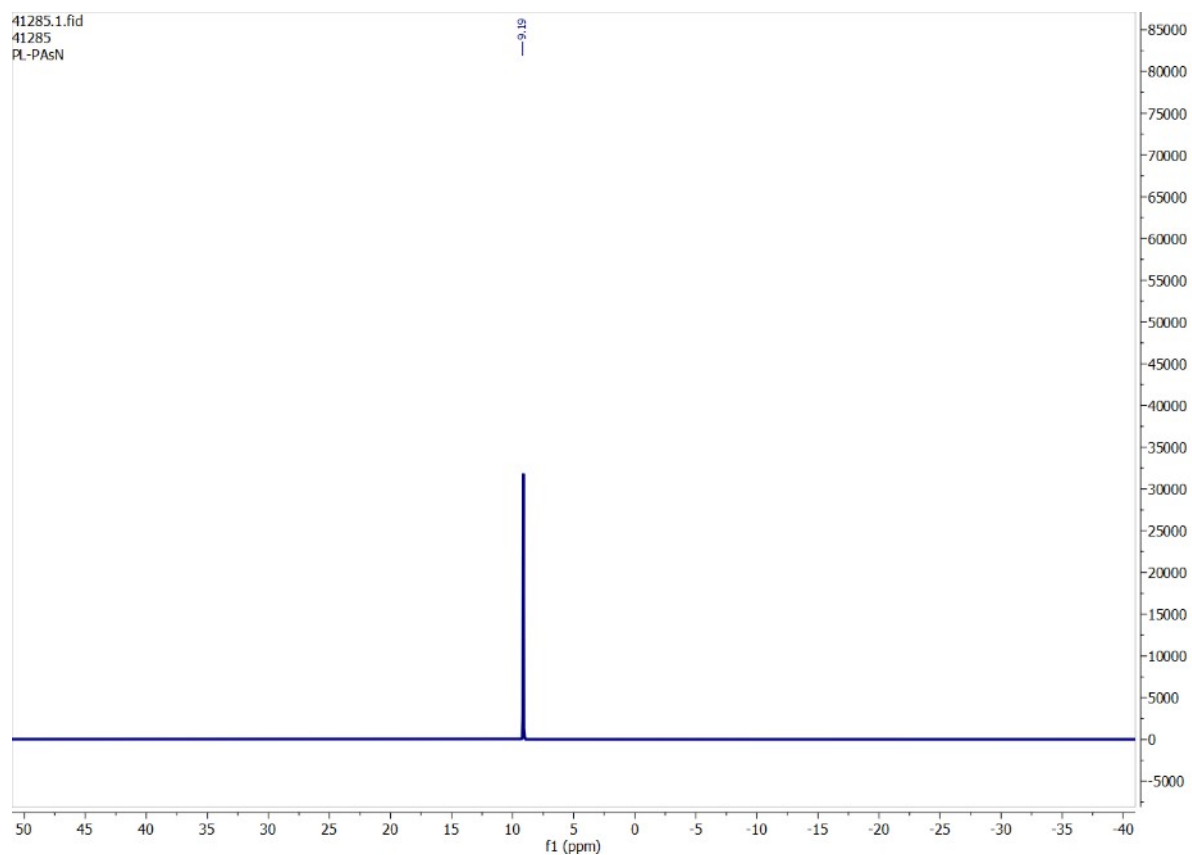

**Fig. S83.**  $^{31}\text{P}$ -NMR spectrum of phosphate complex obtained from LLE in the presence of  $\text{HAsO}_4^{2-}$  and  $\text{NO}_3^-$  as competing anions.

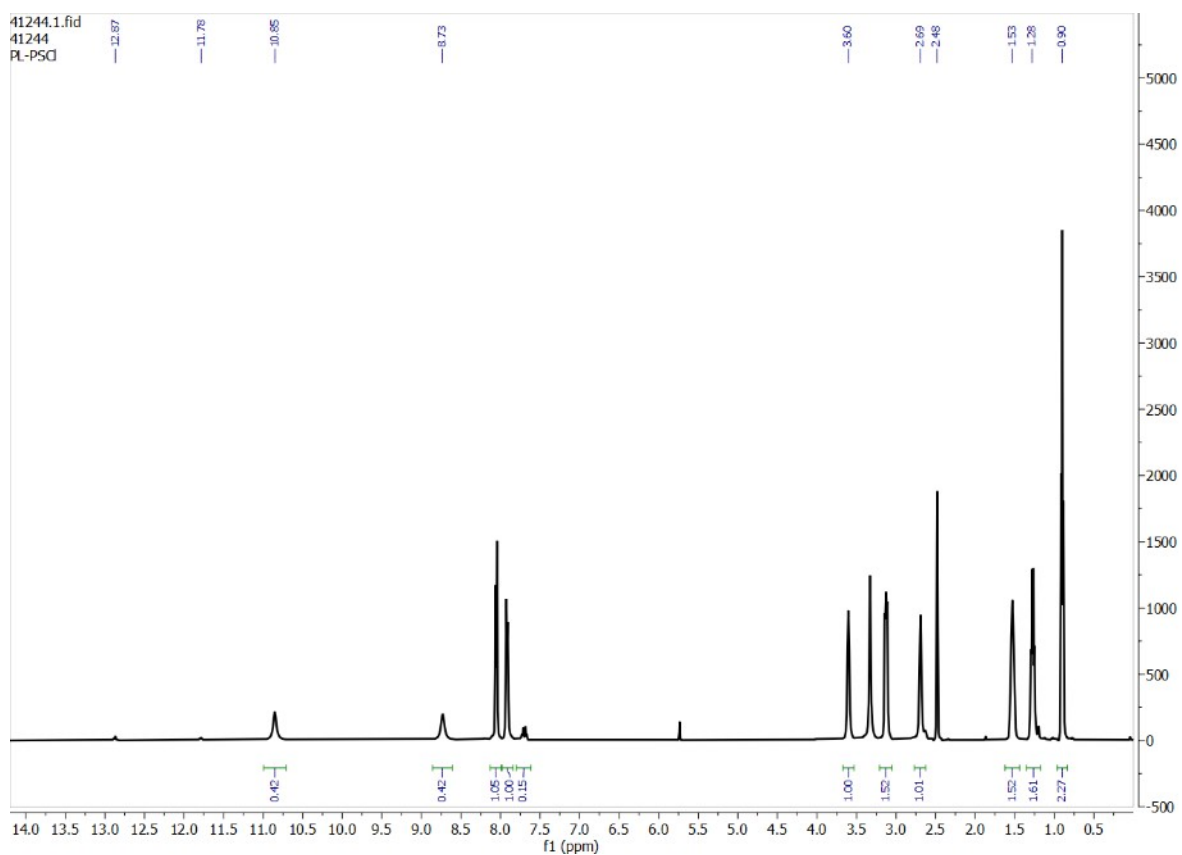

**Fig. S84.**  $^1\text{H-NMR}$  spectrum of phosphate complex obtained from LLE in the presence of  $\text{SO}_4^{2-}$  and  $\text{Cl}^-$ , two sets of  $-\text{NH}$  and aromatic  $-\text{CH}$  signals observed for a mixture of  $[(n\text{-Bu}_4\text{N})_2(2\text{L}_4\text{-HPO}_4)]$  and  $[(n\text{-Bu}_4\text{N})_3(2\text{L}_4\text{-PO}_4)]$  with  $\approx 90:10$  ratio.

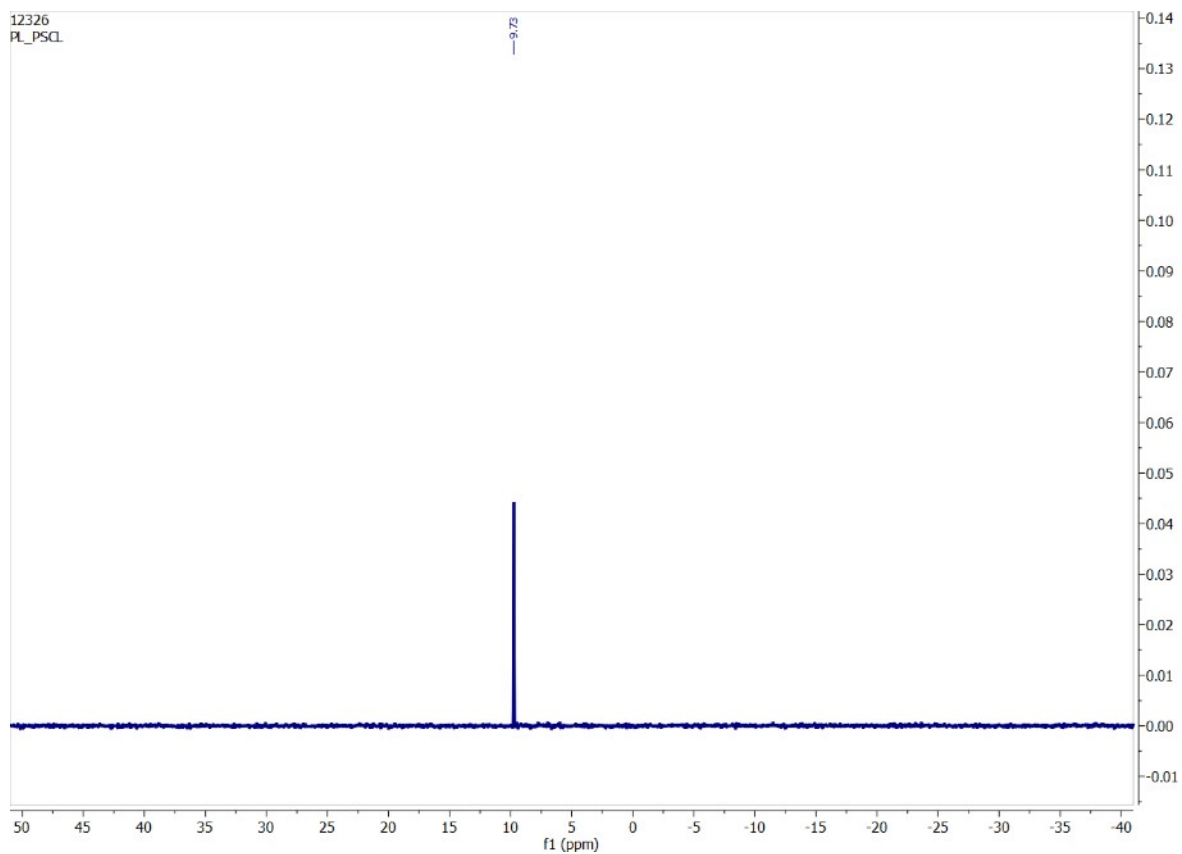

**Fig. S85.**  $^{31}\text{P}$ -NMR spectrum of phosphate complex obtained from LLE in the presence of sulfate and chloride as competing anions.

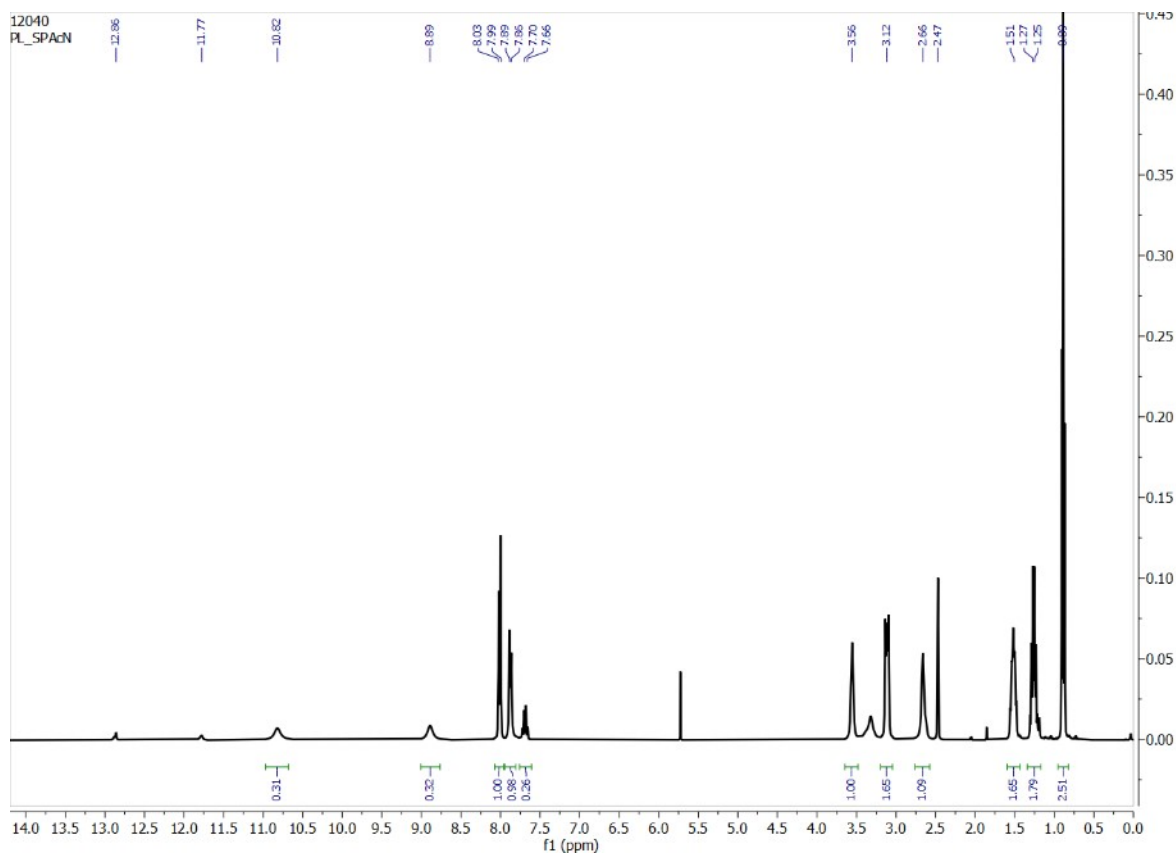

**Fig. S86.**  $^1\text{H}$ -NMR spectrum of phosphate complex obtained from LLE in the presence of  $\text{SO}_4^{2-}$  and  $\text{NO}_3^-$ , two sets of -NH and aromatic -CH signals observed for a mixture of  $[(n\text{-Bu}_4\text{N})_2(2\text{L}_4\cdot\text{HPO}_4)]$  and  $[(n\text{-Bu}_4\text{N})_3(2\text{L}_4\cdot\text{PO}_4)]$  with  $\approx 90:10$  ratio.

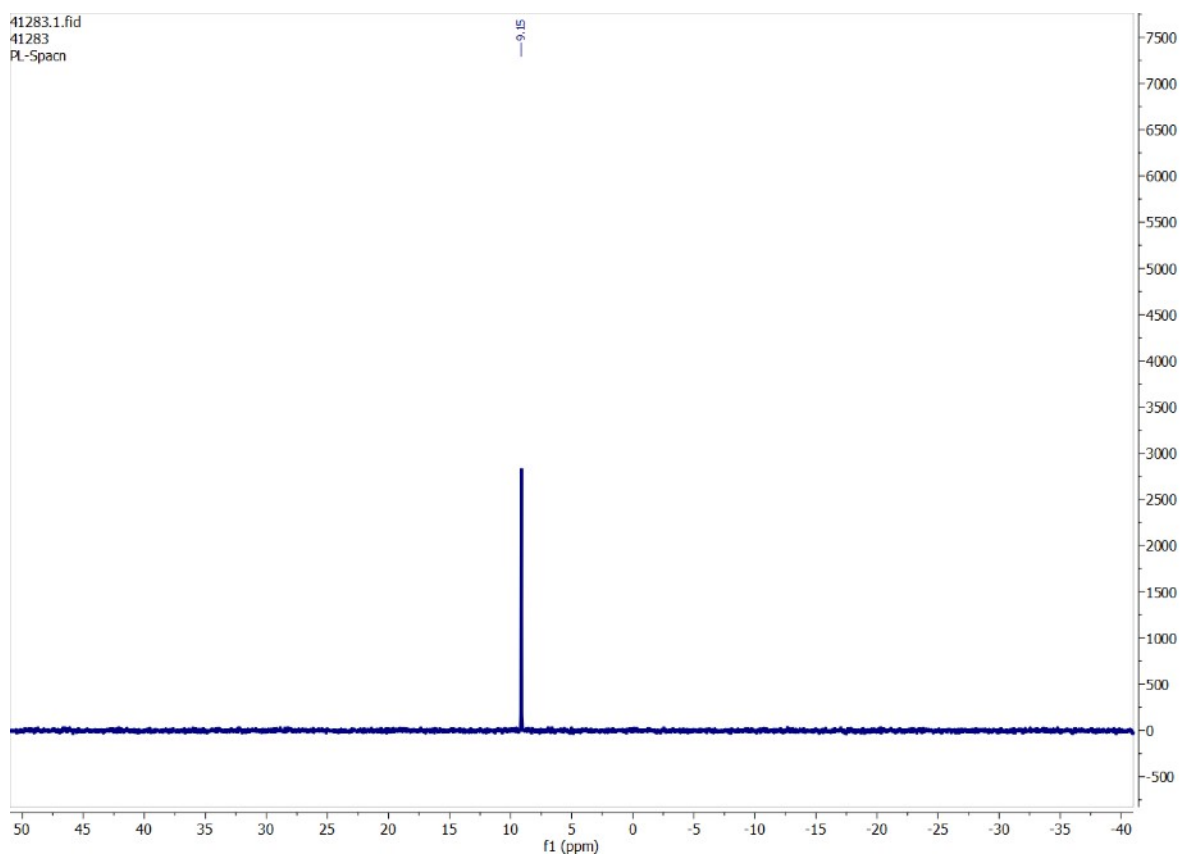

**Fig. S87.**  $^{31}\text{P}$ -NMR spectrum of phosphate complex obtained from LLE in the presence of sulfate and nitrate as competing anions.

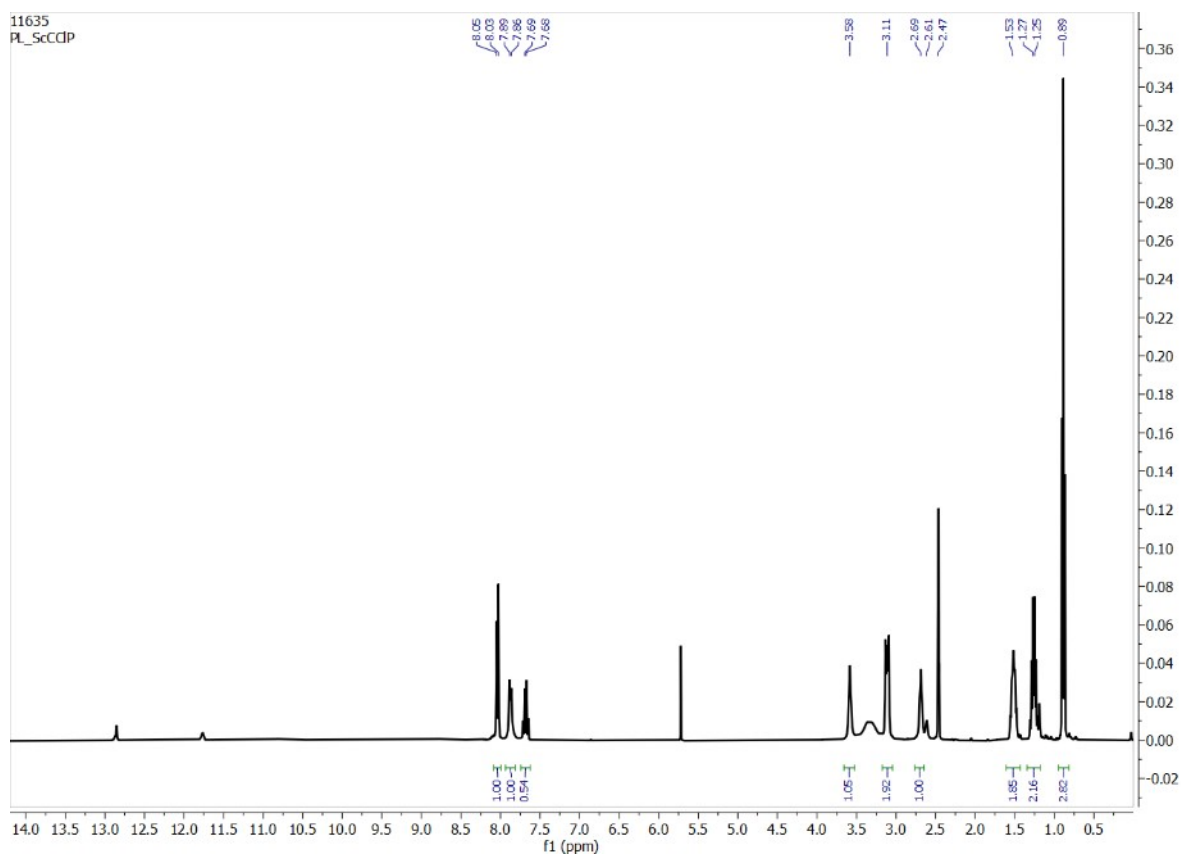

**Fig. S88.**  $^1\text{H}$ -NMR spectrum of phosphate complex obtained from LLE in the presence of  $\text{SeO}_4^{2-}$  and  $\text{CO}_3^{2-}$  and  $\text{Cl}^-$ , two sets of aromatic -CH signals observed for a mixture of  $[(n\text{-Bu}_4\text{N})_2(2\text{L}_4\cdot\text{HPO}_4)]$  and  $[(n\text{-Bu}_4\text{N})_3(2\text{L}_4\cdot\text{PO}_4)]$  with 80:20 ratio.

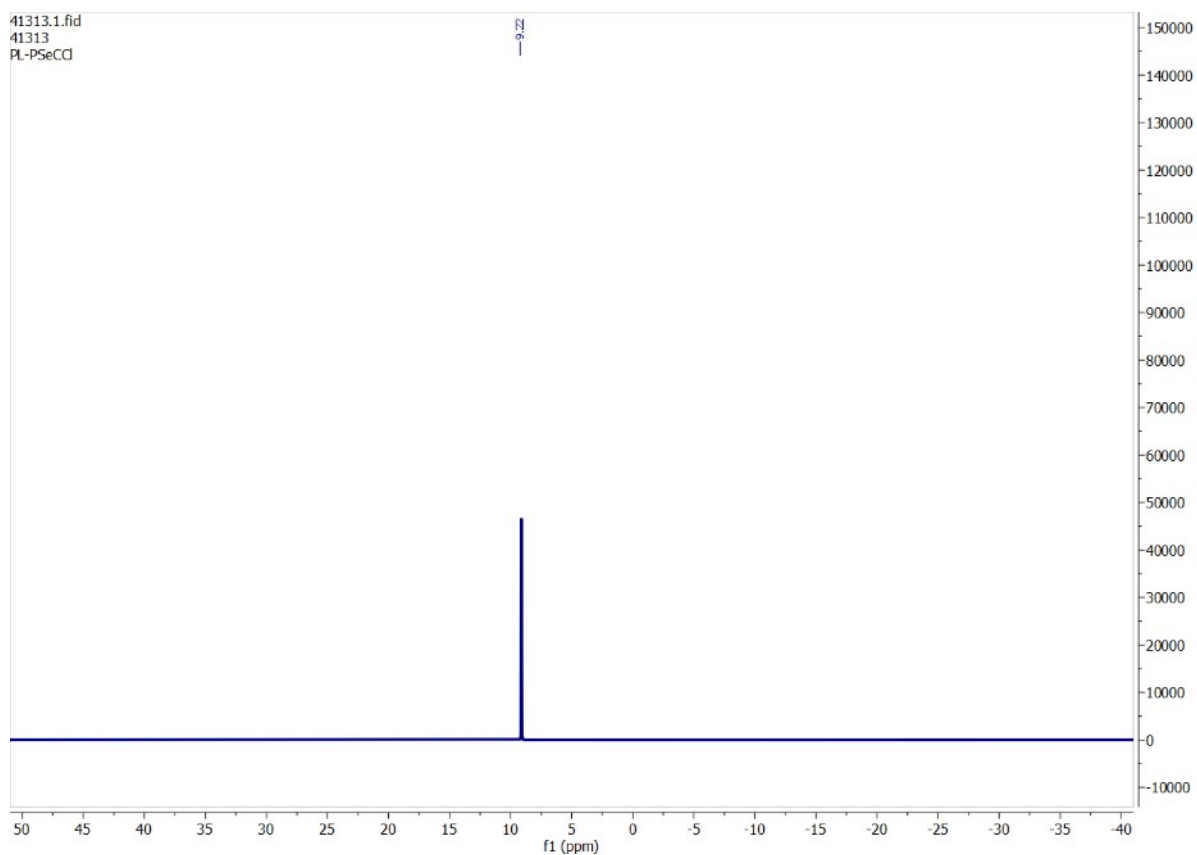

**Fig. S89.**  $^{31}\text{P}$ -NMR spectrum of phosphate complex obtained from LLE in the presence of selenate, carbonate and chloride as competing anions.

#### 14. Sulfate extraction under environmentally relevant conditions

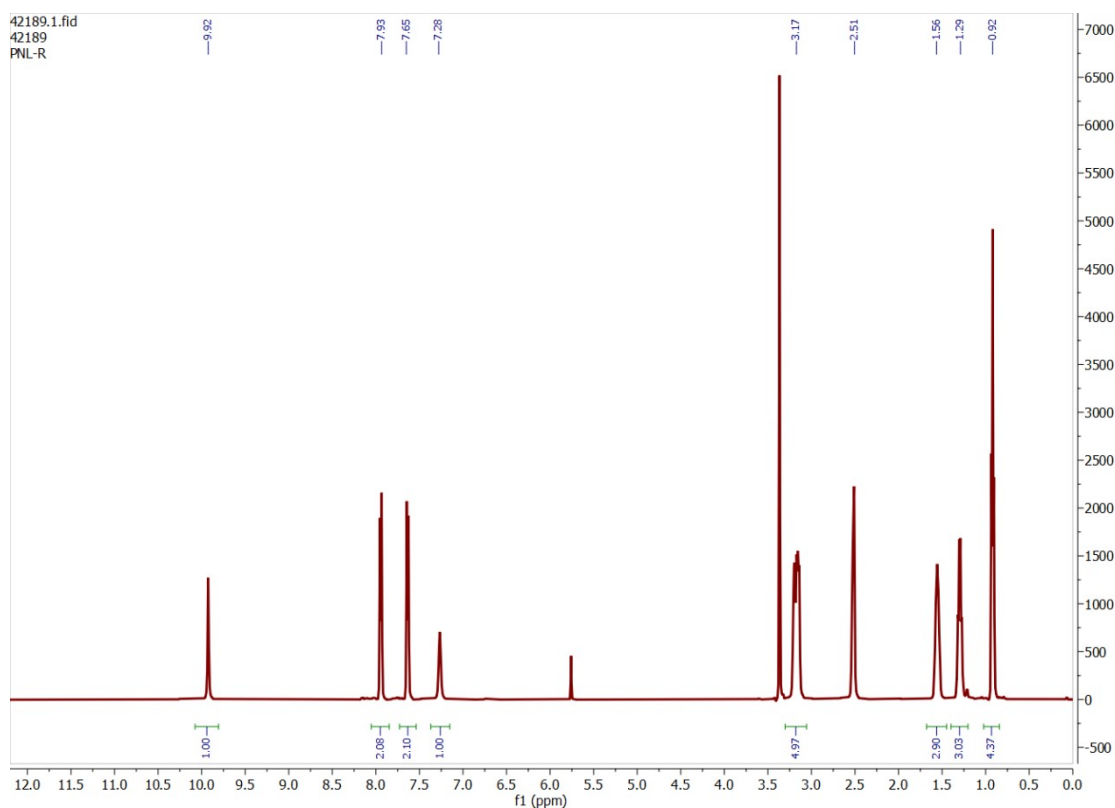

**Fig. S90.**  $^1\text{H-NMR}$  spectrum of  $[(n\text{-Bu}_4\text{N})_2(2\text{L}_2\cdot\text{SO}_4)]$  obtained from LLE using aqueous solution mimicking the anion distribution in upper Ganga River basin.

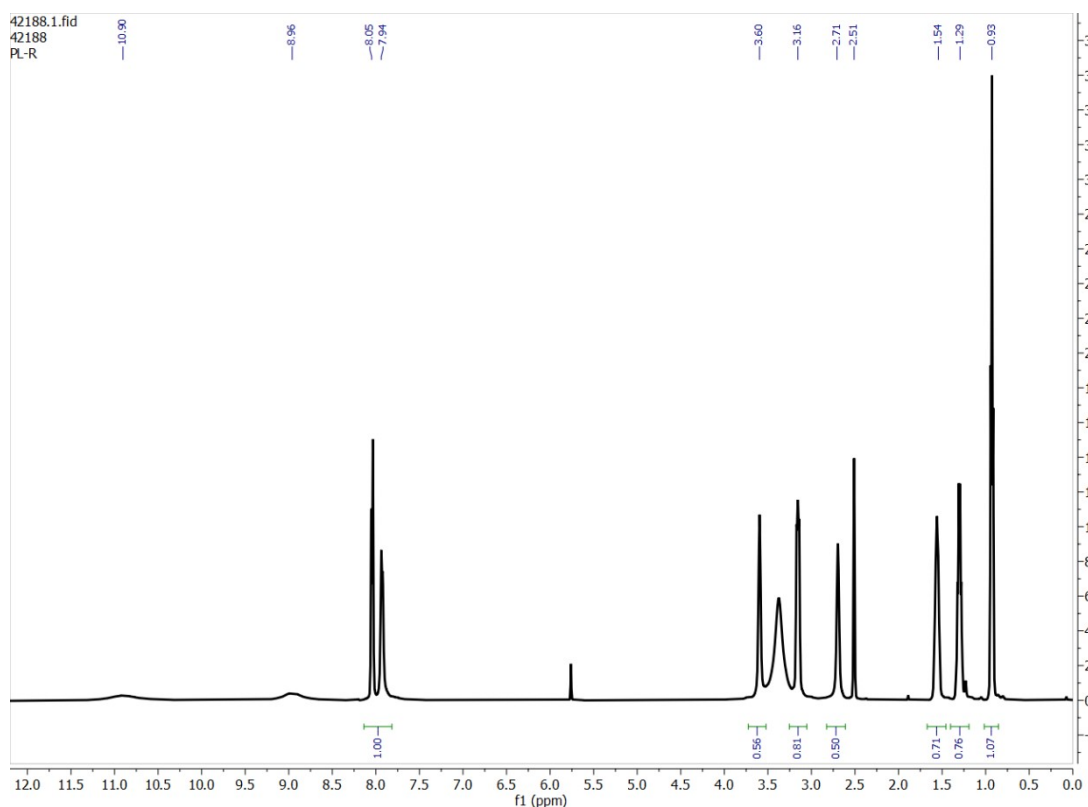

**Fig. S91.**  $^1\text{H-NMR}$  spectrum of  $[(n\text{-Bu}_4\text{N})_2(2\text{L}_4\cdot\text{SO}_4)]$  obtained from LLE using aqueous solution mimicking the anion distribution in upper Ganga River basin

### 15. Control experiments: $^1\text{H-NMR}$ and $^{31}\text{P-NMR}$ spectra

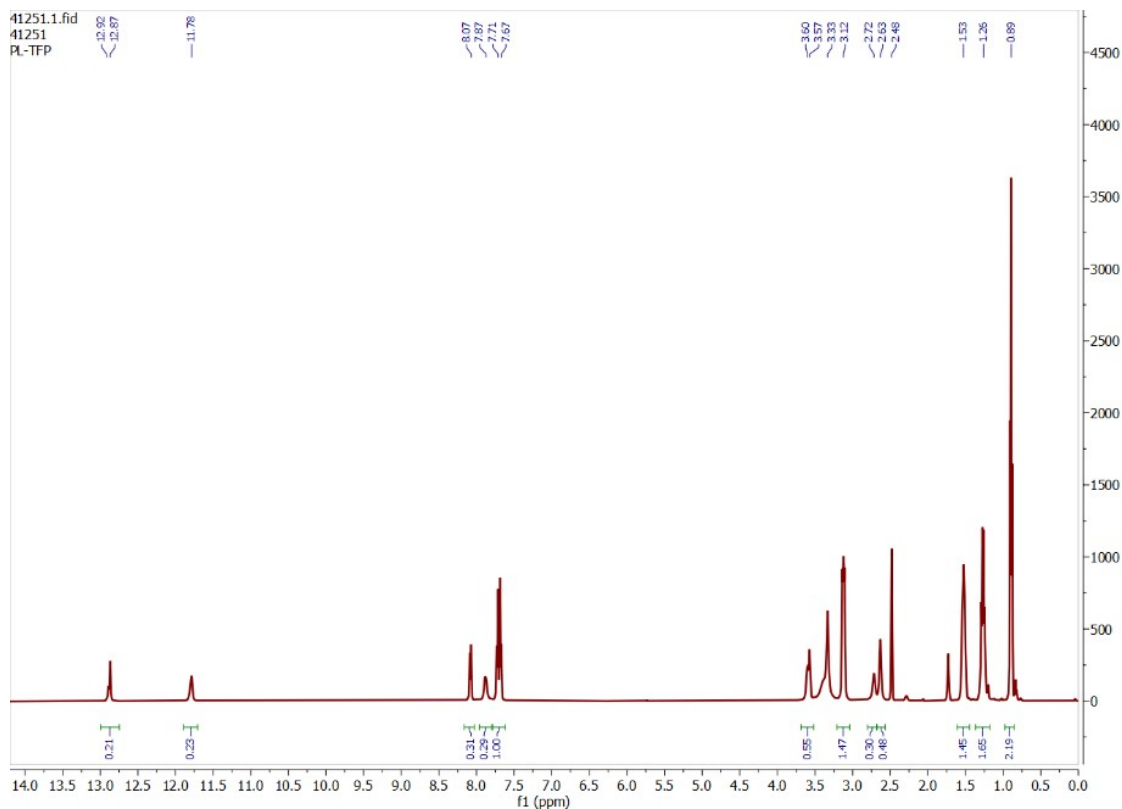

**Fig. S92.**  $^1\text{H-NMR}$  spectrum of phosphate complex obtained from LLE in the presence of tetrabutylammonium fluoride as an anion-exchanger in the organic phase for phosphate extraction by  $\text{L}_4$  from aqueous phase (Ratio of  $[(n\text{-Bu}_4\text{N})_2(2\text{L}_4\cdot\text{HPO}_4)]$  and  $[(n\text{-Bu}_4\text{N})_3(2\text{L}_4\cdot\text{PO}_4)] = 40:60$ ).

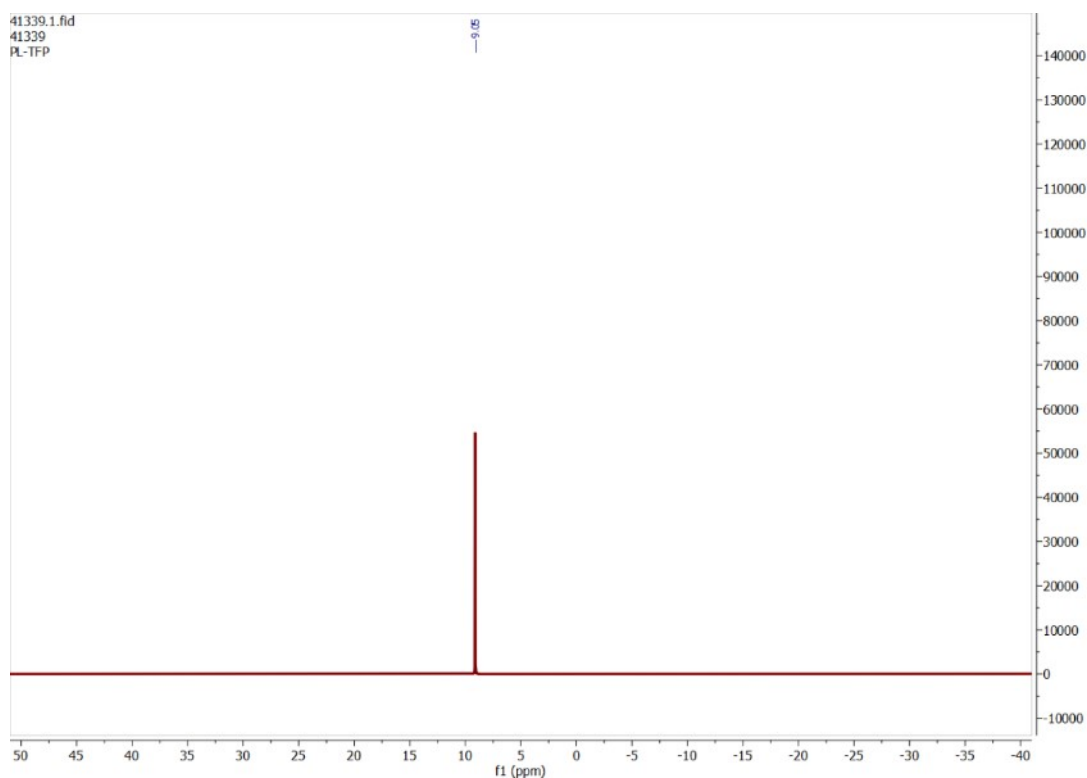

**Fig. S93.**  $^{31}\text{P-NMR}$  spectrum of phosphate complex obtained from LLE in the presence of tetrabutylammonium fluoride as an anion-exchanger in the organic phase for phosphate extraction by  $\text{L}_4$  from aqueous phase.



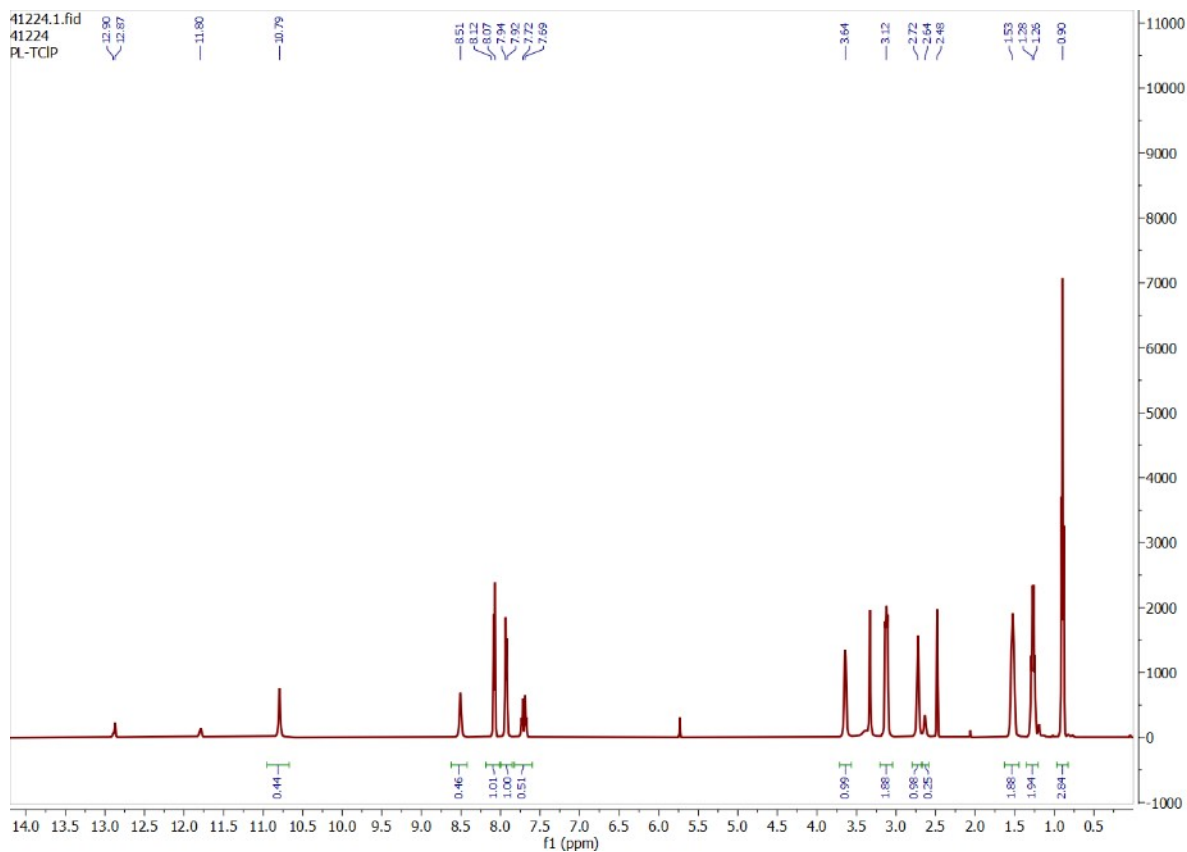

**Fig. S94.**  $^1\text{H-NMR}$  spectrum of phosphate complex obtained from LLE in the presence of tetrabutylammonium chloride as an anion-exchanger in the organic phase for phosphate extraction by  $\text{L}_4$  from aqueous phase (Ratio of  $[(n\text{-Bu}_4\text{N})_2(2\text{L}_4\cdot\text{HPO}_4)]$  and  $[(n\text{-Bu}_4\text{N})_3(2\text{L}_4\cdot\text{PO}_4)]$ : 80:20).

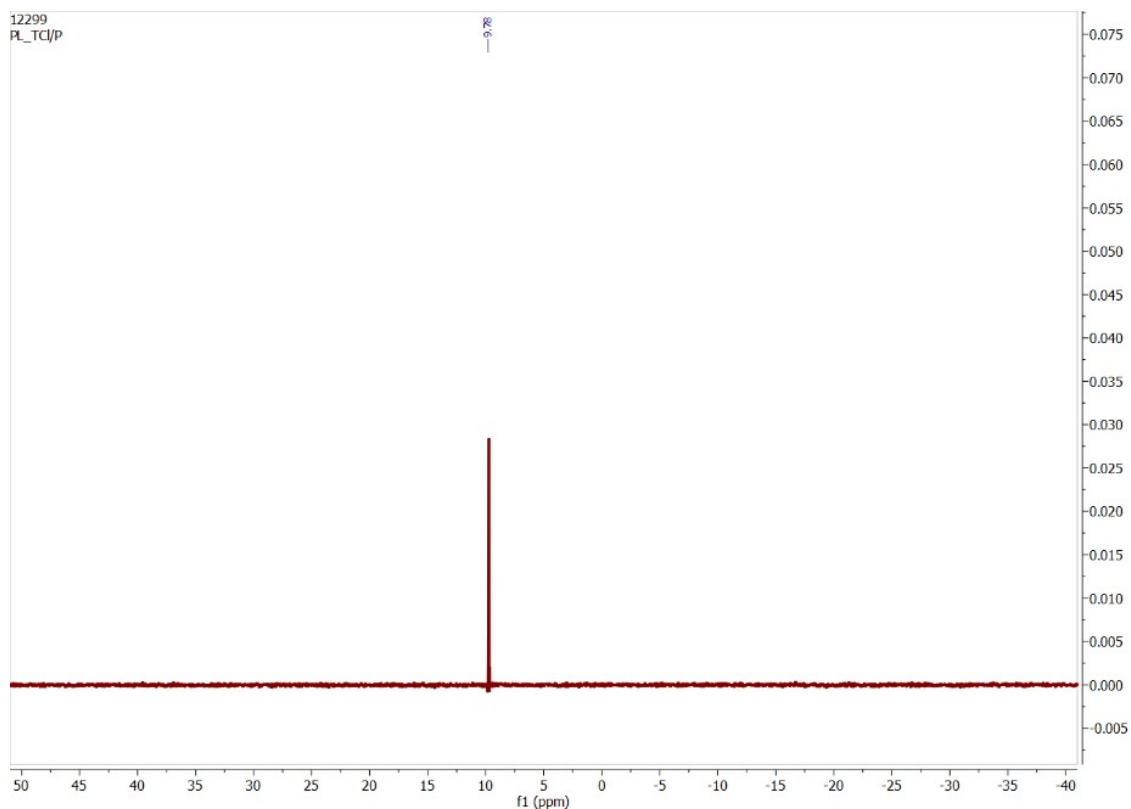

**Fig. S95.**  $^{31}\text{P}$ -NMR spectrum of phosphate complex obtained from LLE in the presence of tetrabutylammonium chloride as an anion-exchanger in the organic phase for phosphate extraction by  $\text{L}_4$  from aqueous phase.

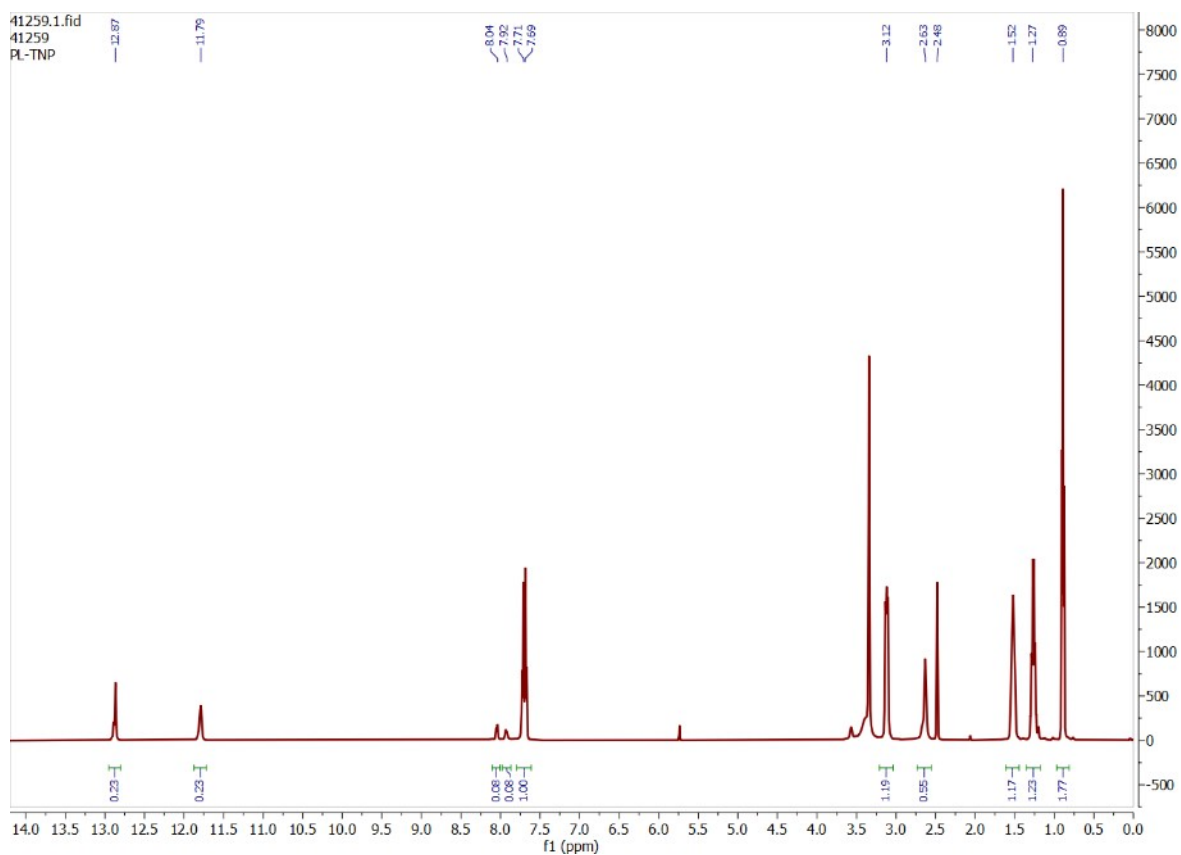

**Fig. S96.**  $^1\text{H}$ -NMR spectrum of phosphate complex obtained from LLE in the presence of tetrabutylammonium nitrate as an anion-exchanger in the organic phase for phosphate extraction by  $\text{L}_4$  from aqueous phase (Ratio of  $[(\text{n-Bu}_4\text{N})_2(2\text{L}_4\cdot\text{HPO}_4)]$  and  $[(\text{n-Bu}_4\text{N})_3(2\text{L}_4\cdot\text{PO}_4)]$ : 15:85).

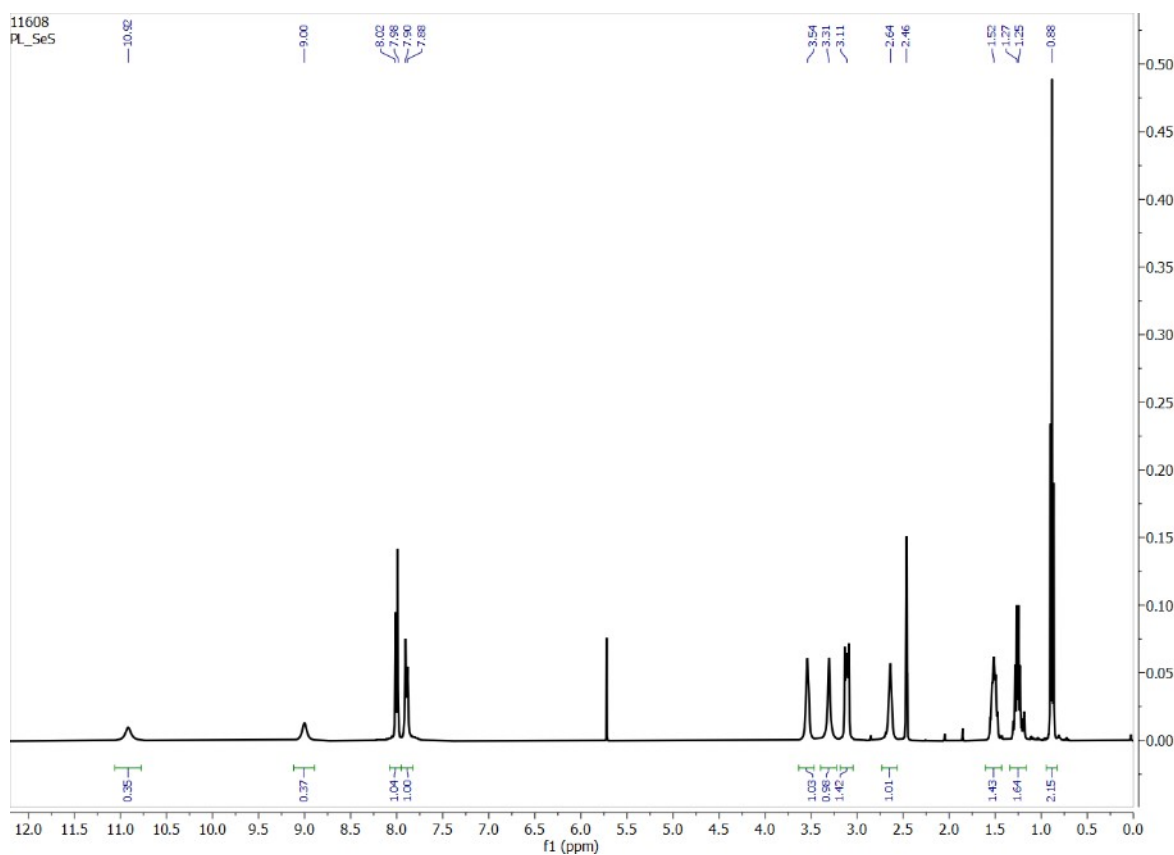

**Fig. S97.**  $^1\text{H-NMR}$  spectrum of  $[(n\text{-Bu}_4\text{N})_2(2\text{L}_4\cdot\text{SO}_4)]$  obtained from LLE in the presence of selenate as a competing anion.

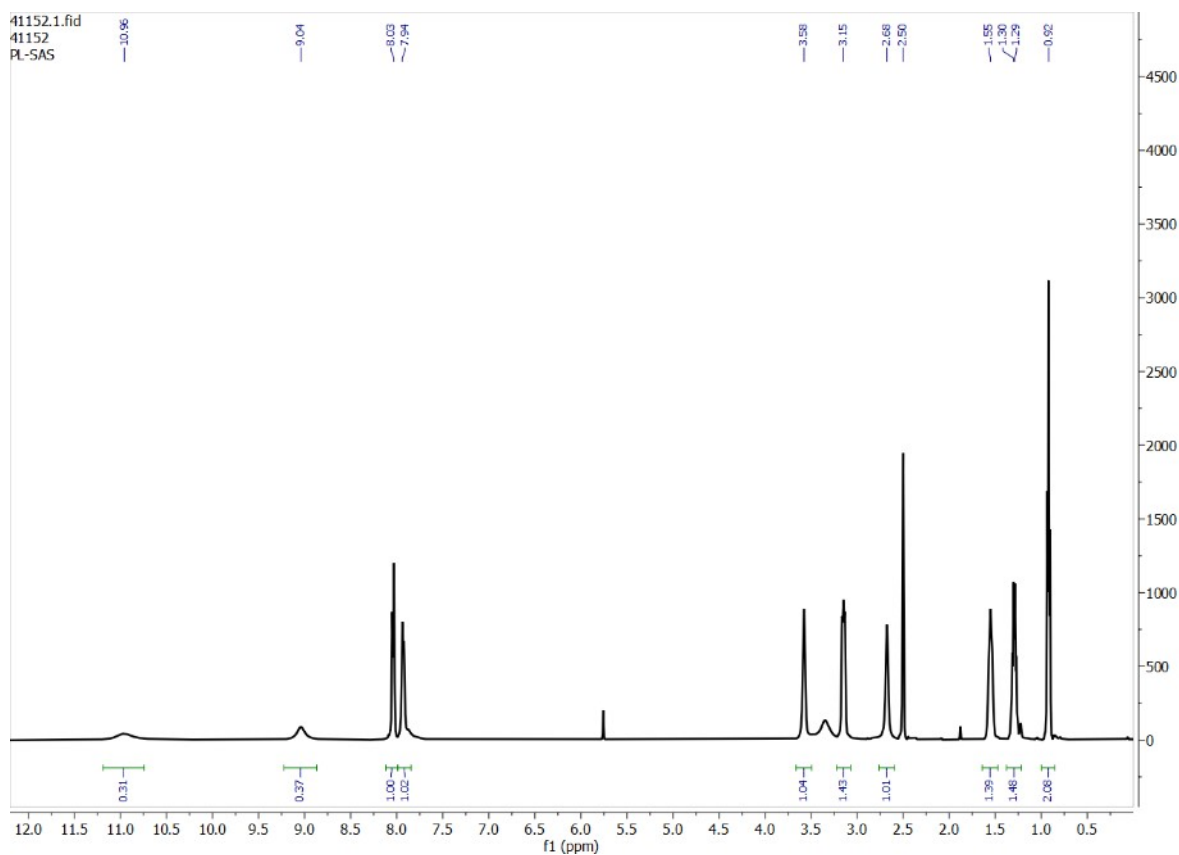

**Fig. S98.**  $^1\text{H-NMR}$  spectrum of  $[(n\text{-Bu}_4\text{N})_2(2\text{L}_4\cdot\text{SO}_4)]$  obtained from LLE in the presence of hydrogenarsenate as a competing anion.

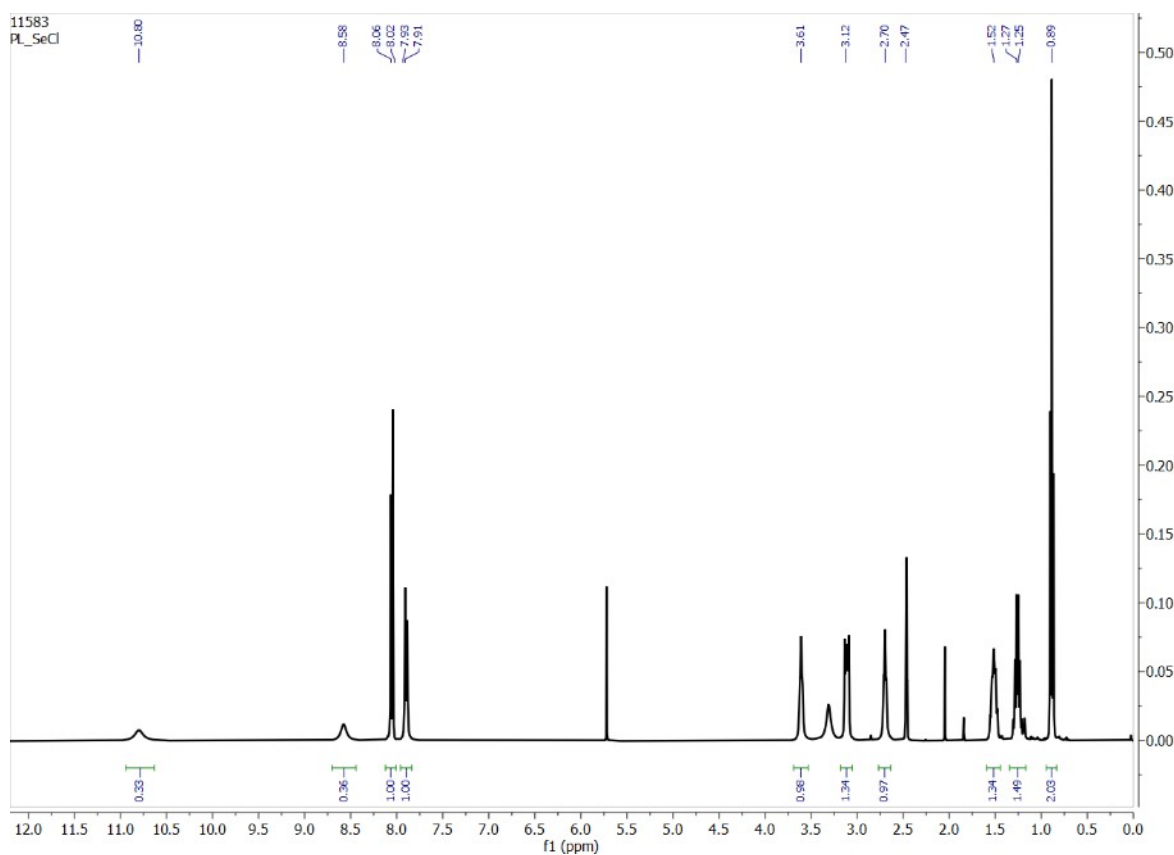

**Fig. S99.**  $^1\text{H-NMR}$  spectrum of  $[(n\text{-Bu}_4\text{N})(\text{L}_4\cdot\text{Cl})]$  obtained from LLE in the presence of selenate as a competing anion.

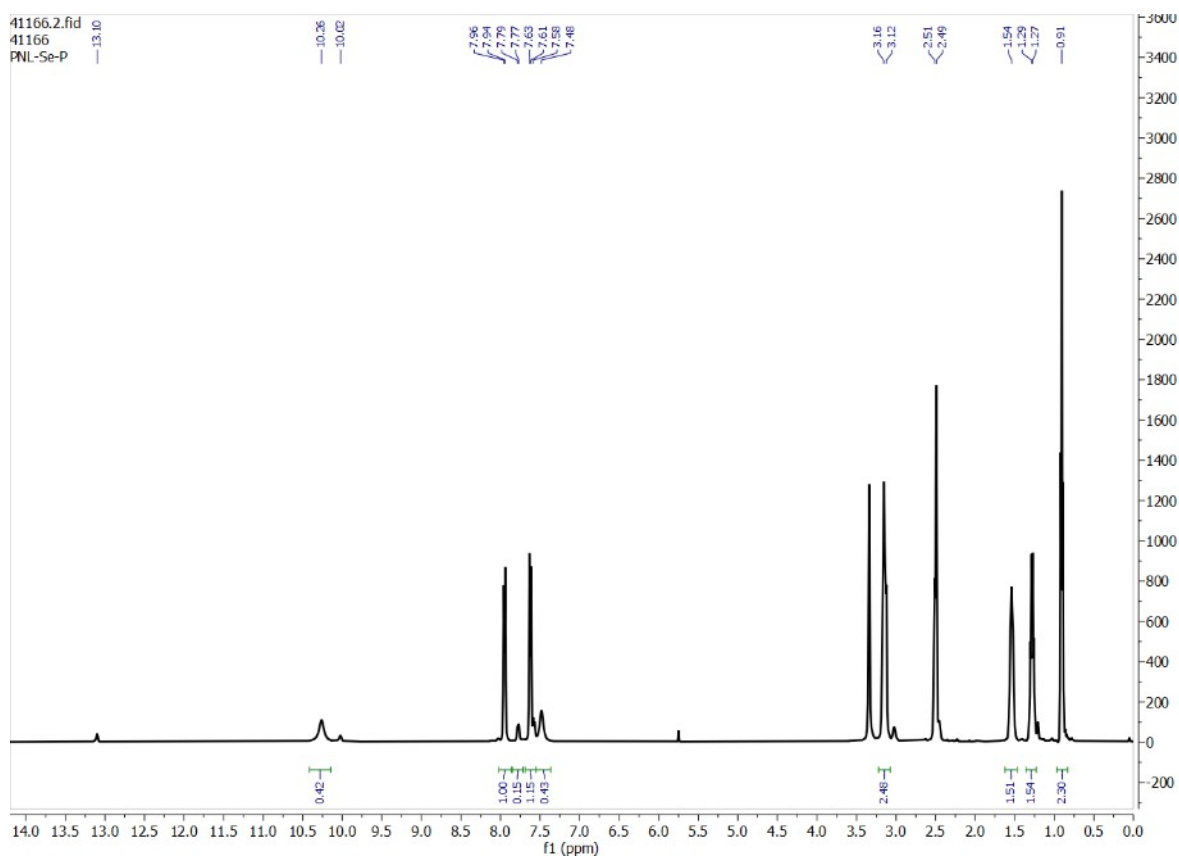

**Fig. S100.**  $^1\text{H-NMR}$  spectrum of  $[(n\text{-Bu}_4\text{N})_2(2\text{L}_2\cdot\text{HPO}_4)]$  obtained from LLE in the presence of selenate as a competing anion.

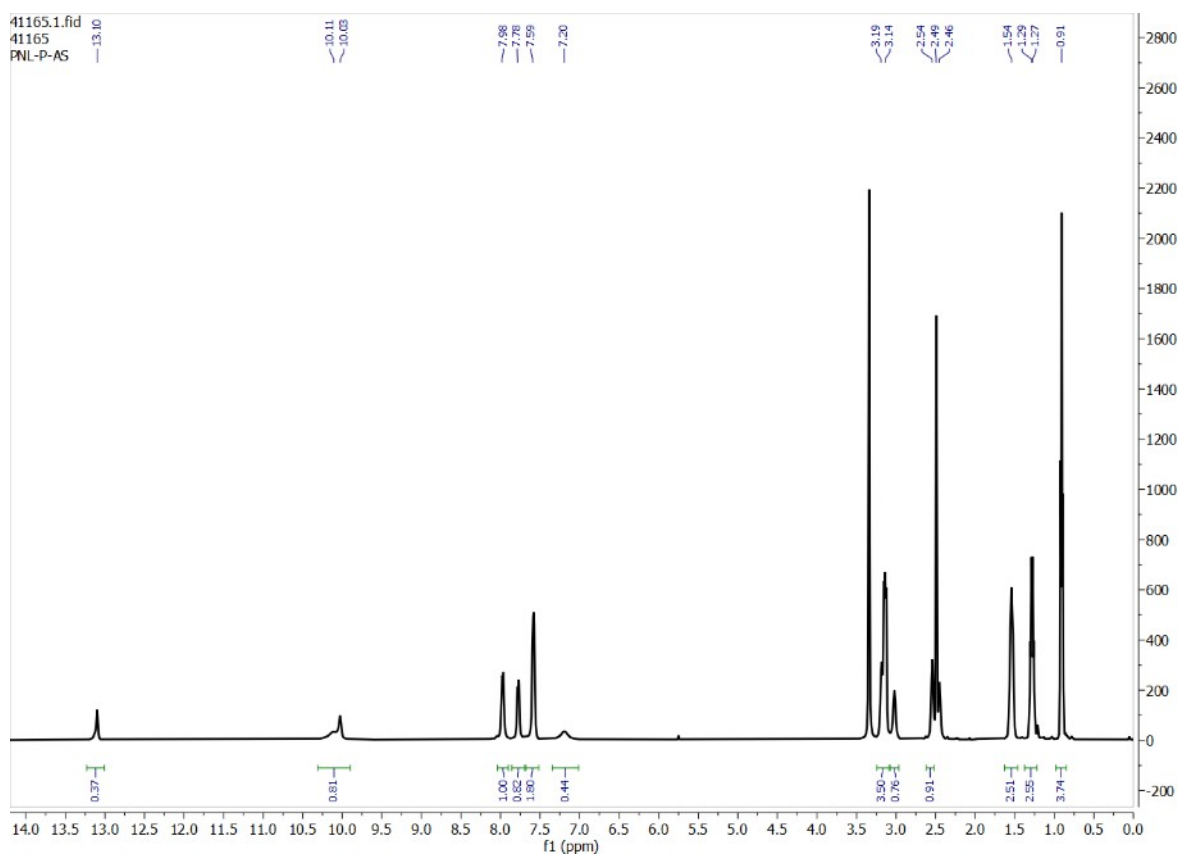

**Fig. S101.**  $^1\text{H-NMR}$  spectrum of  $[(n\text{-Bu}_4\text{N})_2(2\text{L}_2\cdot\text{HPO}_4)]$  obtained from LLE in the presence of arsenate as a competing anion.

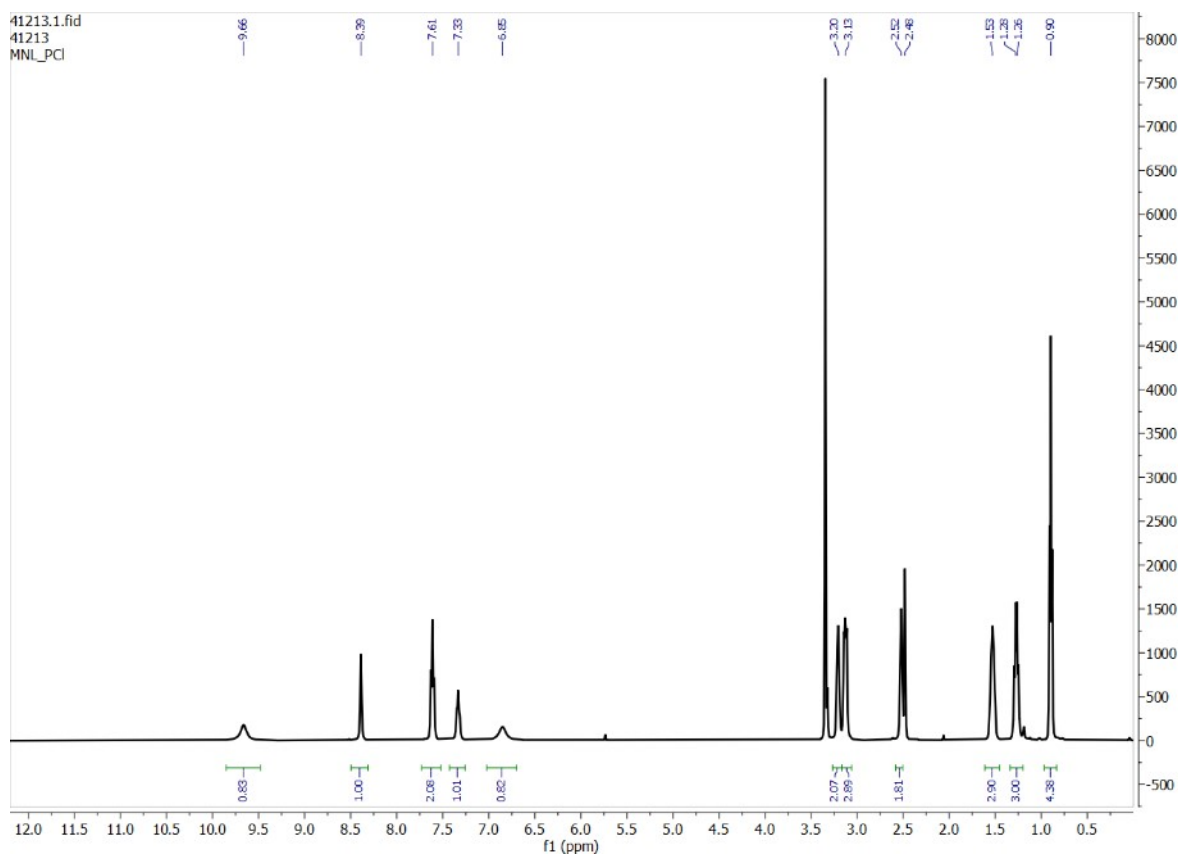

**Fig. S102.**  $^1\text{H-NMR}$  spectrum of  $[(n\text{-Bu}_4\text{N})(\text{L}_1\cdot\text{Cl})]$  obtained from LLE in the presence of hydrogenphosphate as a competing anion.

## **16. Powder X-ray diffraction analysis**

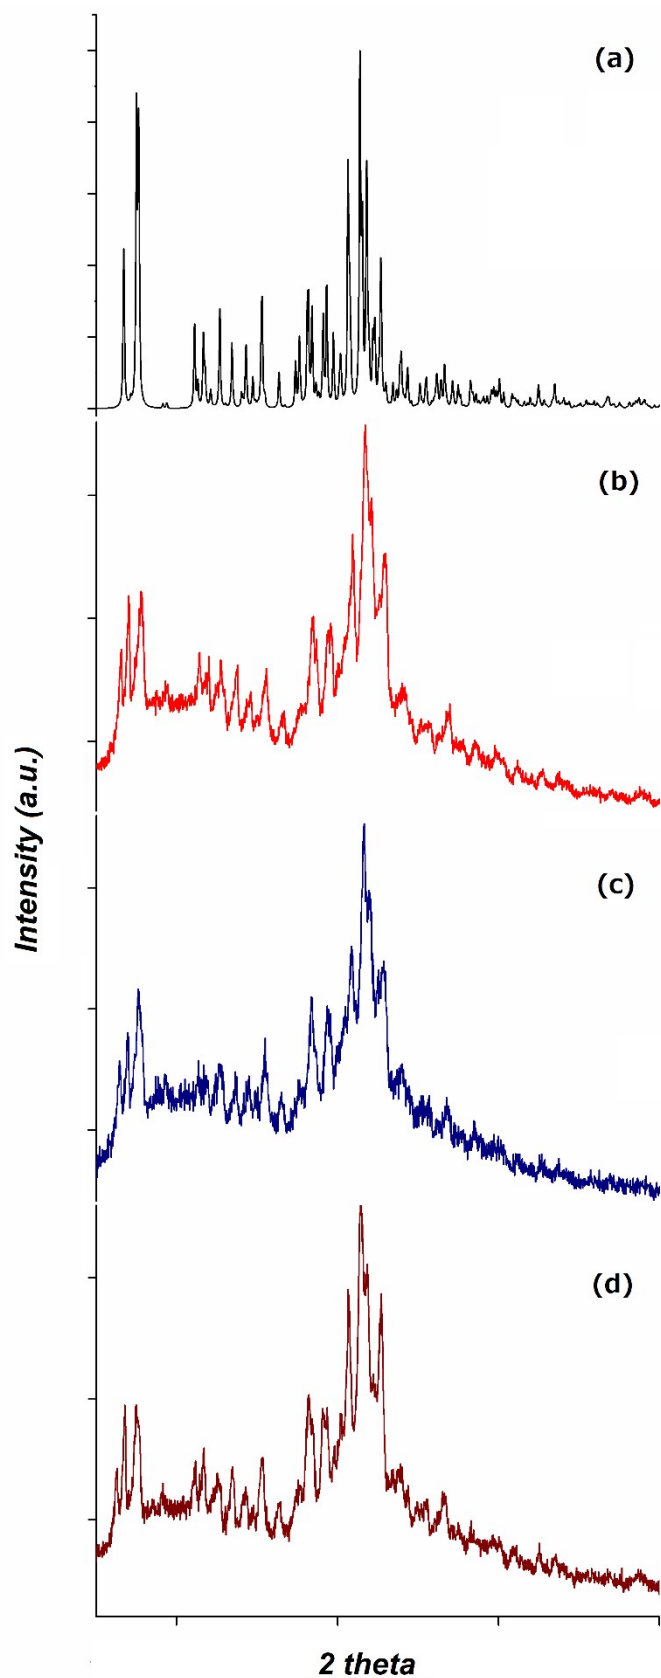

**Fig. S103.** (a) Simulated PXRd of the crystal structure of  $[(n\text{-Bu}_4\text{N})_2(2\text{L}_3\text{-SO}_4)]$ , and experimental PXRd of  $[(n\text{-Bu}_4\text{N})_2(2\text{L}_3\text{-SO}_4)]$  complex obtained from LLE in the presence of (b) hydrogenphosphate, (b) hydrogenphosphate and carbonate, (c) hydrogenphosphate, carbonate and fluoride, as competing anions.

**Single-crystal XRD data collection:** Single-crystal XRD data were collected at 293(2) K with an Agilent SuperNova diffractometer with micro-focus X-ray on Cu-K $\alpha$  radiation ( $\lambda = 1.5418 \text{ \AA}$ ). CrysAlisPro software was used to collect, index, scale and apply analytical absorption correction based on Gaussian method<sup>3</sup>.

**Structure Analysis and Refinement.** The structure was solved by direct methods (*SHELXS-2018/2*)<sup>4</sup>, refinement was done by full-matrix least squares on  $F^2$  using the *SHELXL-2018/3* program suite<sup>5</sup> and the graphical user interface (GUI) *ShelXle*<sup>6</sup> was used. All non-hydrogen positions were refined with anisotropic temperature factors.

Hydrogen atoms were placed geometrically for aromatic C-H hydrogen of the tris-urea receptor and refined using a riding model (AFIX 43) with  $U_{\text{iso}}(\text{H}) = 1.2U_{\text{eq}}(\text{C})$ .

Urea N-H hydrogen atoms were positioned geometrically (N-H = 0.86  $\text{\AA}$ ) and refined using a riding model (AFIX 43) with  $U_{\text{iso}}(\text{H}) = 1.2U_{\text{eq}}(\text{N})$ .

Secondary hydrogen atoms of tris-urea receptors carbon atoms and tetrabutylammonium cation were also positioned geometrically (C-H=0.94  $\text{\AA}$ ) and refined using a riding model (AFIX 23) with  $U_{\text{iso}}(\text{H}) = 1.2U_{\text{eq}}(\text{C})$ .

Hydrogen atoms of the methyl groups of tetrabutylammonium cation were positioned geometrically (C-H=0.96  $\text{\AA}$ ) and refined using a riding model (AFIX 137) with  $U_{\text{iso}}(\text{H}) = 1.5U_{\text{eq}}(\text{C})$ .

4-fluorophenyl ring of the labelled "A" arm of the tris-urea receptor displays disorder, so that in order the C-C distances to be similar, this ring was fitted to a regular hexagon with AFIX 66. Moreover, atomic displacement parameters of the carbon atoms were restricted to be similar by the use of SIMU restraints.

Terminal methyl group and neighbor carbon atom of the labelled "E" tetrabutylammonium ligand arm were refined using RIGU restraints to model the anisotropic atomic displacement parameters. These atoms appear also disordered in two positions which were modelled using PART commands and DFIX and DANG restraints for the C-C and C-H distances involved.

**Table S1.** Selected hydrogen bond parameters of the sulfate complex, [(n-Bu<sub>4</sub>N)<sub>2</sub>(2L<sub>3</sub>·SO<sub>4</sub>)].

| $D-H\cdots A$                    | $H\cdots A$ ( $\text{\AA}$ ) | $D\cdots A$ ( $\text{\AA}$ ) | $D-H\cdots A$ ( $^\circ$ ) |
|----------------------------------|------------------------------|------------------------------|----------------------------|
| N1A—H1A $\cdots$ O2              | 2.55                         | 3.227 (5)                    | 136                        |
| N1A—H1A $\cdots$ O3              | 2.42                         | 3.243 (5)                    | 161                        |
| N1A—H1A $\cdots$ O4 <sup>i</sup> | 2.15                         | 2.957 (5)                    | 157                        |
| N1B—H1B $\cdots$ O1              | 2.45                         | 3.197 (5)                    | 145                        |
| N1B—H1B $\cdots$ O4 <sup>i</sup> | 2.07                         | 2.924 (5)                    | 170                        |
| N1C—H1C $\cdots$ S1              | 3.02                         | 3.862 (3)                    | 167                        |
| N1C—H1C $\cdots$ O2              | 2.22                         | 3.034 (5)                    | 158                        |
| N1C—H1C $\cdots$ O4 <sup>i</sup> | 2.19                         | 3.017 (6)                    | 161                        |
| N2A—H2A $\cdots$ O1 <sup>i</sup> | 2.35                         | 3.155 (4)                    | 156                        |
| N2A—H2A $\cdots$ O2              | 2.16                         | 2.965 (4)                    | 156                        |
| N2B—H2B $\cdots$ S1              | 2.94                         | 3.765 (2)                    | 162                        |
| N2B—H2B $\cdots$ O2 <sup>i</sup> | 2.39                         | 3.107 (5)                    | 141                        |
| N2B—H2B $\cdots$ O3              | 2.05                         | 2.898 (4)                    | 169                        |



|                           |      |           |     |
|---------------------------|------|-----------|-----|
| N2B—H2B···O4 <sup>i</sup> | 2.59 | 3.353 (6) | 148 |
| N2C—H2C···O1              | 2.22 | 2.997 (5) | 151 |
| N2C—H2C···O3 <sup>i</sup> | 2.25 | 3.071 (5) | 160 |

## References

1. (a) S. K. Dey, R. Chutia and G. Das, *Inorg. Chem.*, 2012, **51**, 1727–1738, (b) N. Busschaert, M. Wenzel, M. E. Light, P. Iglesias-Hernández, R. Pérez-Tomás, and P. A. Gale, *J. Am. Chem. Soc.*, 2011, **133**, 14136–14148.
2. S. K. Dey and G. Das, *Dalton Trans.*, 2012, **41**, 8960–8972.
3. O. D. Rigaku, *CrysAlis PRO*, 1.171.41.122a, Oxford, U.K., 2021.
4. G. M. Sheldrick, SHELXT—Integrated space-group and crystal-structure determination. *Acta Crystallogr. Sect. A*, 2015, **71**, 3-8.
5. G. M. Sheldrick, SHELXL version 2018/3; University of Göttingen, Germany, 2018.
6. C. B. Hubschle, C. B. Sheldrick, B. Dittrich, ShelXle: A Qt graphical user interface for SHELXL. *J. Appl. Crystallogr.*, 2011, **44**, 1281-1284.
